# Supplementary material
Source: ML conference proceedings conference paper supplement (https://openreview.net/forum?id=KQLCim1NhT)
Supplement: supplementary_material [file Quantum_Inspired_SHAP.pdf › Quantum_Inspired_SHAP.pdf]

---

# A Unified Framework for Provably Efficient Algorithms to Estimate Shapley Values

---

Tyler Chen\* Akshay Seshadri\* Mattia J. Villani\* Pradeep Niroula  
Shouvanik Chakrabarti Archan Ray Pranav Deshpande Romina Yalovetzky  
Marco Pistoia Niraj Kumar†  
Global Technology Applied Research, JPMorganChase, New York, NY 10001, USA

## Abstract

Shapley values have emerged as a critical tool for explaining which features impact the decisions made by machine learning models. However, computing exact Shapley values is difficult, generally requiring an exponential (in the feature dimension) number of model evaluations. To address this, many model-agnostic randomized estimators have been developed, the most influential and widely used being the KernelSHAP method (Lundberg & Lee, 2017). While related estimators such as unbiased KernelSHAP (Covert & Lee, 2021) and LeverageSHAP (Musco & Witter, 2025) are known to satisfy theoretical guarantees, bounds for KernelSHAP have remained elusive. We describe a broad and unified framework that encompasses KernelSHAP and related estimators constructed using both with and without replacement sampling strategies. We then prove strong non-asymptotic theoretical guarantees that apply to all estimators from our framework. This provides, to the best of our knowledge, the first theoretical guarantees for KernelSHAP and sheds further light on tradeoffs between existing estimators. Through comprehensive benchmarking on small and medium dimensional datasets for Decision-Tree models, we validate our approach against exact Shapley values, consistently achieving low mean squared error with modest sample sizes. Furthermore, we make specific implementation improvements to enable scalability of our methods to high-dimensional datasets. Our methods, tested on datasets such as MNIST and CIFAR10, provide consistently better results compared to the KernelSHAP library.

## 1 Introduction

Explaining the prediction of a machine learning model is as important as building the model itself, since it helps determine whether the model can be trusted to give meaningful predictions when deployed in real world [RSG16]. Such explanations of black-box decisions are all the more important in sensitive applications, such as medicine, finance, and law [Bur+16].

In the quest of explaining models, recent line of research has focused on developing *local explanation* methods with the objective to identify the degree of influence of each feature that a specific data point has on the model prediction. These include Explanation vectors [Bae+10], LIME [RSG16], and Shapley values [ŠK14]. When local methods are expressed as additive feature attribution methods, i.e., the feature influence linearly adds up to provide the model prediction, [LL17] provided game theoretic results guaranteeing that Shapley values provide a unique solution to additive feature attribution. For these reasons, it has emerged as a front-runner model agnostic explanation tool.

---

\*Equal contribution. Email: {akshay.seshadri, tyler.chen, mattia.villani}@jpmchase.com.

†Principal Investigator. Email: niraj.x7.kumar@jpmchase.com.

Shapley values have found relevance in other machine learning applications too. They have been used in measuring the global sensitivity analysis where for instance they have been used to partition the coefficient of determination quantity in linear regression [SNS16]. More concretely, Shapley values offer a general approach of answering the following question: *given a model  $f$  trained on data-points with  $d$  features, and evaluated on a test sample  $\mathbf{q} \in \mathbb{R}^d$ , how does each feature of  $\mathbf{q}$  locally influence the final model decision  $f(\mathbf{q})$ ?*

Consider the value function  $v : 2^{[d]} \rightarrow \mathbb{R}$ , where  $v(S)$  depends on the output of the model on a test sample  $\mathbf{q}$  using only the subset of features corresponding to the elements of the subset  $S$  of  $[d] = \{1, \dots, d\}$ . For instance, given a baseline  $\mathbf{q}^{\text{base}}$ , we may define  $v(S) = f(\mathbf{q}^{(S)})$  where  $\mathbf{q}_j^{(S)} = \mathbf{q}_j$  if  $j \in S$  and  $\mathbf{q}_j^{\text{base}}$  otherwise.<sup>3</sup> The Shapley value  $\phi_j^*$  corresponding to the  $j$ -th feature contribution is defined as

$$\phi_j^* = \sum_{S \subseteq [d] \setminus \{j\}} \frac{|S|!(d - |S| - 1)!}{d!} (v(S \cup \{j\}) - v(S)) \quad (1.1)$$

which is the aggregate of the marginal contribution of feature  $j$  to the model prediction achievable by the modified mean of all the subsets  $S$  that do not contain the feature  $j$ . As  $d$  increases, an exact solution quickly cannot be computed and estimation techniques are required. However, as Shapley values are increasingly used to interpret the model behavior, the quality of the estimator is of the utmost importance: an unfaithful explanation may lead to incorrect model interventions, business decisions or court judgments whenever model assessment is involved.

## 1.1 Fast Approximate Estimators

In general, computing (1.1) requires evaluating  $v(S)$  on each of the *exponentially many* subsets of  $[d]$ . Each evaluation of  $v(S)$  is costly, with the exact cost depending on the way  $v(S)$  is defined. While this cost can be reduced for certain types of simple models [LEL18], an appealing aspect of Shapley values is the potential for model-agnostic explanations.

To make Shapley values computationally tractable for arbitrary models, multiple randomized estimators have been proposed. Such methods aim to approximate the Shapley values, while using a sub-exponential number of value-function evaluations; see [CGT09; WF20; OL21; MCFH22; Zha+24]. Perhaps the most popular is a method called *KernelSHAP*, which is implemented in the widely used SHAP library [LL17]. KernelSHAP and related estimators are the focus of this paper.

**Approximate Shapley Value Estimation.** In what follows, the all ones vector and zero vector are  $\mathbf{1}$  and  $\mathbf{0}$  respectively, and the  $j$ -th standard basis vector is  $\mathbf{e}_j$ . Given a vector  $\mathbf{a}$ ,  $\|\mathbf{a}\|$  denotes its Euclidean norm, while for a matrix  $\mathbf{A}$ ,  $\|\mathbf{A}\|$  denotes its spectral norm. The key observation [CGKR88] used by KernelSHAP and related estimators is that the Shapley values are the solution to a certain constrained least squares problem

$$\phi^* = \underset{\substack{\phi \in \mathbb{R}^d \\ \mathbf{1}^\top \phi = v([d]) - v(\emptyset)}}{\operatorname{argmin}} \|\mathbf{Z}' \phi - \mathbf{b}\|^2, \quad (1.2)$$

where  $\mathbf{Z}' = \sqrt{\mathbf{W}} \mathbf{Z}$ ,  $\mathbf{b} = \sqrt{\mathbf{W}} \mathbf{v}$ , and<sup>4</sup>

- $\mathbf{Z}$  is a  $(2^d - 2) \times d$  binary matrix:  $\mathbf{Z}_{S,j} = 1$  if  $j \in S$  and  $\mathbf{Z}_{S,j} = 0$  if  $j \notin S$
- $\mathbf{W}$  is a  $(2^d - 2) \times (2^d - 2)$  diagonal matrix:  $\mathbf{W}_{S,S} = k(S) = (d - 1) / \binom{d}{|S|} |S| (d - |S|)$
- $\mathbf{v}$  is a  $2^d - 2$  length vector:  $\mathbf{v}_S = v(S) - v(\emptyset)$ .

As with the definition of the Shapley values (1.1), the regression formulation (1.2) requires the knowledge of  $v(S)$  for each  $2^d$  subsets of  $[d]$ . To get around this cost, KernelSHAP (randomly) subsamples and reweights the rows of (1.2), and then outputs the solution to the (much smaller) constrained regression problem. The sampling of the  $S$ -th row  $\mathbf{Z}_S$  is done proportional to the kernel

<sup>3</sup>There are other established ways to do this including replacing a fixed baseline with an expectation over suitable inputs or even training the model with only the features in  $S$  present [CSWJ18; LL17]. The precise choice is not important for us, as the methods discussed in this paper work for any value function.

<sup>4</sup>The matrices are indexed by  $S \subseteq 2^{[d]} \setminus \{[d], \emptyset\}$ .

weight  $k(S)$ , a choice made based on the observation that the objective function  $\|\mathbf{Z}'\phi - \mathbf{b}\|^2$  can be written as an expectation  $\mathbb{E}[(\mathbf{Z}_S\phi - \mathbf{v}_S)^2]$  with respect to this sampling distribution, as explained in [Appendix B.1](#). Other practical improvements such as *paired-sampling* and *sampling without replacement* are also included in the implementation of KernelSHAP in the SHAP library.

A large number of subsequent works have built on KernelSHAP [CL20; LL17; AJL21; Zha+24; MW25; Jet+21; KZ22; Fum+24; KTL24]. Of particular relevance to the present work are *unbiased KernelSHAP* [CL20] and *LeverageSHAP* [MW25] which, to the best of our knowledge, are the only extensions of KernelSHAP with theoretical convergence guarantees. The method of [CL20] is an unbiased variant of KernelSHAP for which an asymptotic variance analysis is given. It was however observed that this method tends to underperform compared to the original KernelSHAP in practice. The method of [MW25] is a regression-based estimator and satisfies strong non-asymptotic theoretical guarantees. Numerical experiments suggest that it may outperform KernelSHAP in most settings.

**High-Dimensional Estimators.** Additionally, several works have specifically focused on the challenges of computing Shapley values for high-dimensional data [AJL21; CSWJ18; Jet+21; Fry+20; HZFS24; Zha+24]. These use parametric approaches to the computation of Shapley values; however, they require overhead model pretraining. Building on [Fry+20], [HZFS24] develop a method for high-dimensional SHAP estimation using latent features. [CSWJ18] propose a specific approach for data structured on graphs; such approaches avoid computing SHAP for large dimensions leveraging inductive biases. Recently, [Zha+24] propose SimSHAP, an unbiased alternative to [Jet+21]. Methods for large language models, such as [Kok+21] have recently been developed; however, no algorithm at present is tailored for high dimensional settings while providing provable guarantees on sample efficiency.

## 1.2 Our Contribution

In this work, we present a novel and unified framework to analyze Shapley value estimators. Using tools from randomized linear algebra, we prove non-asymptotic sample complexity guarantees on the efficient behavior of the estimators, including KernelSHAP [LL17] and LeverageSHAP [MW25]. Specifically, we identify three main contributions of the present work:

- **Unified Framework:** We present a unified framework which encompasses many existing randomized estimators for Shapley values, including the widely used KernelSHAP method. Our framework is derived by rewriting the standard constrained regression formulation of the Shapley values as either an ordinary linear regression problem or a matrix-vector multiplication.
- **Provable Guarantees:** We prove non-asymptotic sample-complexity bounds for estimators within our framework constructed via both with and without replacement sampling strategies. *This immediately gives, for the first time to our knowledge, theoretical guarantees for KernelSHAP.* Our theory also provides insight into the relative performance of estimators such as LeverageSHAP and KernelSHAP, as well as a novel estimator built with kernel re-weighted  $\ell_2$  distribution.
- **Shapley Value Estimation for High Dimensional Inputs:** We make specific implementation improvements to Shapley value computation that allow our methods to scale beyond all other theoretically grounded methods. We test these on image datasets (MNIST and CIFAR10) with consistently better results compared to KernelSHAP library.

These advancements promote trust in the estimation of Shapley values, enabling their usage in safety-critical applications. In [Section 2](#), we develop the unified framework: defining the estimators and distributions in [Section 2.1](#) and [Section 2.2](#) respectively, and providing our main result on sample complexity guarantees in [Section 2.3](#). In [Section 3](#), we perform an extensive experimental evaluation of the described estimators, comparing their performance in [Section 3.1](#), and showcasing their effectiveness in higher dimensional settings in [Section 3.2](#).

## 2 A Unified Framework for Provable Shapley Value Estimation

The main theoretical contribution of our paper is a unified framework through which many existing estimators for Shapley value estimation can be understood. We provide *non-asymptotic theoretical*

guarantees for all methods within our framework, including that of the widely used KernelSHAP method.

Towards this end, it is useful to reformulate (1.2) in terms of an ordinary linear regression or a matrix-vector multiplication problem involving a matrix with orthonormal columns. The key observation herein is that any vector  $\phi \in \mathbb{R}^d$  satisfying the constraint  $\mathbf{1}^\top \phi = v([d]) - v(\emptyset)$  can be decomposed as the sum of a vector proportional to  $\mathbf{1}$  (with proportionality constant  $(v([d]) - v(\emptyset))/d$ ) and a vector orthogonal to  $\mathbf{1}$ . By converting (1.2) to an unconstrained problem, we will be able to more easily understand how popular Shapley value estimators can be studied through the lens of randomized numerical linear algebra.

**Theorem 2.1.** *Let  $\mathbf{Q}$  be any fixed  $d \times (d-1)$  matrix whose columns form an orthonormal basis for the space of vectors orthogonal to the all-ones vector (i.e.  $\mathbf{Q}^\top \mathbf{Q} = \mathbf{I}$ ,  $\mathbf{Q}^\top \mathbf{1} = \mathbf{0}$ ). Given  $\lambda \in \mathbb{R}$ , define*

$$\mathbf{U} := \sqrt{\frac{d}{d-1}} \mathbf{Z}' \mathbf{Q}, \quad \alpha := \frac{v([d]) - v(\emptyset)}{d}, \quad \mathbf{b}_\lambda := \sqrt{\frac{d}{d-1}} (\mathbf{b} - \lambda \mathbf{Z}' \mathbf{1}).$$

Then,  $\mathbf{U}^\top \mathbf{U} = \mathbf{I}$  and

$$\phi^* = \mathbf{Q} \operatorname{argmin}_{\mathbf{x} \in \mathbb{R}^{d-1}} \|\mathbf{U} \mathbf{x} - \mathbf{b}_\lambda\|^2 + \alpha \mathbf{1} = \mathbf{Q} \mathbf{U}^\top \mathbf{b}_\lambda + \alpha \mathbf{1}.$$

A similar formulation of the Shapley values in terms of unconstrained regression appears in [MW25]. Theorem 2.1, which is proved in Appendix A.3, goes beyond that of [MW25] in two key ways. First, we observe that by solving the unconstrained problem explicitly, we obtain the solution as the product of a matrix  $\mathbf{Q} \mathbf{U}^\top$  and vector  $\mathbf{b}_\lambda$ . Second, we make the observation that there is complete freedom in the choice of  $\lambda \in \mathbb{R}$ . Together, these advancements allow us to develop a unifying framework for providing provable guarantees for a broad class of randomized estimators which encompasses many existing estimators [CL20; LL17; AJL21; Zha+24; MW25, etc.].

## 2.1 Randomized Estimators Within our Framework

We frame our exposition in the context of *randomized sketching*, a powerful technique which has been studied for decades in randomized numerical linear algebra [Woo+14; MT20].

In the context of Shapley value estimation, a sketching matrix is an  $m \times (2^d - 2)$  matrix  $\mathbf{S}$  where each row has exactly one nonzero entry and  $\mathbb{E}[\mathbf{S}^\top \mathbf{S}] = \mathbf{I}$ . We leave the exact choice of the distribution of  $\mathbf{S}$  general, but discuss several natural choices in Section 2.2. Regardless of the distribution, since each of the  $m$  rows of  $\mathbf{S}$  has exactly one nonzero entry, computing  $\mathbf{S} \mathbf{b}$  requires at most  $m$  evaluations of  $v(S)$ . Thus, estimators which make use of  $\mathbf{S} \mathbf{b}$  can be substantially more efficient to compute when  $m \ll 2^d$ .

Using the sketch  $\mathbf{S} \mathbf{b}_\lambda$  (which can easily be computed from  $\mathbf{S} \mathbf{b}$ ) in the formulations in Theorem 2.1 yields estimators based on *sketched regression* or on *approximate matrix-vector multiplication*.

1. **Sketched Regression:** Methods such as KernelSHAP<sup>5</sup> and LeverageSHAP can be viewed as sketched versions of the regression formulation of the Shapley values:

$$\phi_\lambda^R := \mathbf{Q} \operatorname{argmin}_{\mathbf{x} \in \mathbb{R}^{d-1}} \|\mathbf{S}(\mathbf{U} \mathbf{x} - \mathbf{b}_\lambda)\|^2 + \alpha \mathbf{1}.$$

Given the sketching matrix  $\mathbf{S}$ , this regression (or least squares) estimator can be computed in  $O(md^2 + mT_v)$  time, where  $T_v$  is the time to evaluate an entry of  $\mathbf{b}$ .

2. **Approximate Matrix-Vector Multiplication:** Instead of approximating the regression problem, methods such as unbiased KernelSHAP approximate the closed-form solution  $\mathbf{U}^\top \mathbf{b}_\lambda$  directly:

$$\phi_\lambda^M := \mathbf{Q} \mathbf{U}^\top \mathbf{S}^\top \mathbf{S} \mathbf{b}_\lambda + \alpha \mathbf{1}.$$

This estimator is *unbiased* (provided  $\mathbb{E}[\mathbf{S}^\top \mathbf{S}] = \mathbf{I}$ ) and, given the sketching matrix  $\mathbf{S}$ , can be computed in  $O(md + mT_v)$  time, where  $T_v$  is the time to compute  $v(S)$ .

<sup>5</sup>At first glance it is not obvious that KernelSHAP, which solves an approximation to the *constrained* problem (1.2), can be expressed this way. However, a careful computation (see Appendix B.1) reveals that the KernelSHAP estimator is indeed a special case of the general regression estimator (with  $\lambda = \alpha$ ).

We provide proofs that the estimators from [LL17; CL20; MW25] fit into our framework in [Appendix B](#). Past works, especially [CL20], have used a Lagrangian framework to obtain closed-form solutions to their randomized estimators. While this is mathematically equivalent to our change of variable approach, as described in [Appendix C](#), the expressions, which involve ratios of correlated random variables, are seemingly harder to analyze directly in the Lagrangian framework leading to previous difficulties in providing proofs of KernelSHAP [CL20].

## 2.2 Sampling Schemes for Sketching Matrix

The choice of  $S$  plays a critical role in both the regression and matrix-vector multiplication estimators—which  $m$  entries of  $\mathbf{b}$  are observed impacts what we learn about the Shapley values. However, model-agnostic estimators cannot make strong assumptions about the structure of  $\mathbf{b}$ . The relative importance of the  $i$ -entry of  $\mathbf{b}$  can be encoded in a probability distribution  $\mathcal{P}$  over subsets  $S \subset 2^{[d]} \setminus \{[d], \emptyset\}$ . This distribution is subsequently used to generate  $S$  and hence sample the entries of  $\mathbf{b}$ .<sup>6</sup> In the context of Shapley value estimation, it is common to use further optimizations such as *paired sampling* and *sampling without replacement*, which we explore empirically in [Section 3](#).

Since the values of  $\mathbf{b}$  are costly to observe and are highly dependent on the given model, it is natural to choose the  $\mathcal{P}$  based on  $\mathbf{U}$ . Two popular choices are sampling based on the kernel weights (as done in KernelSHAP), and sampling based on the leverage scores of  $\mathbf{U}$  (as done in LeverageSHAP). We therefore analyze these distributions in our study, along with another distribution that interpolates between these two.

1. **Kernel Weight Sampling:** The KernelSHAP and unbiased KernelSHAP methods use  $p_S \propto k(S)$ . This is a heuristic choice based on the fact that expressions like  $(\mathbf{Z}')^\top \mathbf{Z}'$  and  $(\mathbf{Z}')^\top \mathbf{b}$  can be naturally written as the expectation of certain random variables with respect to this sampling distribution.
2. **Leverage Score /  $\ell_2$ -squared Sampling:** The LeverageSHAP method chooses sampling probabilities proportional to the *statistical leverage scores* of  $\mathbf{U}$ . Since  $\mathbf{U}$  has orthonormal columns, the leverage score of the  $S$ th row of  $\mathbf{U}$  coincides with the squared row-norm  $\|\mathbf{u}_S\|^2$ , which is widely used in the quantum-inspired algorithms framework [Tan19]. Leverage score sampling for sketched regression satisfies strong theoretical guarantees, which [MW25] use to prove guarantees about the LeverageSHAP estimator.
3. **Modified  $\ell_2$  Sampling:** The modified row-norm sampling scheme is obtained by taking the usual geometric mean of kernel weights and leverage scores. The theoretical bounds we derive for these weights are never worse than the bounds for  $\ell_2$ -squared sampling in the worst-case (up to constant factors), but can be up to a factor of  $\sqrt{d}$  better in some cases.

All the above distributions can be thought of special cases of a family of distributions that interpolate between kernel weights and leverage scores. Specifically, given a parameter  $\tau \in [0, 1]$ , we can consider the distribution

$$p_S^\tau \propto (k(S))^\tau (\|\mathbf{u}_S\|^2)^{1-\tau}, \quad (2.1)$$

which is the weighted geometric mean of the kernel weights and the leverage scores (see (A.66) for the full expression).  $\tau = 1$  gives kernel weight distribution,  $\tau = 0$  gives leverage score sampling, while  $\tau = 1/2$  gives modified  $\ell_2$  sampling.

---

<sup>6</sup>The approaches we consider only take into account the relative importance of individual rows. Other approaches (e.g. based on Determinantal Point Processes/volume sampling) take into account the relative importance of entire sets of rows. This results in stronger theoretical guarantees for general regression problems, but such distributions are harder to sample from [DM21].

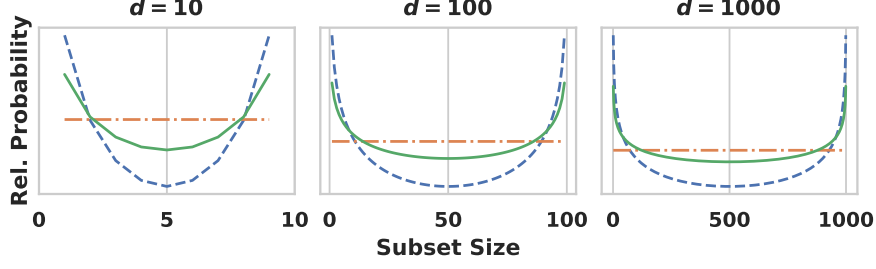

**Figure 1:** Comparison of the sampling probabilities described in Section 2.2. Kernel Weights (dashed), Leverage scores (dash-dot), and our proposed modified  $\ell_2$ -weights (solid), which are the geometric mean of the Kernel Weights and Leverage scores.

**Note:** In the remainder of the study, we interchangeably use the term (modified) row-norm sampling with (modified)  $\ell_2$ -norm sampling, and leverage score sampling with  $\ell_2$ -squared sampling.

### 2.3 Theoretical Guarantees of Shapley Value Approximation

We now provide bounds on the sketching dimension  $m$  required to ensure a Shapley value estimator  $\hat{\phi} \in \{\phi_\lambda^R, \phi_\lambda^M\}$  satisfies a guarantee

$$\mathbb{P}[\|\phi^* - \hat{\phi}\| < \varepsilon] > 1 - \delta, \quad (2.2)$$

for some accuracy parameter  $\varepsilon > 0$  and failure probability parameter  $\delta \in (0, 1)$ .

While there are a number of ways to construct a  $m \times 2^d - 2$  sketching matrix  $S$  from sampling probabilities  $\mathcal{P} = (p_S)_{S \subset [d] \setminus \{[d], \emptyset\}}$ . We analyze two common choices:

1. **With Replacement:** Each of the  $m$  rows of  $S$  are sampled independently. For a given row, a single entry is selected to be nonzero according to  $\mathcal{P}$ . The value of this nonzero entry is  $1/\sqrt{mp_S}$ , where  $S$  is the index of the nonzero row; see Appendix A.2.
2. **Without Replacement:** For each subset  $S$ , we flip a coin that returns heads with probability  $q_S$ . If the coin is heads, we add a row to  $S$ , where the  $S$ -th entry of the row is nonzero and takes value  $1/\sqrt{q_S}$ . The probabilities  $q_S$  are chosen based on the  $\mathcal{P}$  so that, the dimension of the sketching matrix is equal, on average, to some target value  $m$ ; see Appendix A.5.

To reduce the notational burden, we parameterize our bounds in terms of

$$\eta := \max_{S \in 2^{[d]} \setminus \{[d], \emptyset\}} \frac{\|u_S\|^2}{p_S}, \quad \gamma(z) := \sum_{S \in 2^{[d]} \setminus \{[d], \emptyset\}} \frac{\|u_S\|^2}{p_S} (z_S)^2, \quad z \in \mathbb{R}^{2^d - 2}. \quad (2.3)$$

Our main theoretical result, which we prove in Appendix A.3 using techniques from randomized numerical linear algebra [Woo+14; Tro15; MT20], is the following:

**Theorem 2.2.** Define  $P_U := (I - UU^\top)$ , and fix  $\lambda \in \mathbb{R}$ . Let  $m$  denote the sample complexity in the sampling with replacement scenario and the average sample complexity in the sampling without replacement scenario. Then, for the regression estimator,

$$m = O\left(\frac{\gamma(P_U b_\lambda)}{\delta \varepsilon^2} + \eta \log\left(\frac{d}{\delta}\right)\right) \quad \text{guarantees} \quad \mathbb{P}[\|\phi^* - \phi_\lambda^R\| < \varepsilon] > 1 - \delta,$$

and for the matrix-vector multiplication estimator,

$$m = O\left(\frac{\gamma(b_\lambda)}{\delta \varepsilon^2}\right) \quad \text{guarantees} \quad \mathbb{P}[\|\phi^* - \phi_\lambda^M\| < \varepsilon] > 1 - \delta.$$

A direct computation reveals that  $\gamma(P_U b_\lambda) \leq \eta \|P_U b_\lambda\|^2 \leq \eta \|b_\lambda\|^2$ , where the first inequality is by the definition of  $\eta$  and second inequality is due to the fact that  $P_U$  is the orthogonal projector onto the column-span of  $U$ . However, for a particular  $b_\lambda$ , each of these inequalities may not be sharp.



In Table 1, we provide more refined bounds for the kernel weight, leverage score, and modified row-norm sampling probabilities from Section 2.2. More precise bounds are stated and derived in Appendix A.4, and we also give bounds for the family of distributions defined in (2.1) in Remark A.11. Importantly, the bounds for modified row-norm sampling are no worse than leverage scores, but can be up to a factor of  $\sqrt{d}$  better in some cases. Furthermore, up to log factors, the bounds for kernel weights are no worse than both leverage scores and modified row-norm sampling, but can be a factor of  $d/\log(d)$  or  $\sqrt{d}/\log(d)$  better than leverage scores and modified row-norm sampling in some cases, respectively. These observations are formalized in Corollary A.9, and we construct an adversarial model demonstrating such an advantage in the sample complexity bounds in Appendix E. Intuitively, kernel weights and modified row-norm sampling place a larger importance on subsets of small/large size, as seen from Fig. 1. As a result, for models where the entries of the vector  $\mathbf{b}_\lambda$  or  $\mathbf{P}_U \mathbf{b}_\lambda$  are concentrated around subsets of small/large size, kernel weights or modified row-norm sampling would perform better than leverage score sampling, which is the key observation we use for constructing the adversarial model in Appendix E. It remains to be seen whether kernel weights or modified row-norm sampling scheme provides a sample complexity advantage over leverage scores for models used in practice (such as neural networks), and we leave this as an open question for future research.

|                    | $\gamma(\mathbf{P}_U \mathbf{b}_\lambda)$                    | $\gamma(\mathbf{b}_\lambda)$                    | $\eta$      |
|--------------------|--------------------------------------------------------------|-------------------------------------------------|-------------|
| Kernel Weights     | $d \log(d) \ \mathbf{H} \mathbf{P}_U \mathbf{b}_\lambda\ ^2$ | $d \log(d) \ \mathbf{H} \mathbf{b}_\lambda\ ^2$ | $d \log(d)$ |
| Leverage Scores    | $d \ \mathbf{P}_U \mathbf{b}_\lambda\ ^2$                    | $d \ \mathbf{b}_\lambda\ ^2$                    | $d$         |
| Modified row-norms | $d \ \sqrt{\mathbf{H}} \mathbf{P}_U \mathbf{b}_\lambda\ ^2$  | $d \ \sqrt{\mathbf{H}} \mathbf{b}_\lambda\ ^2$  | $d$         |

**Table 1:** Bounds (big- $\Theta$ ) on parameters in Theorem 2.2 for the sampling weights from Section 2.2, derived in Corollary A.10.  $\mathbf{H}$  is a diagonal matrix defined in Corollary A.10 satisfying  $\lambda_{\min}(\mathbf{H}) = \Theta(1/\sqrt{d})$  and  $\lambda_{\max}(\mathbf{H}) = \Theta(1)$ , so that  $\|\mathbf{H} \mathbf{x}\|/\|\mathbf{x}\| \in [\Theta(1/\sqrt{d}), \Theta(1)]$ . Hence, the bounds for kernel sampling are within a  $\log(d)$  factor of leverage score sampling in the worst case, but can be better by a factor  $d/\log(d)$  in some cases. On the other hand, the bounds for modified  $\ell_2$  sampling are never worse than leverage score sampling, but can be better by a factor of  $\sqrt{d}$  in some cases (see Corollary A.9).

### 3 Experiments

Based on our framework, Appendix F describes the pseudo-code of the randomized estimators based on sampling with-replacement Algorithm 1 and without-replacement Algorithm 2. We evaluate these estimators across a range of synthetic and real world settings. Of primary interest is the mean squared error distance from the true Shapley value (normalized:  $\text{mse} = \mathbb{E}[\|\phi^* - \hat{\phi}\|^2]/\|\phi\|^2$ ); we explore the convergence of these estimators to the true Shapley Values. We set out to find the best strategy, but our findings reveal that each method has its own merits across different scenarios. A summary of the experiments is provided here, with details deferred to the following sections.

In the experiments that follow, [MW25] has been re-implemented to (a) allow the methods to be computed in high dimensions efficiently, and (b) to ensure a fair comparison between regression and matrix-vector multiplication method by fixing a single  $\mathbf{SZ}$  for both estimators. We include results from our implementation of KernelSHAP (regression + kernel weights) as well as the implementation of KernelSHAP from the shap library. This particular implementation includes several additional heuristic optimizations.

We run experiments on eight popular tabular datasets from the shap library (up to  $d = 101$ ) and two image datasets (MNIST  $d = 784$ , and CIFAR-10  $d = 3072$ ), details on each dataset are in Appendix G.2. In each dataset, we train an XG-Boost model [CG16] to compute the exact Shapley values using TreeExplainer class in shap [Lun+20]. We report a summary of the experimental findings while leaving detailed experiments to Appendix G.

Following [CL20; MW25], we run our experiments using paired sampling, a simple modification of the estimation procedure, which has been observed to improve empirical performance. In paired

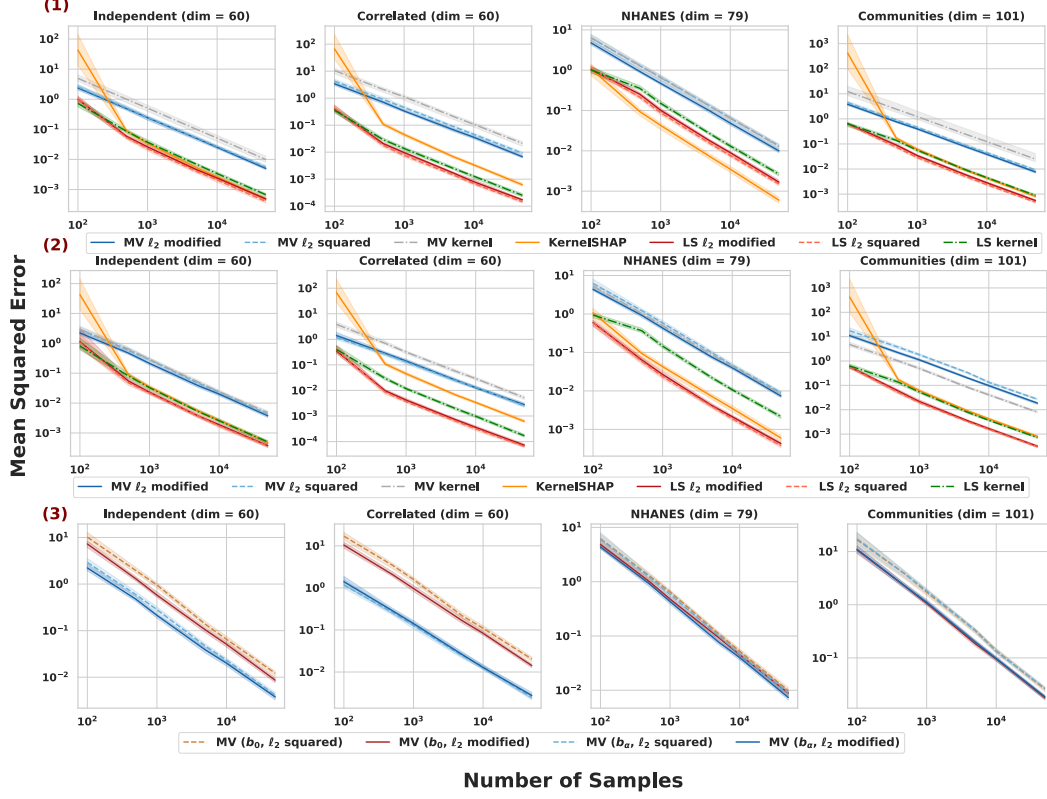

**Figure 2:** Comparison of performance across different estimators. In (1, top row) estimators use *with replacement* sampling strategies. In (2,3, central and bottom row)  $SZ$  is sampled without replacement. In legends, **MV** refers to matrix-vector multiplication estimator and **LS** to regression (least squares) estimator. Dimensions of each datasets are reported with the titles.

sampling, when an index  $S \subset 2^{[d] \setminus \{[d], \emptyset\}}$  is selected, the complement  $S^c = [d] \setminus S$  is also selected. Paired sampling is also used by default in implementation of KernelSHAP from the shap library.

We run our experiments on an AMD EPYC 7R13 processor with 48 cores per socket, 96 CPUs, and 183GB RAM.

### 3.1 Comparisons of Estimators

For each dataset, we choose the first data points of the train and the test sets, according to an 80/20 split, as baseline, and query points for our Shapley estimators respectively. We choose  $m = 10^3, 10^4/2, 10^4, \dots, 10^6/2$  for larger datasets ( $d > 12$ ) and pick specific values of  $m$  for smaller datasets. We run the experiments on random seeds 0, ..., 99 (numpy and Python’s random) for replicability of results. Exact Shapley values are computed with TreeExplainer on the same baseline; KernelExplainer is run without  $\ell_1$  regularization. XG-boost regressors and classifiers are fit with 100 estimators and a maximum tree depth of 10. We highlight key observations in Fig. 2, where we plot median normalized mean squared errors for 100 random seeds, alongside interquantile ranges. Except when specified otherwise, we use  $\lambda = \alpha$ . Detailed results, variations and tables are in Appendix H.1. Our findings are as follows.

- **Matrix-Vector Multiplication vs. Regression Estimator.** We showcase the effectiveness of each Shapley value estimator in practice, reporting a comparison between the best performing distribution in Fig. 2 (1, with replacement; 2 without replacement). The clearest separations across methods appears in the comparison between matrix-vector multiplication and regression estimators. We find that *regression estimator tends to perform better* than matrix-vector multiplication estimator. KernelSHAP is generally positioned between these methods in the ranking. This is highlighted in Fig. 2.



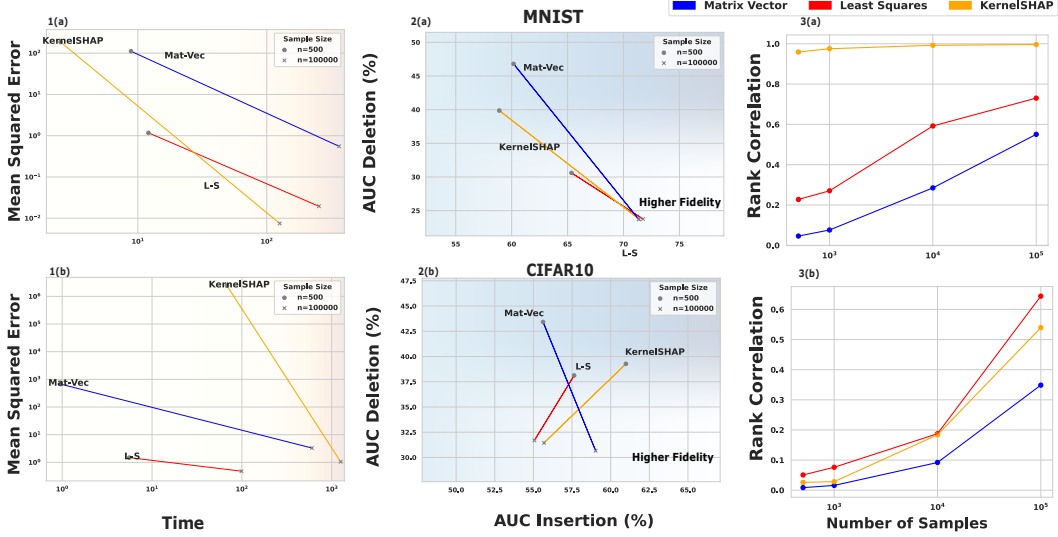

**Figure 3:** Comparison of estimators in image datasets: MNIST (top row) and CIFAR (bottom row). In the first column, (1, left column) performance of estimators is measured with mean squared error (normalized) from true Shapley value and time (in seconds). (2, center column) Area under the curve (AUC) calculation for insertion (x-axis) and deletion curves (y-axis) have been provided, computed on the top 100 features; reported as percentage under the curve. (3, right column) Spearman rank correlation for increasing number of samples.

- **Comparison Across Distributions.** Among the three sampling schemes evaluated, our results in Fig. 2 (1,2) indicate that the  $\ell_2$ -squared method outperforms modified  $\ell_2$  marginally, while outperforming kernel distribution more significantly in both regression and matrix-vector multiplication approximations. As discussed in Section 2.2, the choice of sampling distribution affects the performance of the estimator; with the best choice being problem dependent. In Appendix E, we design a synthetic experiment where estimators based on modified  $\ell_2$  and kernel distributions significantly outperform  $\ell_2$ -squared distribution based estimator.
- **With and Without Replacement Sampling Strategies.** Sampling strategies (with and without replacement) perform similarly for the matrix-vector multiplication estimator. For the regression estimator, sampling with replacement outperforms sampling without replacement on some datasets. However, sampling with replacement strategy is poorly suited for settings where  $m > 2^d$ , since it will perform worse than brute force computation of Shapley values.
- **Comparing  $\lambda=0$  versus  $\lambda=\alpha$  for the Matrix-Vector Multiplication Estimator.** We compare the performance of matrix-vector multiplication estimator using  $\lambda = 0$  and  $\lambda = \alpha$  (i.e.,  $b_0$  vs  $b_\alpha$ ) in Fig. 2 (3). As noted in Appendix B, the unbiased KernelSHAP method of [CL20] uses  $\lambda = 0$ , while the other methods we have explored use  $\lambda = \alpha$ . We find that using  $\lambda = \alpha$  in the estimator leads to better performance.

### 3.2 Provably Efficient Methods in High-Dimensions

For high dimensional datasets, we aim to compare the estimators across faithfulness measures, as well as mean squared error. We compute Shapley values on the first 10 data points from the test sets, using the first data point of the training set, using 80/20 splits. As before, we train a decision tree in order to be able to compare with exact Shapley value computed from the `TreeExplainer` class. For each method, we compare average normalized mean squared error across test points, computational costs and faithfulness of the explanations. Mean squared error is juxtaposed with time (in seconds) in Fig. 3 1(a,b) to emphasize computational tradeoffs between methods. Faithfulness via both area under the curve (AUC) of insertion and deletion curves in Fig. 3 2(a,b), and Spearman rank correlation between exact and estimated Shapley values (as reported in Fig. 3, 3(a,b)). Detailed experimental results with errors can be found in Appendix H.2.

**Algorithmic Innovations.** Approximating Shapley values in high dimensional problems is a challenge. There are two computational bottlenecks in [MW25]: (a) for distributions beyond  $\ell_2$ -squared, combinatorial terms  $\binom{d}{k}$  will cause overflow/underflow for sufficiently large  $d$  and middle  $k$  (i.e.,  $k \sim d/2$ ), and (b) even if we are able to compute the binomial term, [MW25] bucket sampling procedure requires binomial sampling from a distribution with support of size  $\binom{d}{k}$ , which can be large. In our Algorithm 2, we overcome both issues for all distributions by (a) avoiding the computation of the combinatorial terms in the probability distributions and weights, and (b) using Poisson approximation of large binomials to avoid the large support problem. This allows an analysis of our estimators on CIFAR10.

**Estimator Performance.** In Fig. 3 part 1(a-b), experiments confirm that regression estimators generally requires less time and lead to better approximations for fixed number of samples compared to matrix-vector multiplication estimator. Indeed, this discrepancy is accentuated as the dimension size increases. The regression estimator produces accurate estimates even when the number of samples is small, improving on all other estimators.

**Faithfulness.** In Fig. 3 part 2(a-b) and 3(a-b); after 100k samples, we find that for MNIST, all estimators have similar fidelity, but KernelSHAP has very high rank correlation. This may be due to the fact that KernelSHAP first samples from buckets of size 1 and  $d$ , a difference which may be beneficial in this setting. For CIFAR-10, there have been significant increases in rank correlation, showcasing the effectiveness of the estimators. In all settings, we find increased fidelity especially as the dimensionality of the problem increases. We note this could be problem dependent. We report AUC curves in Appendix H.3.

## 4 Discussion

We have provided a theoretical grounding for the use of randomized estimators in the context of Shapley value computation. We have achieved this by means of sample-efficient convergence guarantees for a broad family of estimators, including the popular estimator KernelSHAP and the recently introduced LeverageSHAP. Responsible use of explainable-AI methods involves an understanding of how estimators scale as sample complexity is increased, especially when computing the exact ground truth Shapley values are not computationally feasible. This work on unified framework provides a definitive step in this direction.

**Limitations.** Computing accurate Shapley values remains a challenge. As with past work, the theoretical bounds we derive for Shapley value estimators depend on quantities involving  $\mathbf{b}_\lambda$  (e.g.  $\|\mathbf{b}_\lambda\|$ ) which cannot be computed efficiently. As such, they cannot be instantiated by the user. Below, we give a prescription on how this limitation can be mitigated in practice, but leave a thorough study for future research. Also note that there are several approaches to sampling without replacement and the present work does not provide prescriptions on which to use; this is left to future work.

**Practical Prescription.** As our analysis reveals, the estimators converge in a predictable way with the number of samples ( $m$ ) to the true Shapley value, at the rate of  $\sim 1/\sqrt{m}$ . Therefore, we can use the estimate from a larger value of  $m$  to approximate the error at some  $m_0 \ll m$ . As long as  $m \gg m_0$ , the estimate using  $m$  samples is a good proxy for the true Shapley values, relative to the error of the estimate using  $m_0$  samples. We find that this method, while heuristic, gives a good estimate of the error in practice.

**Future Work.** This work promotes trust in the estimation of Shapley values, promoting a responsible use of the estimators in the explainable-AI community. Our theoretical contributions of a unified framework pave the way for development of tailored estimators depending on the observed entries of  $\mathbf{b}_\lambda$ , which can be used to adapt the sampling distribution accordingly. Developing such adaptive estimators, as well as their theoretical analysis, is left as an interesting direction for future research.

## Acknowledgements

The authors thank Rob Otter and Shaohan Hu for their support and valuable feedback on this project. We also acknowledge our colleagues at the Global Technology Applied Research Center of JPMorganChase, especially Sriram Yechan Gunja and Rajagopal Ganesan, for helpful discussions.

We would also like to thank R. Teal Witter and Christopher Musco for providing us the code for LeverageSHAP [MW25].

## Disclaimer

This paper was prepared for informational purposes by the Global Technology Applied Research center of JPMorgan Chase & Co. This paper is not a merchandisable/sellable product of the Research Department of JPMorgan Chase & Co. or its affiliates. Neither JPMorgan Chase & Co. nor any of its affiliates makes any explicit or implied representation or warranty and none of them accept any liability in connection with this paper, including, without limitation, with respect to the completeness, accuracy, or reliability of the information contained herein and the potential legal, compliance, tax, or accounting effects thereof. This document is not intended as investment research or investment advice, or as a recommendation, offer, or solicitation for the purchase or sale of any security, financial instrument, financial product or service, or to be used in any way for evaluating the merits of participating in any transaction.

## References

- [AJL21] K. Aas, M. Jullum, and A. Løland. “Explaining individual predictions when features are dependent: More accurate approximations to Shapley values”. In: *Artificial Intelligence* 298 (2021), p. 103502 (cit. on pp. 3, 4).
- [Bae+10] D. Baehrens, T. Schroeter, S. Harmeling, M. Kawanabe, K. Hansen, and K.-R. Müller. “How to explain individual classification decisions”. In: *The Journal of Machine Learning Research* (2010) (cit. on p. 1).
- [Bur+16] C. Burton, L. De Boel, C. Kuner, A. Pateraki, S. Cadiot, and S. G. Hoffman. “The final european union general data protection regulation”. In: *BNA Privacy & Security Law Report* (2016) (cit. on p. 1).
- [CG16] T. Chen and C. Guestrin. “Xgboost: A scalable tree boosting system”. In: *Proceedings of the 22nd acm sigkdd international conference on knowledge discovery and data mining*. 2016, pp. 785–794 (cit. on p. 7).
- [CGKR88] A. Charnes, B. Golany, M. Keane, and J. Rousseau. “Extremal Principle Solutions of Games in Characteristic Function Form: Core, Chebychev and Shapley Value Generalizations”. In: *Econometrics of Planning and Efficiency*. Springer Netherlands, 1988, pp. 123–133. URL: [http://dx.doi.org/10.1007/978-94-009-3677-5\\_7](http://dx.doi.org/10.1007/978-94-009-3677-5_7) (cit. on p. 2).
- [CGT09] J. Castro, D. Gómez, and J. Tejada. “Polynomial calculation of the Shapley value based on sampling”. In: *Computers & Operations Research* 36.5 (2009), pp. 1726–1730 (cit. on p. 2).
- [CL20] I. Covert and S.-I. Lee. “Improving kernelSHAP: Practical Shapley value estimation via linear regression”. In: <http://arxiv.org/abs/2012.01536> (2020) (cit. on pp. 3–5, 7, 9, 36).
- [CSWJ18] J. Chen, L. Song, M. J. Wainwright, and M. I. Jordan. “L-Shapley and C-Shapley: Efficient model interpretation for structured data”. In: *arXiv preprint arXiv:1808.02610* (2018) (cit. on pp. 2, 3).
- [DM21] M. Dereziński and M. W. Mahoney. “Determinantal Point Processes in Randomized Numerical Linear Algebra”. In: *Notices of the American Mathematical Society* 68.01 (2021), p. 1. URL: <http://dx.doi.org/10.1090/noti2202> (cit. on p. 5).
- [Fry+20] C. Frye, D. de Mijolla, T. Begley, L. Cowton, M. Stanley, and I. Feige. “Shapley explainability on the data manifold”. In: *arXiv preprint arXiv:2006.01272* (2020) (cit. on p. 3).
- [Fum+24] F. Fumagalli, M. Muschalik, P. Kolpaczki, E. Hüllermeier, and B. Hammer. “KernelSHAP-IQ: Weighted least-square optimization for Shapley interactions”. In: *arXiv preprint arXiv:2405.10852* (2024) (cit. on p. 3).
- [HZFS24] X. Hu, M. Zhu, Z. Feng, and L. Stanković. “Manifold-based Shapley explanations for high dimensional correlated features”. In: *Neural Networks* 180 (2024), p. 106634 (cit. on p. 3).

- [Jet+21] N. Jethani, M. Sudarshan, I. C. Covert, S.-I. Lee, and R. Ranganath. “Fastshap: Real-time Shapley value estimation”. In: *Proceedings of the 38th International Conference on Machine Learning*. 2021 (cit. on p. 3).
- [Kok+21] E. Kokalj, B. Škrlj, N. Lavrač, S. Pollak, and M. Robnik-Šikonja. “BERT meets Shapley: Extending SHAP explanations to transformer-based classifiers”. In: *Proceedings of the EACL hackashop on news media content analysis and automated report generation*. 2021, pp. 16–21 (cit. on p. 3).
- [KTLM24] S. Kariyappa, L. Tsepenekas, F. Lécué, and D. Magazzeni. “SHAP@ k: efficient and probably approximately correct (PAC) identification of top-k features”. In: *Proceedings of the AAAI Conference on Artificial Intelligence*. Vol. 38. 12. 2024, pp. 13068–13075 (cit. on p. 3).
- [KZ22] Y. Kwon and J. Y. Zou. “Weightedshap: analyzing and improving shapley based feature attributions”. In: *Advances in Neural Information Processing Systems* 35 (2022), pp. 34363–34376 (cit. on p. 3).
- [LEL18] S. M. Lundberg, G. G. Erion, and S.-I. Lee. “Consistent individualized feature attribution for tree ensembles”. In: <http://arxiv.org/abs/1802.03888> (2018) (cit. on p. 2).
- [LL17] S. M. Lundberg and S.-I. Lee. “A unified approach to interpreting model predictions”. In: *Proceedings of the 30th Conference on Neural Information Processing Systems (NeurIPS)* (2017) (cit. on pp. 1–5, 36, 40).
- [Lun+20] S. M. Lundberg, G. Erion, H. Chen, A. DeGrave, J. M. Prutkin, B. Nair, R. Katz, J. Himmelfarb, N. Bansal, and S.-I. Lee. “From local explanations to global understanding with explainable AI for trees”. In: *Nature Machine Intelligence* 2.1 (2020), pp. 2522–5839 (cit. on p. 7).
- [MCFH22] R. Mitchell, J. Cooper, E. Frank, and G. Holmes. “Sampling permutations for Shapley value estimation”. In: *Journal of Machine Learning Research* 23.43 (2022), pp. 1–46 (cit. on p. 2).
- [MT20] P.-G. Martinsson and J. A. Tropp. “Randomized numerical linear algebra: Foundations and algorithms”. In: *Acta Numerica* 29 (2020), pp. 403–572. URL: <http://dx.doi.org/10.1017/S0962492920000021> (cit. on pp. 4, 6, 22).
- [MW25] C. Musco and R. T. Witter. “Provably Accurate Shapley Value Estimation via Leverage Score Sampling”. In: *Proceedings of the 13th International Conference on Learning Representations (ICLR)*. 2025. URL: <https://arxiv.org/abs/2410.01917> (cit. on pp. 3–5, 7, 10, 11, 26, 32, 36, 37, 40, 44, 45).
- [OL21] R. Okhrati and A. Lipani. “A multilinear sampling algorithm to estimate Shapley values”. In: *2020 25th International Conference on Pattern Recognition (ICPR)*. IEEE. 2021, pp. 7992–7999 (cit. on p. 2).
- [RSG16] M. T. Ribeiro, S. Singh, and C. Guestrin. ““Why should I trust you?”: Explaining the predictions of any classifier”. In: *Proceedings of the 22nd ACM SIGKDD International Conference on Knowledge Discovery and Data Mining*. 2016 (cit. on p. 1).
- [ŠK14] E. Štrumbelj and I. Kononenko. “Explaining prediction models and individual predictions with feature contributions”. In: *Knowledge and information systems* (2014) (cit. on p. 1).
- [SNS16] E. Song, B. L. Nelson, and J. Staum. “Shapley effects for global sensitivity analysis: Theory and computation”. In: *SIAM/ASA Journal on Uncertainty Quantification* (2016) (cit. on p. 2).
- [Tan19] E. Tang. “A quantum-inspired classical algorithm for recommendation systems”. In: *Proceedings of the 51st annual ACM SIGACT symposium on theory of computing*. 2019, pp. 217–228 (cit. on p. 5).
- [Tro15] J. A. Tropp. “An Introduction to Matrix Concentration Inequalities”. In: *Foundations and Trends® in Machine Learning* 8.1–2 (2015), pp. 1–230. URL: <http://dx.doi.org/10.1561/22000000048> (cit. on pp. 6, 22, 23).
- [WF20] B. Williamson and J. Feng. “Efficient nonparametric statistical inference on population feature importance using Shapley values”. In: *International conference on machine learning*. PMLR. 2020, pp. 10282–10291 (cit. on p. 2).

- [Woo+14] D. P. Woodruff et al. “Sketching as a tool for numerical linear algebra”. In: *Foundations and Trends® in Theoretical Computer Science* (2014) (cit. on pp. 4, 6, 22).
- [Zha+24] B. Zhang, B. Tian, W. Zheng, J. Zhou, and J. Lu. “Fast Shapley Value Estimation: A Unified Approach”. In: (2024). URL: <https://arxiv.org/abs/2311.01010> (cit. on pp. 2–4).

## NeurIPS Paper Checklist

The checklist is designed to encourage best practices for responsible machine learning research, addressing issues of reproducibility, transparency, research ethics, and societal impact. Do not remove the checklist: **The papers not including the checklist will be desk rejected.** The checklist should follow the references and follow the (optional) supplemental material. The checklist does NOT count towards the page limit.

Please read the checklist guidelines carefully for information on how to answer these questions. For each question in the checklist:

- You should answer [Yes], [No], or [NA].
- [NA] means either that the question is Not Applicable for that particular paper or the relevant information is Not Available.
- Please provide a short (1–2 sentence) justification right after your answer (even for NA).

**The checklist answers are an integral part of your paper submission.** They are visible to the reviewers, area chairs, senior area chairs, and ethics reviewers. You will be asked to also include it (after eventual revisions) with the final version of your paper, and its final version will be published with the paper.

The reviewers of your paper will be asked to use the checklist as one of the factors in their evaluation. While "[Yes]" is generally preferable to "[No]", it is perfectly acceptable to answer "[No]" provided a proper justification is given (e.g., "error bars are not reported because it would be too computationally expensive" or "we were unable to find the license for the dataset we used"). In general, answering "[No]" or "[NA]" is not grounds for rejection. While the questions are phrased in a binary way, we acknowledge that the true answer is often more nuanced, so please just use your best judgment and write a justification to elaborate. All supporting evidence can appear either in the main paper or the supplemental material, provided in appendix. If you answer [Yes] to a question, in the justification please point to the section(s) where related material for the question can be found.

IMPORTANT, please:

- **Delete this instruction block, but keep the section heading “NeurIPS Paper Checklist”,**
- **Keep the checklist subsection headings, questions/answers and guidelines below.**
- **Do not modify the questions and only use the provided macros for your answers.**

### 1. Claims

Question: Do the main claims made in the abstract and introduction accurately reflect the paper’s contributions and scope?

Answer: [Yes]

Justification: The abstract and introduction clearly state the claims made and match theoretical and experimental results, reflecting how much said results can be expected to generalize to other settings.

Guidelines:

- The answer NA means that the abstract and introduction do not include the claims made in the paper.
- The abstract and/or introduction should clearly state the claims made, including the contributions made in the paper and important assumptions and limitations. A No or NA answer to this question will not be perceived well by the reviewers.
- The claims made should match theoretical and experimental results, and reflect how much the results can be expected to generalize to other settings.
- It is fine to include aspirational goals as motivation as long as it is clear that these goals are not attained by the paper.

### 2. Limitations

Question: Does the paper discuss the limitations of the work performed by the authors?

Answer: [Yes]



Justification: The paper has a distinct section where limitations of the works are discussed. This was an opportunity for the authors to reflect on scope of the claims and the factors that influence the performance of the approach.

Guidelines:

- The answer NA means that the paper has no limitation while the answer No means that the paper has limitations, but those are not discussed in the paper.
- The authors are encouraged to create a separate "Limitations" section in their paper.
- The paper should point out any strong assumptions and how robust the results are to violations of these assumptions (e.g., independence assumptions, noiseless settings, model well-specification, asymptotic approximations only holding locally). The authors should reflect on how these assumptions might be violated in practice and what the implications would be.
- The authors should reflect on the scope of the claims made, e.g., if the approach was only tested on a few datasets or with a few runs. In general, empirical results often depend on implicit assumptions, which should be articulated.
- The authors should reflect on the factors that influence the performance of the approach. For example, a facial recognition algorithm may perform poorly when image resolution is low or images are taken in low lighting. Or a speech-to-text system might not be used reliably to provide closed captions for online lectures because it fails to handle technical jargon.
- The authors should discuss the computational efficiency of the proposed algorithms and how they scale with dataset size.
- If applicable, the authors should discuss possible limitations of their approach to address problems of privacy and fairness.
- While the authors might fear that complete honesty about limitations might be used by reviewers as grounds for rejection, a worse outcome might be that reviewers discover limitations that aren't acknowledged in the paper. The authors should use their best judgment and recognize that individual actions in favor of transparency play an important role in developing norms that preserve the integrity of the community. Reviewers will be specifically instructed to not penalize honesty concerning limitations.

### 3. Theory assumptions and proofs

Question: For each theoretical result, does the paper provide the full set of assumptions and a complete (and correct) proof?

Answer: [\[Yes\]](#)

Justification: All proofs are provided and are core to the paper. Main theoretical discussions are present in the paper with details in the Supplementary Material.

Guidelines:

- The answer NA means that the paper does not include theoretical results.
- All the theorems, formulas, and proofs in the paper should be numbered and cross-referenced.
- All assumptions should be clearly stated or referenced in the statement of any theorems.
- The proofs can either appear in the main paper or the supplemental material, but if they appear in the supplemental material, the authors are encouraged to provide a short proof sketch to provide intuition.
- Inversely, any informal proof provided in the core of the paper should be complemented by formal proofs provided in appendix or supplemental material.
- Theorems and Lemmas that the proof relies upon should be properly referenced.

### 4. Experimental result reproducibility

Question: Does the paper fully disclose all the information needed to reproduce the main experimental results of the paper to the extent that it affects the main claims and/or conclusions of the paper (regardless of whether the code and data are provided or not)?

Answer: [\[Yes\]](#)

Justification: While all information regarding the experiments, including hyperparameters, experimental seeds, and experimental ranges are provided: mostly in the main body, with details in the Supplementary Material.

Guidelines:

- The answer NA means that the paper does not include experiments.
- If the paper includes experiments, a No answer to this question will not be perceived well by the reviewers: Making the paper reproducible is important, regardless of whether the code and data are provided or not.
- If the contribution is a dataset and/or model, the authors should describe the steps taken to make their results reproducible or verifiable.
- Depending on the contribution, reproducibility can be accomplished in various ways. For example, if the contribution is a novel architecture, describing the architecture fully might suffice, or if the contribution is a specific model and empirical evaluation, it may be necessary to either make it possible for others to replicate the model with the same dataset, or provide access to the model. In general, releasing code and data is often one good way to accomplish this, but reproducibility can also be provided via detailed instructions for how to replicate the results, access to a hosted model (e.g., in the case of a large language model), releasing of a model checkpoint, or other means that are appropriate to the research performed.
- While NeurIPS does not require releasing code, the conference does require all submissions to provide some reasonable avenue for reproducibility, which may depend on the nature of the contribution. For example
  - (a) If the contribution is primarily a new algorithm, the paper should make it clear how to reproduce that algorithm.
  - (b) If the contribution is primarily a new model architecture, the paper should describe the architecture clearly and fully.
  - (c) If the contribution is a new model (e.g., a large language model), then there should either be a way to access this model for reproducing the results or a way to reproduce the model (e.g., with an open-source dataset or instructions for how to construct the dataset).
  - (d) We recognize that reproducibility may be tricky in some cases, in which case authors are welcome to describe the particular way they provide for reproducibility. In the case of closed-source models, it may be that access to the model is limited in some way (e.g., to registered users), but it should be possible for other researchers to have some path to reproducing or verifying the results.

## 5. Open access to data and code

Question: Does the paper provide open access to the data and code, with sufficient instructions to faithfully reproduce the main experimental results, as described in supplemental material?

Answer: [No]

Justification: While code to replicate the experiments will not be shared, thorough implementation details are provided to convey the soundness of results, including model hyperparameters, details on query and baseline selection, and experimental seeds.

Guidelines:

- The answer NA means that paper does not include experiments requiring code.
- Please see the NeurIPS code and data submission guidelines (<https://nips.cc/public/guides/CodeSubmissionPolicy>) for more details.
- While we encourage the release of code and data, we understand that this might not be possible, so “No” is an acceptable answer. Papers cannot be rejected simply for not including code, unless this is central to the contribution (e.g., for a new open-source benchmark).
- The instructions should contain the exact command and environment needed to run to reproduce the results. See the NeurIPS code and data submission guidelines (<https://nips.cc/public/guides/CodeSubmissionPolicy>) for more details.

- The authors should provide instructions on data access and preparation, including how to access the raw data, preprocessed data, intermediate data, and generated data, etc.
- The authors should provide scripts to reproduce all experimental results for the new proposed method and baselines. If only a subset of experiments are reproducible, they should state which ones are omitted from the script and why.
- At submission time, to preserve anonymity, the authors should release anonymized versions (if applicable).
- Providing as much information as possible in supplemental material (appended to the paper) is recommended, but including URLs to data and code is permitted.

## 6. Experimental setting/details

Question: Does the paper specify all the training and test details (e.g., data splits, hyper-parameters, how they were chosen, type of optimizer, etc.) necessary to understand the results?

Answer: [\[Yes\]](#)

Justification: All experimental details are included to provide context for the results and ensure replicability.

Guidelines:

- The answer NA means that the paper does not include experiments.
- The experimental setting should be presented in the core of the paper to a level of detail that is necessary to appreciate the results and make sense of them.
- The full details can be provided either with the code, in appendix, or as supplemental material.

## 7. Experiment statistical significance

Question: Does the paper report error bars suitably and correctly defined or other appropriate information about the statistical significance of the experiments?

Answer: [\[Yes\]](#)

Justification: Each experiment reports the quantiles across runs, median and mean for the discrepancy between true Shapley value and expected Shapley value. Full results are present in the Supplementary Material.

Guidelines:

- The answer NA means that the paper does not include experiments.
- The authors should answer "Yes" if the results are accompanied by error bars, confidence intervals, or statistical significance tests, at least for the experiments that support the main claims of the paper.
- The factors of variability that the error bars are capturing should be clearly stated (for example, train/test split, initialization, random drawing of some parameter, or overall run with given experimental conditions).
- The method for calculating the error bars should be explained (closed form formula, call to a library function, bootstrap, etc.)
- The assumptions made should be given (e.g., Normally distributed errors).
- It should be clear whether the error bar is the standard deviation or the standard error of the mean.
- It is OK to report 1-sigma error bars, but one should state it. The authors should preferably report a 2-sigma error bar than state that they have a 96% CI, if the hypothesis of Normality of errors is not verified.
- For asymmetric distributions, the authors should be careful not to show in tables or figures symmetric error bars that would yield results that are out of range (e.g. negative error rates).
- If error bars are reported in tables or plots, The authors should explain in the text how they were calculated and reference the corresponding figures or tables in the text.

## 8. Experiments compute resources

Question: For each experiment, does the paper provide sufficient information on the computer resources (type of compute workers, memory, time of execution) needed to reproduce the experiments?

Answer: [Yes]

Justification: Detailed description of experiments are present in the main body and in the Supplementary Material. Information on the compute resources are included in the main body. Details of the time of execution are reported.

Guidelines:

- The answer NA means that the paper does not include experiments.
- The paper should indicate the type of compute workers CPU or GPU, internal cluster, or cloud provider, including relevant memory and storage.
- The paper should provide the amount of compute required for each of the individual experimental runs as well as estimate the total compute.
- The paper should disclose whether the full research project required more compute than the experiments reported in the paper (e.g., preliminary or failed experiments that didn't make it into the paper).

## 9. Code of ethics

Question: Does the research conducted in the paper conform, in every respect, with the NeurIPS Code of Ethics <https://neurips.cc/public/EthicsGuidelines>?

Answer: [Yes]

Justification: Having reviewed the NeurIPS Code of Ethics, we attest that the research conducted and the paper conduct with the policies.

Guidelines:

- The answer NA means that the authors have not reviewed the NeurIPS Code of Ethics.
- If the authors answer No, they should explain the special circumstances that require a deviation from the Code of Ethics.
- The authors should make sure to preserve anonymity (e.g., if there is a special consideration due to laws or regulations in their jurisdiction).

## 10. Broader impacts

Question: Does the paper discuss both potential positive societal impacts and negative societal impacts of the work performed?

Answer: [Yes]

Justification: reflections on the impact has have been included in the main body of the text, highlighting the improvements in AI safety that are achieved through our theoretical and practical advancements.

Guidelines:

- The answer NA means that there is no societal impact of the work performed.
- If the authors answer NA or No, they should explain why their work has no societal impact or why the paper does not address societal impact.
- Examples of negative societal impacts include potential malicious or unintended uses (e.g., disinformation, generating fake profiles, surveillance), fairness considerations (e.g., deployment of technologies that could make decisions that unfairly impact specific groups), privacy considerations, and security considerations.
- The conference expects that many papers will be foundational research and not tied to particular applications, let alone deployments. However, if there is a direct path to any negative applications, the authors should point it out. For example, it is legitimate to point out that an improvement in the quality of generative models could be used to generate deepfakes for disinformation. On the other hand, it is not needed to point out that a generic algorithm for optimizing neural networks could enable people to train models that generate Deepfakes faster.

- The authors should consider possible harms that could arise when the technology is being used as intended and functioning correctly, harms that could arise when the technology is being used as intended but gives incorrect results, and harms following from (intentional or unintentional) misuse of the technology.
- If there are negative societal impacts, the authors could also discuss possible mitigation strategies (e.g., gated release of models, providing defenses in addition to attacks, mechanisms for monitoring misuse, mechanisms to monitor how a system learns from feedback over time, improving the efficiency and accessibility of ML).

## 11. Safeguards

Question: Does the paper describe safeguards that have been put in place for responsible release of data or models that have a high risk for misuse (e.g., pretrained language models, image generators, or scraped datasets)?

Answer: [NA]

Justification: The paper does not pose risks for misuse or dual use. The paper promotes AI safety and a deeper understanding of XAI topics: specifically, Shapley-based explanations.

Guidelines:

- The answer NA means that the paper poses no such risks.
- Released models that have a high risk for misuse or dual-use should be released with necessary safeguards to allow for controlled use of the model, for example by requiring that users adhere to usage guidelines or restrictions to access the model or implementing safety filters.
- Datasets that have been scraped from the Internet could pose safety risks. The authors should describe how they avoided releasing unsafe images.
- We recognize that providing effective safeguards is challenging, and many papers do not require this, but we encourage authors to take this into account and make a best faith effort.

## 12. Licenses for existing assets

Question: Are the creators or original owners of assets (e.g., code, data, models), used in the paper, properly credited and are the license and terms of use explicitly mentioned and properly respected?

Answer: [Yes]

Justification: All assets used (code and data) are properly credited to the original developers.

Guidelines:

- The answer NA means that the paper does not use existing assets.
- The authors should cite the original paper that produced the code package or dataset.
- The authors should state which version of the asset is used and, if possible, include a URL.
- The name of the license (e.g., CC-BY 4.0) should be included for each asset.
- For scraped data from a particular source (e.g., website), the copyright and terms of service of that source should be provided.
- If assets are released, the license, copyright information, and terms of use in the package should be provided. For popular datasets, [paperswithcode.com/datasets](https://paperswithcode.com/datasets) has curated licenses for some datasets. Their licensing guide can help determine the license of a dataset.
- For existing datasets that are re-packaged, both the original license and the license of the derived asset (if it has changed) should be provided.
- If this information is not available online, the authors are encouraged to reach out to the asset's creators.

## 13. New assets

Question: Are new assets introduced in the paper well documented and is the documentation provided alongside the assets?

Answer: [NA]

Justification: This paper does not release new assets.

Guidelines:

- The answer NA means that the paper does not release new assets.
- Researchers should communicate the details of the dataset/code/model as part of their submissions via structured templates. This includes details about training, license, limitations, etc.
- The paper should discuss whether and how consent was obtained from people whose asset is used.
- At submission time, remember to anonymize your assets (if applicable). You can either create an anonymized URL or include an anonymized zip file.

#### 14. **Crowdsourcing and research with human subjects**

Question: For crowdsourcing experiments and research with human subjects, does the paper include the full text of instructions given to participants and screenshots, if applicable, as well as details about compensation (if any)?

Answer: [NA]

Justification: This paper does not involve crowdsourcing nor research with human subjects.

Guidelines:

- The answer NA means that the paper does not involve crowdsourcing nor research with human subjects.
- Including this information in the supplemental material is fine, but if the main contribution of the paper involves human subjects, then as much detail as possible should be included in the main paper.
- According to the NeurIPS Code of Ethics, workers involved in data collection, curation, or other labor should be paid at least the minimum wage in the country of the data collector.

#### 15. **Institutional review board (IRB) approvals or equivalent for research with human subjects**

Question: Does the paper describe potential risks incurred by study participants, whether such risks were disclosed to the subjects, and whether Institutional Review Board (IRB) approvals (or an equivalent approval/review based on the requirements of your country or institution) were obtained?

Answer: [NA]

Justification: This paper does not involve crowdsourcing nor research with human subjects.

Guidelines:

- The answer NA means that the paper does not involve crowdsourcing nor research with human subjects.
- Depending on the country in which research is conducted, IRB approval (or equivalent) may be required for any human subjects research. If you obtained IRB approval, you should clearly state this in the paper.
- We recognize that the procedures for this may vary significantly between institutions and locations, and we expect authors to adhere to the NeurIPS Code of Ethics and the guidelines for their institution.
- For initial submissions, do not include any information that would break anonymity (if applicable), such as the institution conducting the review.

#### 16. **Declaration of LLM usage**

Question: Does the paper describe the usage of LLMs if it is an important, original, or non-standard component of the core methods in this research? Note that if the LLM is used only for writing, editing, or formatting purposes and does not impact the core methodology, scientific rigor, or originality of the research, declaration is not required.

Answer: [No]

Justification: The paper does not use LLMs in important, original or non-standard components of the core methods.



Guidelines:

- The answer NA means that the core method development in this research does not involve LLMs as any important, original, or non-standard components.
- Please refer to our LLM policy (<https://neurips.cc/Conferences/2025/LLM>) for what should or should not be described.

---

## Supplementary Material for “A Unified Framework for Provably Efficient Algorithms to Estimate Shapley Values”

---

### A Proofs of the Main Theoretical Results

#### A.1 Notation

It will be convenient to switch from indexing rows by sets  $S \subset 2^{[d]} \setminus \{[d], \emptyset\}$  and instead index by integers  $i \in [2^d - 2]$ . Given  $d \in \mathbb{N}$ , we fix an ordering of the subsets of  $[d]$  according to the size of the subset. Subsets of the same size are ordered in any fixed way (since the sampling probabilities of all distributions we consider only depends on the subset size). We then identify  $i \in [2^d - 2]$  to integers  $(h, l)$  satisfying  $h \in [d - 1]$ ,  $l \in \binom{[d]}{h}$  by

$$i = \sum_{j=1}^{h-1} \binom{d}{j} + l. \quad (\text{A.1})$$

Unless mentioned otherwise,  $e_1, \dots, e_q$  are the standard basis vectors for  $\mathbb{R}^q$ .  $\mathbf{0}$  and  $\mathbf{1}$  are the vectors of all zeros and ones, respectively, while  $\mathbf{I}$  is the identity matrix.  $\|\cdot\|$  denotes the Euclidean norm for vectors, while the spectral norm for matrices.  $\|\cdot\|_F$  denotes the Frobenius norm. Given a matrix  $\mathbf{A}$ ,  $\mathbf{A}^+$  denotes its Moore-Penrose pseudoinverse. Finally, given a matrix  $\mathbf{U}$  with orthonormal columns, we write  $\mathbf{P}_U = \mathbf{I} - \mathbf{U}\mathbf{U}^\top$ .

#### A.2 Proofs from Randomized Numerical Linear Algebra

In this section, we provide bounds for approximate matrix-vector multiplication and sketched regression (least squares) as defined in [Section 2.1](#). Our proofs follow standard techniques in randomized numerical linear algebra [[Woo+14](#); [MT20](#); [Tro15](#)], and are included to illustrate core concepts which may provide a useful starting point for proving theoretical guarantees for more complicated sketching distributions for Shapley value estimation. For simplicity, we analyze the simpler case that  $\mathbf{S}$  has independent rows; i.e. that

$$\mathbf{S} = \frac{1}{\sqrt{m}} \sum_{j=1}^m \frac{1}{\sqrt{p_{I_j}}} e_j (e_{I_j})^\top, \quad (\text{A.2})$$

where  $I_1, \dots, I_m$  are iid copies of a random variable  $I$  for which  $\mathbb{P}[I = k] = p_k$ ,  $k \in [r]$  for some fixed  $r \in \mathbb{N}$ . Note that  $\mathbb{E}[\mathbf{S}^\top \mathbf{S}] = \mathbf{I}$ .

**Proof Sketch:** Prior to diving into the technical details, we present a high-level overview of the strategy used in deriving sample complexity bounds for matrix-vector multiplication and regression estimators.

Given a matrix  $\mathbf{U} \in \mathbb{R}^{r \times q}$  satisfying  $\mathbf{U}^\top \mathbf{U} = \mathbf{I}$ , fixed vectors  $\mathbf{z}, \mathbf{b} \in \mathbb{R}^r$ , our goal is to estimate  $\mathbf{U}^\top \mathbf{z}$  and  $\mathbf{y}^* = \operatorname{argmin}_{\mathbf{y}} \|\mathbf{U}\mathbf{y} - \mathbf{b}\|^2$ .

1. **Approximate Matrix-Vector Multiplication:** Observe that  $\mathbf{U}^\top \mathbf{S}^\top \mathbf{S} \mathbf{z}$  is an unbiased estimator of  $\mathbf{U}^\top \mathbf{z}$ . By computing the variance of this estimator and using Markov’s inequality, we obtain bounds on the sample complexity of estimating  $\mathbf{U}^\top \mathbf{z}$  to a given error (in  $\ell_2$  norm) and confidence level (see [Theorem A.1](#)). Note, in particular, that the term  $\gamma(\mathbf{z})$  (see [\(2.3\)](#)) appearing in the sample complexity is related to the variance of the estimator.
2. **Sketched Regression:** The sketched regression estimator is given by  $\hat{\mathbf{y}} = \operatorname{argmin}_{\mathbf{y}} \|\mathbf{S}(\mathbf{U}\mathbf{y} - \mathbf{b})\|^2$ . To derive sample complexity bounds for estimating  $\mathbf{y}^*$  using  $\hat{\mathbf{y}}$ , we use two main observations. (I) Since  $\mathbf{U}^\top \mathbf{S}^\top \mathbf{S} \mathbf{U}$  is an unbiased estimator of  $\mathbf{I}$ , we can compute the number of samples (using matrix Bernstein’s inequality, [Imported Theorem A.3](#))

to ensure that  $\|U^\top S^\top S U - I\| \leq 1/2$  holds with sufficiently high probability (see [Theorem A.4](#)). Straightforward algebra then gives  $\|\hat{y} - y^*\| \leq 2\|U^\top S^\top S U(\hat{y} - y^*)\|$  with high probability. (II) Since  $S(U\hat{y} - b)$  lies in the orthogonal complement of  $SU$ , we have  $U^\top S^\top (SU\hat{y} - Sb) = 0$ . For a similar reason, we also have  $U^\top (Uy^* - b) = 0$ . It follows that  $U^\top S^\top S U(y^* - \hat{y}) = U^\top S^\top S(Uy^* - b)$ , which is just a sketched matrix-vector multiplication estimator for  $U^\top (Uy^* - b) = 0$ . Consequently, we can use [Theorem A.1](#) to compute the sample complexity for bounding the error  $\|U^\top S^\top S U(\hat{y} - y^*)\|$  with high probability. In particular, since  $U^\top (Uy^* - b) = (I - UU^\top)b = P_U b$ , this explains why we have  $\gamma(P_U b)$  instead of  $\gamma(b)$  in the sample complexity for the sketched regression estimator in [Theorem A.5](#).

Proofs for sampling without replacement, which follow a similar strategy, are described in [Appendix A.5](#).

### A.2.1 Approximate Matrix-Vector Multiplication

We begin with a simple bound on approximate matrix-vector multiplication. This bound immediately gives provable guarantees for the Shapley estimator  $\phi^M$  defined in [Section 2.1](#).

**Theorem A.1** (Matrix-Vector multiplication). *Let  $U \in \mathbb{R}^{r \times q}$  and  $z \in \mathbb{R}^r$ . Let  $S$  be a  $m \times r$  sketching matrix with iid rows drawn according to probability  $\mathcal{P}$ . Then, if*

$$m \geq \left( \gamma(z) - \|U^\top z\|^2 \right) \frac{1}{\delta \varepsilon^2}$$

*it holds that*

$$\mathbb{P}[\|U^\top S^\top S z - U^\top z\| \leq \varepsilon] \geq 1 - \delta.$$

*Proof.* Let  $I_1, \dots, I_m$  denote  $m$  iid random variables that sample indices from  $[r]$  according to probability  $\mathcal{P}$ . Let  $u_1, \dots, u_r$  be the columns of  $U^\top$ , and define  $X_j = u_{I_j} z_{I_j} / p_{I_j}$  for  $j \in [m]$ . Then,  $X_j$  are iid  $d$ -dimensional random vectors. It can be verified that  $\mathbb{E}[X_j] = U^\top z$  for all  $j \in [m]$ . Next, we calculate the variance of the random vector  $X_j$  for  $j \in [m]$ . Using [\(2.3\)](#), observe that

$$\mathbb{E}[\|X_j\|^2] = \sum_{i=1}^r p_i \frac{\|u_i\|^2}{p_i^2} z_i^2 = \gamma(z), \quad (\text{A.3})$$

so that  $\text{var}(X_j) = \mathbb{E}[\|X_j - \mathbb{E}[X_j]\|^2] = \gamma(z) - \|U^\top z\|^2$  for all  $j \in [m]$ . Since  $X_1, \dots, X_m$  are independent and  $(1/m) \sum_{i=1}^m X_i = U^\top S^\top S z$ , we have

$$\mathbb{E}[\|U^\top S^\top S z - U^\top z\|^2] = \mathbb{E} \left[ \left\| \frac{1}{m} \sum_{j=1}^m X_j - \mathbb{E}[X_j] \right\|^2 \right] = \frac{1}{m} \text{var}(X_1). \quad (\text{A.4})$$

Then, using the bound on  $m$ , the result follows by Markov's inequality.  $\square$

**Remark A.2.** When using [Theorem A.1](#) to compute the sample complexity bound in the subsequent proofs in [Appendix A](#), we use

$$m = O \left( \frac{\gamma(z)}{\delta \varepsilon^2} \right) \quad (\text{A.5})$$

*samples. This is, in general, an upper bound on the sample complexity required for approximating the matrix-vector product, and can be tightened by including the term  $\|U^\top z\|^2$ .*

### A.2.2 Subspace Embedding

Before we prove a bound for the sketched regression  $\phi^R$  from [Section 2.1](#), we prove a subspace embedding guarantee.

We begin by recalling the following well-known matrix concentration inequality; see e.g., [\[Tro15, Theorem 6.6.1\]](#).

**Imported Theorem A.3** (Matrix Bernstein's inequality). *Let  $\mathbf{X}_1, \dots, \mathbf{X}_m$  be zero-mean, independent,  $q \times q$  Hermitian random matrices. Then, if  $\|\mathbf{X}_i\| \leq L$  for all  $i \in [m]$ , we have*

$$\mathbb{P}\left[\left\|\sum_{i=1}^m \mathbf{X}_i\right\| \geq \varepsilon\right] \leq q \exp\left(-\frac{\varepsilon^2}{2\|\sum_{i=1}^m \mathbb{E}[\mathbf{X}_i^2]\| + (2L/3)\varepsilon}\right). \quad (\text{A.6})$$

In particular, denoting  $\mathbf{X} = m^{-1} \sum_{i=1}^m \mathbf{X}_i$  and  $\|\sum_{i=1}^m \mathbb{E}[\mathbf{X}_i^2]\| = m\sigma^2$ , if

$$m \geq \left(\frac{2\sigma^2}{\varepsilon^2} + \frac{2L}{3\varepsilon}\right) \log\left(\frac{q}{\delta}\right),$$

it holds that  $\mathbb{P}[\|\mathbf{X}\| \leq \varepsilon] \geq 1 - \delta$ .

By subsampling sufficiently many rows/columns of a matrix, we can obtain an appropriate subspace embedding guarantee.

**Theorem A.4** (Subspace embedding). *Given an  $r \times d$  matrix  $\mathbf{U}$ , let  $\mathbf{u}_1, \dots, \mathbf{u}_r \in \mathbb{R}^d$  denote the columns of  $\mathbf{U}^\top$ . Let  $\mathbf{S}$  be a  $m \times r$  sketching matrix with iid rows drawn according to probability  $\mathcal{P}$ . Then, if*

$$m \geq \frac{2}{\varepsilon^2} \left\| \sum_{i=1}^r \frac{\|\mathbf{u}_i\|^2}{p_i} \mathbf{u}_i \mathbf{u}_i^\top - (\mathbf{U}^\top \mathbf{U})^2 \right\| \log\left(\frac{d}{\delta}\right) + \frac{4}{3\varepsilon} \max_{i \in [r]} \frac{\|\mathbf{u}_i\|^2}{p_i} \log\left(\frac{d}{\delta}\right)$$

it holds that

$$\mathbb{P}[\|\mathbf{U}^\top \mathbf{S}^\top \mathbf{S} \mathbf{U} - \mathbf{U}^\top \mathbf{U}\| \leq \varepsilon] \geq 1 - \delta.$$

*Proof.* First, we write  $\mathbf{U}^\top = (\mathbf{u}_1 \cdots \mathbf{u}_r)$ , where  $\mathbf{u}_i \in \mathbb{R}^d$  is the  $i$ th column of  $\mathbf{U}^\top$  for  $i \in [r]$ . Then,  $\mathbf{U}^\top \mathbf{U} = \sum_{i=1}^r \mathbf{u}_i \mathbf{u}_i^\top$ . Similarly, it can be verified that  $\mathbf{U}^\top \mathbf{S}^\top \mathbf{S} \mathbf{U} = \sum_{i=1}^r \mathbf{u}_{I_i} \mathbf{u}_{I_i}^\top / (mp_{I_i})$ , where  $I_1, \dots, I_m$  are the random variables defining the sketching matrix. It follows that  $\mathbb{E}[\mathbf{U}^\top \mathbf{S}^\top \mathbf{S} \mathbf{U}] = \mathbf{U}^\top \mathbf{U}$ . For convenience, define  $\mathbf{X}_i = \mathbf{u}_{I_i} \mathbf{u}_{I_i}^\top / p_{I_i} - \mathbf{U}^\top \mathbf{U}$  for  $i \in [m]$  and  $\mathbf{X} = \sum_{i=1}^m \mathbf{X}_i / m$ . Then, for all  $i \in [m]$ , we have

$$\|\mathbf{u}_{I_i} \mathbf{u}_{I_i}^\top / p_{I_i}\| \leq \max_{k \in [r]} \frac{\|\mathbf{u}_k\|^2}{p_k} =: L. \quad (\text{A.7})$$

It follows from triangle inequality and Jensen's inequality that  $\|\mathbf{X}_i\| \leq 2L$  for all  $i \in [m]$ . Furthermore, using the fact that  $\mathbf{X}_1, \dots, \mathbf{X}_m$  are iid with zero mean, and symmetric, we have

$$\sum_{i=1}^m \mathbb{E}[\mathbf{X}_i^2] = m \mathbb{E}[\mathbf{X}_1^2] = m \left( \sum_{i=1}^r \|\mathbf{u}_i\|^2 \frac{\mathbf{u}_i \mathbf{u}_i^\top}{p_i} - (\mathbf{U}^\top \mathbf{U})^2 \right). \quad (\text{A.8})$$

Writing  $\|\sum_{i=1}^m \mathbb{E}[\mathbf{X}_i^2]\| = m\sigma^2$ , we have

$$\sigma^2 = \left\| \sum_{i=1}^r \|\mathbf{u}_i\|^2 \frac{\mathbf{u}_i \mathbf{u}_i^\top}{p_i} - (\mathbf{U}^\top \mathbf{U})^2 \right\|. \quad (\text{A.9})$$

The result then follows from **Imported Theorem A.3**.  $\square$

### A.2.3 Sketched Regression

Together, **Theorems A.1** and **A.4** give a bound on sketched regression.

**Theorem A.5** (Sketched Regression). *Suppose  $\mathbf{U}$  has orthonormal columns and let  $\mathbf{y}^* = \arg\min_{\mathbf{y}} \|\mathbf{U}\mathbf{y} - \mathbf{b}\|^2$ . Let  $\mathbf{S}$  be a  $m \times q$  sketching matrix with iid rows drawn according to probability  $\mathcal{P}$ . Define*

$$\hat{\mathbf{y}} = \arg\min_{\mathbf{y}} \|\mathbf{S}\mathbf{U}\mathbf{y} - \mathbf{S}\mathbf{b}\|^2. \quad (\text{A.10})$$

Then, if

$$m = O\left(\frac{\gamma((\mathbf{I} - \mathbf{U}\mathbf{U}^\top)\mathbf{b})}{\delta\varepsilon^2} + \eta \log\left(\frac{d}{\delta}\right)\right),$$

it holds that

$$\mathbb{P}[\|\mathbf{y}^* - \hat{\mathbf{y}}\| \leq \varepsilon] \geq 1 - \delta. \quad (\text{A.11})$$

*Proof.* Since  $\mathbf{y}^*$  is the solution of  $\min_{\mathbf{y}} \|\mathbf{U}\mathbf{y} - \mathbf{b}\|^2$ ,  $\mathbf{U}\mathbf{y}^* - \mathbf{b}$  lies in the orthogonal complement of the range of  $\mathbf{U}$ , and therefore,  $\mathbf{U}^\top(\mathbf{U}\mathbf{y}^* - \mathbf{b}) = \mathbf{0}$ . Then, taking  $\mathbf{z} = \mathbf{U}\mathbf{y}^* - \mathbf{b} = (\mathbf{I} - \mathbf{U}\mathbf{U}^\top)\mathbf{b}$  in [Theorem A.1](#), we can infer that using

$$m = O\left(\frac{\gamma(\mathbf{z})}{\delta\varepsilon^2}\right) \geq \left(\sum_{i=1}^r \frac{\|\mathbf{u}_i\|^2}{p_i} (\mathbf{e}_i^\top (\mathbf{I} - \mathbf{U}\mathbf{U}^\top)\mathbf{b})^2\right) \frac{8}{\delta\varepsilon^2}, \quad (\text{A.12})$$

we have with probability exceeding  $1 - \delta/2$ ,

$$\|\mathbf{U}^\top \mathbf{S}^\top \mathbf{S}(\mathbf{U}\mathbf{y}^* - \mathbf{b})\| \leq \frac{\varepsilon}{2}. \quad (\text{A.13})$$

Next, note that  $\eta = \max_i \|\mathbf{u}_i\|^2/p_i$  so

$$\sum_{i=1}^r \frac{\|\mathbf{u}_i\|^2}{p_i} \mathbf{u}_i \mathbf{u}_i^\top \preceq \eta \sum_{i=1}^r \mathbf{u}_i \mathbf{u}_i^\top = \eta \mathbf{U}^\top \mathbf{U}, \quad (\text{A.14})$$

where  $\mathbf{X} \preceq \mathbf{Y}$  indicates  $\mathbf{Y} - \mathbf{X}$  is positive semi-definite. If  $p_i > \|\mathbf{u}_i\|^2$  for all  $i \in [r]$ , then  $1 > \sum_{i=1}^r \|\mathbf{u}_i\|^2 = \|\mathbf{U}\|_F^2 = d$  (since  $\mathbf{U}^\top \mathbf{U} = \mathbf{I}$ ), which is a contradiction. Thus, we must have  $p_i \leq \|\mathbf{u}_i\|^2$  for some  $i \in [r]$ , or equivalently,  $\eta \geq 1$ . Then, because  $\mathbf{U}$  has orthonormal columns, we have

$$\left\| \sum_{i=1}^r \frac{\|\mathbf{u}_i\|^2}{p_i} \mathbf{u}_i \mathbf{u}_i^\top - (\mathbf{U}^\top \mathbf{U})^2 \right\| \leq (\eta - 1) \|\mathbf{U}^\top \mathbf{U}\| = \eta - 1 \leq \eta. \quad (\text{A.15})$$

Therefore, by [Theorem A.4](#), if

$$m = O\left(\eta \log\left(\frac{d}{\delta}\right)\right) \quad (\text{A.16})$$

$$\geq 8 \left\| \sum_{i=1}^r \frac{\|\mathbf{u}_i\|^2}{p_i} \mathbf{u}_i \mathbf{u}_i^\top - (\mathbf{U}^\top \mathbf{U})^2 \right\| \log\left(\frac{d}{\delta}\right) + \frac{8}{3} \max_{i \in [r]} \frac{\|\mathbf{u}_i\|^2}{p_i} \log\left(\frac{d}{\delta}\right), \quad (\text{A.17})$$

then, with probability exceeding  $1 - \delta/2$ ,

$$\|\mathbf{U}^\top \mathbf{S}^\top \mathbf{S} \mathbf{U} - \mathbf{I}\| \leq 1/2. \quad (\text{A.18})$$

For the remainder of the proof, we condition on [\(A.13\)](#) and [\(A.18\)](#), which, by a union bound, simultaneously occur with probability exceeding  $1 - \delta$ .

Using the triangle inequality, submultiplicativity, and [\(A.18\)](#),

$$\|\mathbf{y}^* - \hat{\mathbf{y}}\| = \|(\mathbf{U}^\top \mathbf{S}^\top \mathbf{S} \mathbf{U})(\mathbf{y}^* - \hat{\mathbf{y}}) + (\mathbf{I} - (\mathbf{U}^\top \mathbf{S}^\top \mathbf{S} \mathbf{U}))(\mathbf{y}^* - \hat{\mathbf{y}})\| \quad (\text{A.19})$$

$$\leq \|(\mathbf{U}^\top \mathbf{S}^\top \mathbf{S} \mathbf{U})(\mathbf{y}^* - \hat{\mathbf{y}})\| + \|(\mathbf{I} - (\mathbf{U}^\top \mathbf{S}^\top \mathbf{S} \mathbf{U}))(\mathbf{y}^* - \hat{\mathbf{y}})\| \quad (\text{A.20})$$

$$\leq \|(\mathbf{U}^\top \mathbf{S}^\top \mathbf{S} \mathbf{U})(\mathbf{y}^* - \hat{\mathbf{y}})\| + \|\mathbf{I} - (\mathbf{U}^\top \mathbf{S}^\top \mathbf{S} \mathbf{U})\| \|\mathbf{y}^* - \hat{\mathbf{y}}\| \quad (\text{A.21})$$

$$\leq \|(\mathbf{U}^\top \mathbf{S}^\top \mathbf{S} \mathbf{U})(\mathbf{y}^* - \hat{\mathbf{y}})\| + \frac{1}{2} \|\mathbf{y}^* - \hat{\mathbf{y}}\|, \quad (\text{A.22})$$

and hence,

$$\|\mathbf{y}^* - \hat{\mathbf{y}}\| \leq 2 \|(\mathbf{U}^\top \mathbf{S}^\top \mathbf{S} \mathbf{U})(\mathbf{y}^* - \hat{\mathbf{y}})\|. \quad (\text{A.23})$$

Next, by the optimality of  $\hat{\mathbf{y}}$  we have that  $(\mathbf{S} \mathbf{U})^\top (\mathbf{S} \mathbf{U} \hat{\mathbf{y}} - \mathbf{S} \mathbf{b}) = \mathbf{0}$  and hence that  $(\mathbf{U}^\top \mathbf{S}^\top \mathbf{S} \mathbf{U}) \hat{\mathbf{y}} = \mathbf{U}^\top \mathbf{S}^\top \mathbf{S} \mathbf{b}$ . Therefore, by [\(A.13\)](#),

$$\|(\mathbf{U}^\top \mathbf{S}^\top \mathbf{S} \mathbf{U})(\mathbf{y}^* - \hat{\mathbf{y}})\| = \|\mathbf{U}^\top \mathbf{S}^\top \mathbf{S}(\mathbf{U}\mathbf{y}^* - \mathbf{b})\| \leq \frac{\varepsilon}{2}. \quad (\text{A.24})$$

Combining the above equations gives the result.  $\square$

### A.3 Proofs for Shapley Value Estimators

As noted in [MW25, Lemma 3.3], the matrix  $\mathbf{Z}'$  nearly has orthonormal columns.

**Lemma A.6.** *Let  $c_d = ((d-1)H_{d-2} - (d-2))/d$ , where  $H_d = \sum_{i=1}^d (1/i)$  is the  $d^{\text{th}}$  harmonic number. Then,*

$$(\mathbf{Z}')^\top \mathbf{Z}' = \frac{d-1}{d} \mathbf{I} + c_d \mathbf{1}\mathbf{1}^\top. \quad (\text{A.25})$$

*Proof.* First, we note that  $(\mathbf{Z}')^\top \mathbf{Z}' = \mathbf{Z}^\top \mathbf{W} \mathbf{Z}$  is a matrix of size  $d \times d$ . Let  $i, j \in \{1, \dots, d\}$ . Then it follows from definition that,

$$[\mathbf{Z}^\top \mathbf{W} \mathbf{Z}]_{ij} = \sum_{S: i, j \in S} k(S) \quad (\text{A.26})$$

We separately consider the case where  $i = j$ . From the above,

$$[\mathbf{Z}^\top \mathbf{W} \mathbf{Z}]_{ii} = \sum_{S: i \in S} k(S) \quad (\text{A.27})$$

$$= \sum_{|S|=1}^{d-1} \frac{(d-1) \binom{d-1}{|S|-1}}{\binom{d}{|S|} |S| (d-|S|)} \quad (\text{A.28})$$

$$= \frac{d-1}{d} \sum_{|S|=1}^{d-1} \frac{1}{d-|S|} = \frac{(d-1)H_{d-1}}{d}, \quad (\text{A.29})$$

Similarly for  $i \neq j$ ,

$$[\mathbf{Z}^\top \mathbf{W} \mathbf{Z}]_{ij} = \sum_{S: i, j \in S} k(S) \quad (\text{A.30})$$

$$= \sum_{|S|=2}^{d-1} \frac{(d-1) \binom{d-2}{|S|-2}}{\binom{d}{|S|} |S| (d-|S|)} \quad (\text{A.31})$$

$$= \frac{1}{d} \sum_{|S|=2}^{d-1} \frac{|S|-1}{d-|S|} \quad (\text{A.32})$$

$$= \frac{1}{d} \sum_{|S|=2}^{d-1} \left( \frac{d-1}{d-|S|} - 1 \right) \quad (\text{A.33})$$

$$= \frac{(d-1)H_{d-2} - (d-2)}{d}. \quad (\text{A.34})$$

Define  $\mathbf{1}$  as the all ones vector in  $\mathbb{R}^d$  and  $\mathbf{I}$  as the identity matrix of size  $d \times d$ . The matrix  $\mathbf{Z}^\top \mathbf{W} \mathbf{Z}$  can then be written as

$$\mathbf{Z}^\top \mathbf{W} \mathbf{Z} = \frac{d-1}{d} \mathbf{I} + \frac{(d-1)H_{d-2} - (d-2)}{d} \mathbf{1}\mathbf{1}^\top, \quad (\text{A.35})$$

which is the desired result.  $\square$

Next, we describe the conversion from the constrained problem (1.2) to an unconstrained problem. Our approach is closely related to [MW25, Lemma 3.1]. However, as noted in Section 2, our approach allows arbitrary  $\lambda$  (where as [MW25] only allows  $\lambda = \alpha$ ). In addition, on a more technical note, we state our results in terms of the argmin of a regression problem involving a full-rank matrix  $\mathbf{U}$ . The result of [MW25] is stated in terms of the argmin of a regression problem involving rank-deficient matrix, which is not uniquely defined. As such, their result implicitly assumes that the argmin returns one particular solution (the minimum norm solution); see Appendix B.3.



**Proof of Theorem 2.1.** Using  $Q^\top \mathbf{1} = \mathbf{0}$ ,  $Q^\top Q = I$ , and (A.25),

$$U^\top U = \frac{d}{d-1} Q^\top (Z')^\top Z' Q = \frac{d}{d-1} Q^\top \left( \frac{d-1}{d} I + c_d \mathbf{1} \mathbf{1}^\top \right) Q = I. \quad (\text{A.36})$$

Therefore,  $(U^\top U)^{-1} U^\top = U^\top$  and so  $Q \operatorname{argmin}_{\mathbf{x} \in \mathbb{R}^{d-1}} \|U\mathbf{x} - \mathbf{b}_\lambda\|^2 + \alpha \mathbf{1} = QU^\top \mathbf{b}_\lambda + \alpha \mathbf{1}$ .

It remains to show these formulations are equivalent to (1.2). Since  $Q^\top \mathbf{1} = \mathbf{0}$  and  $\mathbf{1}^\top \mathbf{1} = d$ , observe that

$$\{\phi : \phi \in \mathbb{R}^d, \mathbf{1}^\top \phi = v([d]) - v(\emptyset)\} = \{Q\mathbf{x} + \alpha \mathbf{1} : \mathbf{x} \in \mathbb{R}^{d-1}\}, \quad (\text{A.37})$$

with the natural bijection  $\phi \leftrightarrow Q\mathbf{x} + \alpha \mathbf{1}$  between  $\phi$  and  $\mathbf{x}$ . Thus, using the definitions of  $U$  and  $\mathbf{b}_\alpha$ ,

$$\phi^* = \operatorname{argmin}_{\substack{\phi \in \mathbb{R}^d \\ \mathbf{1}^\top \phi = v([d]) - v(\emptyset)}} \|Z'\phi - \mathbf{b}\|^2 \quad (\text{A.38})$$

$$= Q \operatorname{argmin}_{\mathbf{x} \in \mathbb{R}^{d-1}} \|Z'(Q\mathbf{x} + \alpha \mathbf{1}) - \mathbf{b}\|^2 + \alpha \mathbf{1} \quad (\text{A.39})$$

$$= Q \operatorname{argmin}_{\mathbf{x} \in \mathbb{R}^{d-1}} \|U\mathbf{x} - \mathbf{b}_\alpha\|^2 + \alpha \mathbf{1}. \quad (\text{A.40})$$

Now, since  $Q^\top \mathbf{1} = \mathbf{0}$ ,

$$U^\top Z' \mathbf{1} = Q^\top (Z')^\top Z' \mathbf{1} = Q^\top \left( \frac{d-1}{d} I + c_d \mathbf{1} \mathbf{1}^\top \right) \mathbf{1} = \mathbf{0}. \quad (\text{A.41})$$

Therefore, for any  $\lambda$ ,

$$\operatorname{argmin}_{\mathbf{x} \in \mathbb{R}^{d-1}} \|U\mathbf{x} - \mathbf{b}_\lambda\|^2 = \operatorname{argmin}_{\mathbf{x} \in \mathbb{R}^{d-1}} \|U\mathbf{x} - (\mathbf{b} - \lambda Z' \mathbf{1})\|^2 = \operatorname{argmin}_{\mathbf{x} \in \mathbb{R}^{d-1}} \|U\mathbf{x} - \mathbf{b}\|^2. \quad (\text{A.42})$$

This gives the desired result.  $\square$

Finally, we use Theorem 2.1 and the bounds from Appendix A.2 to prove our main approximation guarantee.

**Proof of Theorem 2.2.** We analyze the estimators individually. Recall from Theorem 2.1 that

$$\phi^* = Q \operatorname{argmin}_{\mathbf{x} \in \mathbb{R}^{d-1}} \|U\mathbf{x} - \mathbf{b}_\lambda\|^2 + \alpha \mathbf{1} = QU^\top \mathbf{b}_\lambda + \alpha \mathbf{1}. \quad (\text{A.43})$$

We will use both of these formulations.

**Regression:** Observe,

$$\phi_\lambda^R = Q \operatorname{argmin}_{\mathbf{x} \in \mathbb{R}^{d-1}} \|S(U\mathbf{x} - \mathbf{b}_\lambda)\|^2 + \alpha \mathbf{1} = Q(SU)^\top S\mathbf{b}_\lambda + \alpha \mathbf{1}.$$

Now, since  $Q^\top Q = I$ ,

$$\|\phi^* - \phi_\lambda^R\| = \|QU^\top \mathbf{b}_\lambda - Q(SU)^\top S\mathbf{b}_\lambda\| = \|U^\top \mathbf{b}_\lambda - (SU)^\top S\mathbf{b}_\lambda\|. \quad (\text{A.44})$$

By Theorem A.5, if

$$m = O\left(\frac{\gamma(P_U \mathbf{b}_\lambda)}{\delta \varepsilon^2} + \eta \log\left(\frac{d}{\delta}\right)\right), \quad (\text{A.45})$$

then

$$\mathbb{P}[\|U^\top \mathbf{b}_\lambda - (SU)^\top S\mathbf{b}_\lambda\|^2 \leq \varepsilon] \geq 1 - \delta.$$

**Matrix-Vector Multiplication:** By definition,

$$\phi_\lambda^M = QU^\top S^\top S\mathbf{b}_\lambda + \alpha \mathbf{1}. \quad (\text{A.46})$$

Then, since  $Q^\top Q = I$ ,

$$\|\phi^* - \phi_\lambda^M\| = \|QU^\top \mathbf{b}_\lambda - QU^\top S^\top S\mathbf{b}_\lambda\| = \|U^\top \mathbf{b}_\lambda - U^\top S^\top S\mathbf{b}_\lambda\|. \quad (\text{A.47})$$

By Theorem A.1, if

$$m = O\left(\frac{\gamma(\mathbf{b}_\lambda)}{\delta \varepsilon^2}\right) \geq \left(\sum_{i=1}^r \frac{\|u_i\|^2}{p_i} ((\mathbf{b}_\lambda)_i)^2 - \|U^\top \mathbf{b}_\lambda\|^2\right) \frac{1}{\delta \varepsilon^2} \quad (\text{A.48})$$

then

$$\mathbb{P}[\|U^\top \mathbf{b}_\lambda - U^\top S^\top S\mathbf{b}_\lambda\| < \varepsilon] > 1 - \delta. \quad (\text{A.49})$$

This establishes the result.  $\square$

#### A.4 Fine-grained bounds for specific probability distributions

**Theorem A.7.** Map the index  $i \in [2^d - 2]$  to integers  $(h, l)$  satisfying  $h \in [d - 1]$ ,  $l \in [\binom{d}{h}]$ , as  $i = \sum_{j=1}^{h-1} \binom{d}{j} + l$ . Then, we have

$$\|\mathbf{u}_i\|^2 = \|\mathbf{u}_{h,l}\|^2 = \frac{1}{\binom{d}{h}} \quad (\text{A.50})$$

for all  $l \in [\binom{d}{h}]$  and all  $h \in [d - 1]$ . Moreover,

1. ( **$\ell_2$ -squared**) For  $h \in [d - 1]$  and  $l \in [\binom{d}{h}]$ , we have

$$p_{h,l} = \frac{\|\mathbf{u}_{h,l}\|^2}{\|\mathbf{U}\|_F^2} = \frac{1}{(d-1)\binom{d}{h}},$$

$$\gamma(\mathbf{z}) = (d-1)\|\mathbf{z}\|^2 \quad \text{and} \quad \eta = d-1.$$

2. (**Kernel**) For  $h \in [d - 1]$  and  $l \in [\binom{d}{h}]$ , denoting  $k(h) = (d-1)/(\binom{d}{h}(h(d-h)))$  we have

$$p_{h,l} = \frac{k(h)}{\sum_{j=1}^{d-1} k(j)\binom{d}{j}} = \frac{1}{\binom{d}{h}} \frac{\frac{1}{h(d-h)}}{\sum_{j=1}^{d-1} \frac{1}{j(d-j)}},$$

$$\gamma(\mathbf{z}) = \frac{2}{d} \left( \sum_{h=1}^{d-1} \frac{1}{h} \right) \sum_{h=1}^{d-1} \sum_{l=1}^{\binom{d}{h}} h(d-h) z_{h,l}^2 \quad \text{and} \quad \eta \leq \frac{d}{2} \sum_{h=1}^{d-1} \frac{1}{h}.$$

3. (**Modified  $\ell_2$** ) For  $h \in [d - 1]$  and  $l \in [\binom{d}{h}]$ , we have

$$p_{h,l} = \frac{\sqrt{k(h)}\|\mathbf{u}_{h,l}\|}{\sum_{j=1}^{d-1} \sum_{l=1}^{\binom{d}{j}} \sqrt{k(j)}\|\mathbf{u}_{j,l}\|} = \frac{1}{\binom{d}{h}} \frac{\frac{1}{\sqrt{h(d-h)}}}{\sum_{j=1}^{d-1} \frac{1}{\sqrt{j(d-j)}}},$$

$$\gamma(\mathbf{z}) = \left( \sum_{h=1}^{d-1} \frac{1}{\sqrt{h(d-h)}} \right) \sum_{h=1}^{d-1} \sum_{l=1}^{\binom{d}{h}} \sqrt{h(d-h)} z_{h,l}^2 \quad \text{and} \quad \eta \leq \frac{d}{2} \sum_{h=1}^{d-1} \frac{1}{\sqrt{h(d-h)}}.$$

*Proof.* Denote  $r = 2^d - 2$ , and let  $\mathbf{e}_1, \dots, \mathbf{e}_r \in \mathbb{R}^d$  be the standard basis vectors. Since  $\mathbf{u}_1, \dots, \mathbf{u}_r$  are the columns of  $\mathbf{U}^\top$ , we can write  $\mathbf{u}_i = \mathbf{U}^\top \mathbf{e}_i$  for all  $i \in [r]$ . It follows that

$$\|\mathbf{u}_i\|^2 = \mathbf{e}_i^\top \mathbf{U} \mathbf{U}^\top \mathbf{e}_i = \frac{d}{d-1} \mathbf{e}_i^\top \sqrt{\mathbf{W}} \mathbf{Z} \mathbf{P} \mathbf{Z}^\top \sqrt{\mathbf{W}} \mathbf{e}_i. \quad (\text{A.51})$$

Now, we map  $i$  to  $(h, l)$  for appropriate integers  $h \in [d - 1]$  and  $l \in [\binom{d}{h}]$ , so that the subset  $S_i \subset [d]$  is of size  $h$  (according to the chosen ordering of subsets). Then, writing  $k(h) = k(S_i)$ , we have  $\mathbf{Z}^\top \sqrt{\mathbf{W}} \mathbf{e}_{h,l} = \sqrt{k(h)} \mathbf{Z}^\top \mathbf{e}_{h,l} = \sqrt{k(h)} \mathbf{z}_{h,l}$ , where  $\mathbf{z}_{h,l}$  is a  $d$ -dimensional vector with 1 at entry  $j$  if  $j \in S_{h,l}$  and 0 otherwise. Substituting this in (A.51), using  $\mathbf{P} = \mathbf{I} - (1/d)\mathbf{1}\mathbf{1}^\top$  and  $|S_{h,l}| = \|\mathbf{z}_{h,l}\|_1 = \|\mathbf{z}_{h,l}\|^2 = h$ , we obtain

$$\begin{aligned} \|\mathbf{u}_i\|^2 &= \frac{d}{d-1} k(h) \left( \|\mathbf{z}_{h,l}\|^2 - \frac{1}{d} \|\mathbf{z}_{h,l}\|_1^2 \right) \\ &= \frac{d}{d-1} \frac{d-1}{\binom{d}{h} h(h-d)} \left( h - \frac{h^2}{d} \right) \\ &= \frac{1}{\binom{d}{h}}. \end{aligned} \quad (\text{A.52})$$

1. It can be verified that  $\sum_{i=1}^{2^d-1} \|\mathbf{u}_i\|^2 = \|\mathbf{U}_F\|^2 = d-1$ . The result follow from the definition of  $p_{h,l}$ , and  $\gamma, \eta$  in (2.3).

2. Noting that  $k(S)$  depends only on the size of the subset  $S \subseteq [d]$ ,  $p_{h,l}$  in [Item 2](#) is obtained by direct calculation. Observe that

$$\sum_{h=1}^{d-1} \frac{1}{h(d-h)} = \frac{1}{d} \sum_{h=1}^{d-1} \left( \frac{1}{h} + \frac{1}{d-h} \right) = \frac{2}{d} \sum_{h=1}^{d-1} \frac{1}{h}, \quad (\text{A.53})$$

and therefore,

$$\frac{\|\mathbf{u}_{h,l}\|^2}{p_{h,l}} = \left( \frac{2}{d} \sum_{h=1}^{d-1} \frac{1}{h} \right) h(d-h), \quad (\text{A.54})$$

for  $h \in [d-1]$  and  $l \in \binom{[d]}{h}$ . Since  $h(d-h) \leq d^2/4$  for  $h \in [d-1]$ , [Item 2](#) follows from (2.3) by direct substitution.

3. We obtain  $p_{h,l}$  in [Item 3](#) by direct substitution. Since

$$\frac{\|\mathbf{u}_{h,l}\|^2}{p_{h,l}} = \left( \sum_{h=1}^{d-1} \frac{1}{\sqrt{h(d-h)}} \right) \sqrt{h(d-h)} \quad (\text{A.55})$$

for  $h \in [d-1]$  and  $l \in \binom{[d]}{h}$ , we obtain [Item 3](#).  $\square$

**Remark A.8.** The sum over  $1/h$  in [Item 2](#) and over  $1/\sqrt{h(d-h)}$  in [Item 3](#) only mildly depend on  $d$ . Indeed,

$$\sum_{h=1}^{d-1} \frac{1}{h} = \Theta(\log(d)) \quad \text{and} \quad \sum_{h=1}^{d-1} \frac{1}{\sqrt{h(d-h)}} = \Theta(1). \quad (\text{A.56})$$

This can be seen from the (well-known) bound

$$\log(d) = \int_1^d \frac{1}{x} dx \leq \sum_{h=1}^{d-1} \frac{1}{h} = 1 + \sum_{h=2}^{d-1} \frac{1}{h} \leq 1 + \int_1^{d-1} \frac{1}{x} dx = 1 + \log(d-1), \quad (\text{A.57})$$

where the approximation with the integral uses the fact that  $h \mapsto 1/h$  is a decreasing function. Similarly, since  $\lceil (d-1)/2 \rceil \leq d/2$ , we have

$$\begin{aligned} \sum_{h=1}^{d-1} \frac{1}{\sqrt{h(d-h)}} &\leq 2 \sum_{h=1}^{\lceil (d-1)/2 \rceil} \frac{1}{\sqrt{h(d-h)}} \\ &\leq 2 \left( \frac{1}{\sqrt{d-1}} + \int_1^{d/2} \frac{1}{\sqrt{x(d-x)}} dx \right) \\ &= 2 \left( \frac{1}{\sqrt{d-1}} + 2 \arctan(\sqrt{d-1}) - \frac{\pi}{2} \right) \xrightarrow{d \rightarrow \infty} \pi, \end{aligned} \quad (\text{A.58})$$

and since  $\lfloor (d-1)/2 \rfloor \geq d/2 - 1$ , we have

$$\begin{aligned} \sum_{h=1}^{d-1} \frac{1}{\sqrt{h(d-h)}} &\geq 2 \sum_{h=1}^{\lfloor (d-1)/2 \rfloor} \frac{1}{h(d-h)} \\ &\geq 2 \left( \int_1^{d/2} \frac{1}{\sqrt{x(d-x)}} dx \right) \\ &= 2 \left( 2 \arctan(\sqrt{d-1}) - \frac{\pi}{2} \right) \xrightarrow{d \rightarrow \infty} \pi. \end{aligned} \quad (\text{A.59})$$

[Theorem A.7](#) allows us to directly compare the values of  $\gamma$  for the different sampling strategies we consider.

**Corollary A.9.** Denote  $\gamma_{\ell_2^2}$ ,  $\gamma_{\text{ker}}$ ,  $\gamma_{\text{m-}\ell_2}$  to be the expressions for  $\gamma$  for  $\ell_2$ -squared *Item 1*, kernel *Item 2*, and modified  $\ell_2$  *Item 3* sampling schemes respectively. Then, for all  $\mathbf{z} \in \mathbb{R}^{2^d-2}$ , we have

$$\Theta\left(\frac{\log(d)}{d}\right) \leq \frac{\gamma_{\text{ker}}(\mathbf{z})}{\gamma_{\ell_2^2}(\mathbf{z})} \leq \Theta(\log(d)), \quad (\text{A.60})$$

$$\Theta\left(\frac{1}{\sqrt{d}}\right) \leq \frac{\gamma_{\text{m-}\ell_2}(\mathbf{z})}{\gamma_{\ell_2^2}(\mathbf{z})} \leq \Theta(1), \quad (\text{A.61})$$

and

$$\Theta\left(\frac{\log(d)}{\sqrt{d}}\right) \leq \frac{\gamma_{\text{ker}}(\mathbf{z})}{\gamma_{\text{m-}\ell_2}(\mathbf{z})} \leq \Theta(\log(d)). \quad (\text{A.62})$$

*Proof.* Since  $d-1 \leq h(d-h) \leq d^2/4$  for all  $h \in [d-1]$ , we have

$$(d-1)\|\mathbf{z}_{h,l}\|^2 \leq \sum_{h=1}^{d-1} \sum_{l=1}^{\binom{d}{h}} h(d-h)z_{h,l}^2 \leq (d^2/4)\|\mathbf{z}_{h,l}\|^2 \quad (\text{A.63})$$

and

$$\sqrt{d-1}\|\mathbf{z}_{h,l}\|^2 \leq \sum_{h=1}^{d-1} \sum_{l=1}^{\binom{d}{h}} \sqrt{h(d-h)}z_{h,l}^2 \leq (d/2)\|\mathbf{z}_{h,l}\|^2. \quad (\text{A.64})$$

Similarly, since  $(\sqrt{d-1}/d)\sqrt{h(d-h)} \leq h(d-h)/d \leq (1/2)\sqrt{h(d-h)}$  for  $h \in [d-1]$ , we have

$$\sqrt{d-1} \sum_{h=1}^{d-1} \sum_{l=1}^{\binom{d}{h}} \sqrt{h(d-h)}z_{h,l}^2 \leq \sum_{h=1}^{d-1} \sum_{l=1}^{\binom{d}{h}} h(d-h)z_{h,l}^2 \leq \frac{d}{2} \sum_{h=1}^{d-1} \sum_{l=1}^{\binom{d}{h}} \sqrt{h(d-h)}z_{h,l}^2. \quad (\text{A.65})$$

Then, (A.60), (A.61), and (A.62) follow from [Theorem A.7](#) and [Remark A.8](#).  $\square$

These bounds suggest that kernel weights perform at most a log factor worse than leverage scores, while it can perform nearly  $d$  better than leverage scores. On the other hand, the performance of modified  $\ell_2$  weights is never worse than leverage scores (up to constant factors), but can nearly do  $\sqrt{d}$  better than leverage scores. In [Appendix E](#), we explicitly construct a toy model that demonstrates such an advantage. While these results are only upper bounds on the sample complexities, we also observe similar results in experiments. Using [Theorem A.7](#), we can derive the values of  $\gamma$  and  $\eta$  listed in [Table 1](#) for the different sampling strategies as follows.

**Corollary A.10.** Define  $\mathbf{H}$  to be a  $(2^d-2) \times (2^d-2)$  dimensional diagonal matrix with diagonal entries

$$\mathbf{H}_{(h,l),(h,l)} = \frac{\sqrt{h(d-h)}}{d}$$

for  $h \in [d-1]$  and  $l \in [\binom{d}{h}]$ , so that

$$\lambda_{\min}(\mathbf{H}) = \Theta\left(\frac{1}{\sqrt{d}}\right) \quad \text{and} \quad \lambda_{\max}(\mathbf{H}) = \Theta(1).$$

Then, we have the following expressions for  $\gamma(\mathbf{z})$  and  $\eta$  for all  $\mathbf{z} \in \mathbb{R}^{2^d-2}$ .

1. ( $\ell_2$ -squared)

$$\gamma(\mathbf{z}) = \Theta(d\|\mathbf{z}\|^2) \quad \text{and} \quad \eta = \Theta(d).$$

2. (Kernel)

$$\gamma(\mathbf{z}) = \Theta(d \log(d) \|\mathbf{H}\mathbf{z}\|^2) \quad \text{and} \quad \eta = \Theta(d \log(d)).$$

3. (Modified  $\ell_2$ )

$$\gamma(\mathbf{z}) = \Theta(d\|\sqrt{\mathbf{H}}\mathbf{z}\|_2^2) \quad \text{and} \quad \eta = \Theta(d).$$

*Proof.* This follows from [Theorem A.7](#), [Remark A.8](#) and the definition of  $\mathbf{H}$ .  $\square$

**Remark A.11.** The distributions considered in [Theorem A.7](#) are actually a special case of a family of distributions, obtained by interpolating between kernel weights and leverage scores. Specifically, given  $\tau \in [0, 1]$ , we can consider the weighted geometric mean  $(k(h))^\tau (\|\mathbf{u}_{h,l}\|^2)^{(1-\tau)}$  of  $k(h)$  and  $\|\mathbf{u}_{h,l}\|^2$  for  $h \in [d-1]$  and  $l \in \binom{[d]}{h}$ . This gives rise to the distribution

$$p_{h,l}^\tau = \frac{1}{\binom{d}{h}} \frac{\left(\frac{1}{h(d-h)}\right)^\tau}{\sum_{j=1}^{d-1} \left(\frac{1}{j(d-j)}\right)^\tau}. \quad (\text{A.66})$$

For  $\tau = 0$ , we get the leverage scores (or  $\ell_2$ -squared distribution),  $\tau = 1$  gives the kernel weight distribution, and  $\tau = 1/2$  gives the modified  $\ell_2$  distribution.

Denoting

$$\mathcal{N}_\tau = \sum_{j=1}^{d-1} \left(\frac{1}{j(d-j)}\right)^\tau \quad (\text{A.67})$$

to be the normalization factor, we have

$$\frac{\|\mathbf{u}_{h,l}\|^2}{p_{h,l}^\tau} = (h(d-h))^\tau \mathcal{N}_\tau \quad (\text{A.68})$$

for  $h \in [d-1]$  and  $l \in \binom{[d]}{h}$ . It follows that

$$\eta_\tau = \begin{cases} \left(\frac{d^2}{4}\right)^\tau \mathcal{N}_\tau & \text{if } d \text{ is even} \\ \left(\frac{d^2-1}{4}\right)^\tau \mathcal{N}_\tau & \text{if } d \text{ is odd,} \end{cases} \quad (\text{A.69})$$

and

$$\gamma_\tau(\mathbf{z}) = \mathcal{N}_\tau \sum_{h,l} (h(d-h))^\tau z_{h,l}^2 \quad (\text{A.70})$$

for  $\mathbf{z} \in \mathbb{R}^{2^d-2}$ .

Using similar arguments as in [Remark A.8](#), we can show that

$$\mathcal{N}_\tau = \begin{cases} \Theta(d^{1-2\tau}) & \text{if } 0 \leq \tau < 1 \\ \Theta\left(\frac{\log(d)}{d}\right) & \text{if } \tau = 1. \end{cases} \quad (\text{A.71})$$

Here, we used the fact that

$$\int_1^{d/2} \frac{1}{(x(d-x))^\tau} dx = d^{1-2\tau} (B_{1/2}(1-\tau, 1-\tau) - B_{1/d}(1-\tau, 1-\tau)) = \Theta(d^{1-2\tau}) \quad (\text{A.72})$$

for  $0 \leq \tau < 1$ , where  $B_z(a, b) = \int_0^z t^{a-1} (1-t)^{b-1} dt$  is the incomplete beta function.

Therefore, we have

$$\gamma_\tau(\mathbf{z}) = \Theta(d \|\mathbf{H}^\tau \mathbf{z}\|^2) \text{ and } \eta_\tau = \Theta(d) \quad (\text{A.73})$$

for  $0 \leq \tau < 1$ , and

$$\gamma_\tau(\mathbf{z}) = \Theta(d \log(d) \|\mathbf{H}^\tau \mathbf{z}\|^2) \text{ and } \eta_\tau = \Theta(d \log(d)) \quad (\text{A.74})$$

for  $\tau = 1$ . For  $0 \leq \tau < 1$ , we do no worse than leverage score sampling. We remark that because the  $\Theta$  notation hides constants, for a given dimension, one can choose an appropriate  $\tau$  that minimizes these constants. It remains to see how such a strategy performs in practice.

## A.5 Theoretical guarantees for sampling without replacement

In this section, we prove guarantees for matrix vector multiplication estimator and the regression estimator when the rows/columns are sampled without replacement.<sup>7</sup> We follow the strategy of [MW25] for sampling indices without replacement.

Let  $U$  be an  $r \times q$  dimensional matrix, with rows  $\mathbf{u}_1, \dots, \mathbf{u}_r \in \mathbb{R}^q$ . To sample the rows of  $U$  without replacement, we suppose that we have  $r$  independent Bernoulli random variables  $Y_1, \dots, Y_r$ , where  $Y_i$  has mean  $q_i > 0$  for  $i \in [r]$ . We interpret  $Y_i = 1$  as having picked the  $i$ th row, and  $Y_i = 0$  as not having picked the  $i$ th row. The expected number of samples (or rows) is  $m_0 = \sum_{i=1}^r q_i$ . Thus, on an average, we will sample  $m_0$  rows, none of which are the same. Observe that while we can control the expected number of samples by choosing the probabilities  $q_1, \dots, q_r$ , the actual number of samples  $m$  we draw is random. If  $i_1, \dots, i_m$  are the (distinct) indices we pick, then the sketching matrix  $S$  is  $m \times r$  dimensional, with  $j$ th row having the element  $1/\sqrt{q_{i_j}}$  at location  $i_j$  and zero elsewhere for  $j \in [m]$ . Note that an important feature of such a sampling without replacement scheme is that the probabilities  $q_1, \dots, q_r$  need *not* sum to 1 because they independently determine whether or not a given row is picked.

### A.5.1 Approximate Matrix-Vector Multiplication

We derive the following guarantee for the matrix-vector multiplication estimator for sampling without replacement. Since the number of samples are not fixed, we instead calculate the estimation error for a fixed expected number of samples (which is determined by the probabilities  $q_1, \dots, q_r$ ).

**Theorem A.12** (Matrix-Vector multiplication, sampling without replacement). *Given a matrix  $U \in \mathbb{R}^{r \times q}$  and a vector  $\mathbf{z} \in \mathbb{R}^r$ , let  $S$  be an  $m \times r$  dimensional sketching matrix constructed by sampling rows of  $U$  without replacement according to probabilities  $q_1, \dots, q_r$ . Then, using an expected number of samples  $\sum_{i=1}^r q_i$ , we have*

$$\mathbb{P}[\|U^T S^T S \mathbf{z} - U^T \mathbf{z}\| \leq \varepsilon] \geq 1 - \delta$$

for

$$\varepsilon = \sqrt{\frac{1}{\delta} \sum_{i=1}^r \left( \frac{1}{q_i} - 1 \right) \|\mathbf{u}_i\|^2 z_i^2}. \quad (\text{A.75})$$

*Proof.* Let  $Y_1, \dots, Y_r$  be independent Bernoulli random variables with means  $q_1, \dots, q_r$  respectively. Then, the random variable

$$\widehat{\mathbf{X}} = U^T S^T S \mathbf{z} = \sum_{i=1}^r Y_i \frac{\mathbf{u}_i z_i}{q_i} \quad (\text{A.76})$$

is an unbiased estimator of  $U^T \mathbf{z}$ . Denote  $\text{var}(\widehat{\mathbf{X}}) = \mathbb{E}[\|\widehat{\mathbf{X}} - \mathbb{E}[\widehat{\mathbf{X}}]\|^2]$  to be variance of  $\widehat{\mathbf{X}}$ . Then, since all  $Y_1, \dots, Y_r$  are independent, we have

$$\text{var}(\widehat{\mathbf{X}}) = \sum_{i=1}^r \text{var}\left(Y_i \frac{\mathbf{u}_i z_i}{q_i}\right) \quad (\text{A.77})$$

$$= \sum_{i=1}^r \left( \frac{1}{q_i} - 1 \right) \|\mathbf{u}_i\|^2 z_i^2. \quad (\text{A.78})$$

Since  $\text{var}(\widehat{\mathbf{X}}) = \mathbb{E}[\|\widehat{\mathbf{X}} - \mathbb{E}[\widehat{\mathbf{X}}]\|_2^2]$ , by Markov's inequality, we have

$$\mathbb{P}[\|\widehat{\mathbf{X}} - \mathbb{E}[\widehat{\mathbf{X}}]\| \geq \varepsilon] \leq \frac{\text{var}(\widehat{\mathbf{X}})^2}{\varepsilon^2} = \frac{1}{\varepsilon^2} \sum_{i=1}^r \left( \frac{1}{q_i} - 1 \right) \|\mathbf{u}_i\|^2 z_i^2. \quad (\text{A.79})$$

Setting the right-hand-side of the above inequality equal to  $\delta$  and solving for  $\varepsilon$  gives us (A.75).  $\square$

We can use the above result to derive the error bounds in terms of the function  $\gamma(\mathbf{z})$  defined in (2.3).

<sup>7</sup>We note that the term “sampling without replacement” is perhaps a bit of a misnomer for this type of sampling scheme. Nevertheless, we use it in order to maintain consistency with [MW25].



**Corollary A.13.** Let  $\mathcal{P} = (p_1, \dots, p_r)$  be a probability distribution on  $[r]$  with  $p_i > 0$  for all  $i \in [r]$ . Given a number  $m_0 \in (0, r]$ , let  $c > 0$  be a constant for which  $q_i = \min\{1, cp_i\}$  for  $i \in [r]$  and  $\sum_{i=1}^r q_i = m_0$ . Then, given error  $\varepsilon > 0$  and confidence level  $1 - \delta \in (0, 1)$ , if

$$m_0 \geq \frac{\gamma(\mathbf{z})}{\delta \varepsilon^2},$$

by sampling the rows of  $\mathbf{U}$  without replacement according to probabilities  $q_1, \dots, q_r$ , we have

$$\mathbb{P}[\|\mathbf{U}^\top \mathbf{S}^\top \mathbf{S} \mathbf{z} - \mathbf{U}^\top \mathbf{z}\| \leq \varepsilon] \geq 1 - \delta.$$

*Proof.* First, note that by the continuity of  $c \mapsto \min\{1, cp_i\}$  for all  $i \in [r]$ , given a real number  $m_0 \in (0, r]$ , there is always some  $c > 0$  for which  $\sum_{i=1}^r \min\{1, cp_i\} = m_0$  by the intermediate value theorem. Furthermore,  $m_0 = \sum_{i=1}^r \min\{1, cp_i\} \leq c$ , since  $\sum_{i=1}^r p_i = 1$ . Therefore, we have

$$\begin{aligned} \frac{1}{\delta} \sum_{i=1}^r \left( \frac{1}{q_i} - 1 \right) \|\mathbf{u}_i\|^2 z_i^2 &\leq \frac{1}{\delta} \sum_{\substack{i=1 \\ q_i < 1}}^r \frac{\|\mathbf{u}_i\|^2 z_i^2}{q_i} \\ &= \frac{1}{c\delta} \sum_{\substack{i=1 \\ q_i < 1}}^r \frac{\|\mathbf{u}_i\|^2 z_i^2}{p_i} \\ &\leq \frac{1}{c\delta} \sum_{i=1}^r \frac{\|\mathbf{u}_i\|^2 z_i^2}{p_i} \\ &\leq \frac{\gamma(\mathbf{z})}{m_0 \delta} \leq \varepsilon^2, \end{aligned} \tag{A.80}$$

where we use the fact that  $q_i = cp_i$  when  $q_i < 1$  in the second line, the fact that the terms are non-negative in the third line, and the definition of  $\gamma$  (see (2.3)) and  $c \geq m_0$  in the third line. The result then follows from Theorem A.12.  $\square$

**Remark A.14.** We can derive a tighter bound on the expected sample complexity for sampling without replacement as

$$m_0 \geq \frac{1}{\delta \varepsilon^2} \sum_{\substack{i=1 \\ q_i < 1}}^r \frac{\|\mathbf{u}_i\|^2 z_i^2}{p_i}.$$

Intuitively, when  $q_i = 1$ , we (deterministically) choose the  $i$ th row of  $\mathbf{U}$ , and therefore, it should not add to the estimation error, which is then reflected in the average sample complexity. Thus, in practice, we may observe a somewhat smaller error for sampling without replacement on an average, compared to sampling with replacement.

## A.5.2 Subspace Embedding

In this section, we derive a subspace embedding guarantee for sampling without replacement.

**Theorem A.15** (Subspace embedding). Let  $\mathbf{U}$  be an  $r \times d$  matrix with rows  $\mathbf{u}_1, \dots, \mathbf{u}_r$ , and let  $\mathcal{P} = (p_1, \dots, p_r)$  be a probability distribution on  $[r]$  with  $p_i > 0$  for all  $i \in [r]$ . Given a number  $m_0 \in (0, r]$ , let  $c > 0$  be a constant for which  $q_i = \min\{1, cp_i\}$  for  $i \in [r]$  and  $\sum_{i=1}^r q_i = m_0$ . Then, if

$$m_0 \geq \frac{2}{\varepsilon^2} \left\| \sum_{i=1}^r \frac{\|\mathbf{u}_i\|^2}{p_i} \mathbf{u}_i \mathbf{u}_i^\top \right\| \log\left(\frac{d}{\delta}\right) + \frac{2}{3\varepsilon} \max_{i \in [r]} \frac{\|\mathbf{u}_i\|^2}{p_i} \log\left(\frac{d}{\delta}\right),$$

by sampling the rows of  $\mathbf{U}$  without replacement according to probabilities  $q_1, \dots, q_r$ , it holds that

$$\mathbb{P}[\|\mathbf{U}^\top \mathbf{S}^\top \mathbf{S} \mathbf{U} - \mathbf{U}^\top \mathbf{U}\| \leq \varepsilon] \geq 1 - \delta.$$

*Proof.* Let  $Y_1, \dots, Y_r$  be independent Bernoulli random variables with means  $q_1, \dots, q_r$  respectively. For  $i \in [r]$ , define the random variable

$$\mathbf{X}_i = \frac{Y_i}{q_i} \mathbf{u}_i \mathbf{u}_i^\top - \mathbf{u}_i \mathbf{u}_i^\top. \tag{A.81}$$

If  $q_i = 1$ , then  $Y_i = 1$ , so that  $\mathbf{X}_i = 0$ . Therefore, we have

$$\|\mathbf{X}_i\| \leq \max_{\substack{i \in [r] \\ q_i < 1}} \left| \frac{Y_i}{q_i} - 1 \right| \|\mathbf{u}_i\|^2 \quad (\text{A.82})$$

$$\leq \max_{\substack{i \in [r] \\ q_i < 1}} \frac{\|\mathbf{u}_i\|^2}{q_i} \quad (\text{A.83})$$

$$= \frac{1}{c} \max_{\substack{i \in [r] \\ q_i < 1}} \frac{\|\mathbf{u}_i\|^2}{p_i} \quad (\text{A.84})$$

$$\leq \frac{1}{c} \max_{i \in [r]} \frac{\|\mathbf{u}_i\|^2}{p_i} \quad (\text{A.85})$$

$$\leq \frac{1}{m_0} \max_{i \in [r]} \frac{\|\mathbf{u}_i\|^2}{p_i} =: \frac{L}{m_0} \quad (\text{A.86})$$

for all  $i \in [r]$ . Here, the third line follows from the fact that  $q_i = cp_i$  when  $q_i < 1$ , while the last line follows from the fact that  $m_0 = \sum_{i=1}^r \min\{1, cp_i\} \leq c$  since  $\sum_{i=1}^r p_i = 1$ .

Next, note that  $\mathbb{E}[\mathbf{X}_i] = 0$  and  $\sum_{i=1}^r \mathbf{X}_i = \mathbf{U}^\top \mathbf{S}^\top \mathbf{S} \mathbf{U} - \mathbf{U}^\top \mathbf{U}$ . Furthermore, we have

$$\mathbb{E}[\mathbf{X}_i^2] = \left( q_i \left( 1 - \frac{1}{q_i} \right)^2 + (1 - q_i) \right) \|\mathbf{u}_i\|^2 \mathbf{u}_i \mathbf{u}_i^\top = \frac{(1 - q_i)}{q_i} \|\mathbf{u}_i\|^2 \mathbf{u}_i \mathbf{u}_i^\top \quad (\text{A.87})$$

for all  $i \in [r]$ . Therefore, we have

$$\sum_{i=1}^r \mathbb{E}[\mathbf{X}_i^2] \preceq \sum_{\substack{i=1 \\ q_i < 1}}^r \frac{\|\mathbf{u}_i\|^2}{q_i} \mathbf{u}_i \mathbf{u}_i^\top \quad (\text{A.88})$$

$$= \frac{1}{c} \sum_{\substack{i=1 \\ q_i < 1}}^r \frac{\|\mathbf{u}_i\|^2}{p_i} \mathbf{u}_i \mathbf{u}_i^\top \quad (\text{A.89})$$

$$\preceq \frac{1}{c} \sum_{i=1}^r \frac{\|\mathbf{u}_i\|^2}{p_i} \mathbf{u}_i \mathbf{u}_i^\top \quad (\text{A.90})$$

$$\preceq \frac{1}{m_0} \sum_{i=1}^r \frac{\|\mathbf{u}_i\|^2}{p_i} \mathbf{u}_i \mathbf{u}_i^\top. \quad (\text{A.91})$$

It follows that

$$\left\| \sum_{i=1}^r \mathbb{E}[\mathbf{X}_i^2] \right\| \leq \frac{1}{m_0} \left\| \sum_{i=1}^r \frac{\|\mathbf{u}_i\|^2}{p_i} \mathbf{u}_i \mathbf{u}_i^\top \right\| =: \frac{\sigma^2}{m_0}. \quad (\text{A.92})$$

The result then follows from [Imported Theorem A.3](#).  $\square$

### A.5.3 Sketched Regression

We now combine approximate matrix-vector multiplication guarantee ([Corollary A.13](#)) and subspace embedding guarantee ([Theorem A.15](#)) to obtain guarantee for the sketched regression estimator constructed by sampling without replacement.

**Theorem A.16** (Sketched Regression). *Suppose  $\mathbf{U}$  has orthonormal columns and let  $\mathbf{y}^* = \arg\min_{\mathbf{y}} \|\mathbf{U}\mathbf{y} - \mathbf{b}\|^2$ . Let  $\mathcal{P} = (p_1, \dots, p_r)$  be a probability distribution on  $[r]$  with  $p_i > 0$  for all  $i \in [r]$ . Given a number  $m_0 \in (0, r]$ , let  $c > 0$  be a constant for which  $q_i = \min\{1, cp_i\}$  for  $i \in [r]$  and  $\sum_{i=1}^r q_i = m_0$ . Let  $\mathbf{S}$  be a  $m \times q$  sketching matrix obtained by sampling rows of  $\mathbf{U}$  without replacement according to probabilities  $q_1, \dots, q_r$ . Define*

$$\hat{\mathbf{y}} = \arg\min_{\mathbf{y}} \|\mathbf{S}\mathbf{U}\mathbf{y} - \mathbf{S}\mathbf{b}\|^2.$$

Then, if

$$m_0 = O\left(\frac{\gamma(\mathbf{P}_U \mathbf{b})}{\delta \varepsilon^2} + \eta \log\left(\frac{d}{\delta}\right)\right),$$

it holds that

$$\mathbb{P}[\|\mathbf{y}^* - \hat{\mathbf{y}}\| \leq \varepsilon] \geq 1 - \delta.$$

*Proof.* We closely follow the proof of [Theorem A.5](#). Since  $\mathbf{y}^*$  is the solution of  $\min_{\mathbf{y}} \|\mathbf{U}\mathbf{y} - \mathbf{b}\|^2$ ,  $\mathbf{U}\mathbf{y}^* - \mathbf{b}$  lies in the orthogonal complement of the range of  $\mathbf{U}$ , and therefore,  $\mathbf{U}^\top(\mathbf{U}\mathbf{y}^* - \mathbf{b}) = 0$ . Then, taking  $\mathbf{z} = \mathbf{U}\mathbf{y}^* - \mathbf{b} = (\mathbf{I} - \mathbf{U}\mathbf{U}^\top)\mathbf{b}$  in [Corollary A.13](#), we can infer that using

$$m_0 = O\left(\frac{\gamma(\mathbf{z})}{\delta \varepsilon^2}\right), \quad (\text{A.93})$$

we have with probability exceeding  $1 - \delta/2$ ,

$$\|\mathbf{U}^\top \mathbf{S}^\top \mathbf{S}(\mathbf{U}\mathbf{y}^* - \mathbf{b})\| \leq \frac{\varepsilon}{2}. \quad (\text{A.94})$$

Next, note that  $\eta = \max_i \|\mathbf{u}_i\|^2 / p_i$ , so that

$$\sum_{i=1}^r \frac{\|\mathbf{u}_i\|^2}{p_i} \mathbf{u}_i \mathbf{u}_i^\top \preceq \eta \sum_{i=1}^r \mathbf{u}_i \mathbf{u}_i^\top = \eta \mathbf{U}^\top \mathbf{U}. \quad (\text{A.95})$$

Then, because  $\mathbf{U}$  has orthonormal columns, we have

$$\left\| \sum_{i=1}^r \frac{\|\mathbf{u}_i\|^2}{p_i} \mathbf{u}_i \mathbf{u}_i^\top \right\| \leq \eta \|\mathbf{U}^\top \mathbf{U}\| = \eta. \quad (\text{A.96})$$

Therefore, by [Theorem A.15](#), if

$$m_0 = O\left(\eta \log\left(\frac{d}{\delta}\right)\right) \quad (\text{A.97})$$

$$\geq 8 \left\| \sum_{i=1}^r \frac{\|\mathbf{u}_i\|^2}{p_i} \mathbf{u}_i \mathbf{u}_i^\top \right\| \log\left(\frac{d}{\delta}\right) + \frac{4}{3} \max_{i \in [r]} \frac{\|\mathbf{u}_i\|^2}{p_i} \log\left(\frac{d}{\delta}\right), \quad (\text{A.98})$$

then, with probability exceeding  $1 - \delta/2$ ,

$$\|\mathbf{U}^\top \mathbf{S}^\top \mathbf{S} \mathbf{U} - \mathbf{I}\| \leq 1/2. \quad (\text{A.99})$$

The remainder of the proof is the same as that of [Theorem A.5](#).  $\square$

## B Description of past estimators

In this section we provide more details on how several existing estimators fit into the unified framework described in [Section 2](#).

### B.1 KernelSHAP

KernelSHAP makes use of a subsampled and reweighted version of the constrained regression formulation (1.2) of the Shapley values. Specifically, denoting  $\mathbf{Z}_S$  to be the  $S$ -th row of  $\mathbf{Z}$ , observe that

$$\begin{aligned} \|\mathbf{Z}'\phi - \mathbf{b}\|^2 &= \sum_{S \in 2^{[d]} \setminus \{[d], \emptyset\}} k(S) (\mathbf{Z}_S \phi - \mathbf{v}_S)^2 \\ &= \left[ \sum_{S \in 2^{[d]} \setminus \{[d], \emptyset\}} k(S) \right] \mathbb{E}[(\mathbf{Z}_{S'} \phi - \mathbf{v}_{S'})^2], \end{aligned} \quad (\text{B.1})$$

where in the last equation  $S'$  is a random variable for which  $\mathbb{P}[S' = S] \propto k(S)$  for  $S \subseteq [d]$ ,  $S \neq \emptyset, [d]$ . Note that

$$\underset{\substack{\phi \in \mathbb{R}^d \\ \mathbf{1}^\top \phi = v([d]) - v(\emptyset)}}{\operatorname{argmin}} \|\mathbf{Z}'\phi - \mathbf{b}\|^2 = \underset{\substack{\phi \in \mathbb{R}^d \\ \mathbf{1}^\top \phi = v([d]) - v(\emptyset)}}{\operatorname{argmin}} \mathbb{E}[(\mathbf{Z}_{S'}\phi - \mathbf{v}_{S'})^2],$$

because the minima of a function  $f$  coincide with the minima of  $\zeta f$  for  $\zeta > 0$ .

The KernelSHAP estimator [LL17] is then defined as

$$\phi^{\text{KS}} = \underset{\substack{\phi \in \mathbb{R}^d \\ \mathbf{1}^\top \phi = v([d]) - v(\emptyset)}}{\operatorname{argmin}} \frac{1}{m} \sum_{i=1}^m (\mathbf{Z}_{S_i}\phi - \mathbf{v}_{S_i})^2, \quad (\text{B.2})$$

where  $S_i$  are iid copies of  $S'$ .

As noted by [MW25], this can be viewed as a constrained sketched regression problem

$$\phi^{\text{KS}} = \underset{\substack{\phi \in \mathbb{R}^d \\ \mathbf{1}^\top \phi = v([d]) - v(\emptyset)}}{\operatorname{argmin}} \|\mathbf{S}(\mathbf{Z}'\phi - \mathbf{b})\|^2 \quad (\text{B.3})$$

Performing the same change of variables as in the proof of Theorem 2.1 we find that

$$\phi^{\text{KS}} = \mathbf{Q} \underset{\mathbf{x} \in \mathbb{R}^{d-1}}{\operatorname{argmin}} \|\mathbf{S}(\mathbf{Z}'(\mathbf{Q}\mathbf{x} + \alpha\mathbf{1}) - \mathbf{b})\|^2 + \alpha\mathbf{1} \quad (\text{B.4})$$

$$= \mathbf{Q} \underset{\mathbf{x} \in \mathbb{R}^{d-1}}{\operatorname{argmin}} \|\mathbf{S}(\mathbf{Z}'\mathbf{Q}\mathbf{x} - (\mathbf{b} - \alpha\mathbf{Z}'\mathbf{1}))\|^2 + \alpha\mathbf{1} \quad (\text{B.5})$$

$$= \mathbf{Q} \underset{\mathbf{x} \in \mathbb{R}^{d-1}}{\operatorname{argmin}} \|\mathbf{S}(\mathbf{U}\mathbf{x} - \mathbf{b}_\alpha)\|^2 + \alpha\mathbf{1}. \quad (\text{B.6})$$

## B.2 Unbiased KernelSHAP

In [CL20], the authors observe that the Shapley values can be expressed as

$$\phi^* = \mathbf{A}^{-1} \left( \mathbf{f} - \mathbf{1} \frac{\mathbf{1}^\top \mathbf{A}^{-1} \mathbf{f} - v([d]) + v(\emptyset)}{\mathbf{1}^\top \mathbf{A}^{-1} \mathbf{1}} \right) \quad (\text{B.7})$$

where

$$\mathbf{A} = \mathbf{Z}^\top \mathbf{W} \mathbf{Z}, \quad \mathbf{f} = \mathbf{Z}^\top \mathbf{W} \mathbf{b}. \quad (\text{B.8})$$

They then introduce the *unbiased KernelSHAP* estimator

$$\phi^{\text{uKS}} = \mathbf{A}^{-1} \left( \hat{\mathbf{f}} - \mathbf{1} \frac{\mathbf{1}^\top \mathbf{A}^{-1} \hat{\mathbf{f}} - v([d]) + v(\emptyset)}{\mathbf{1}^\top \mathbf{A}^{-1} \mathbf{1}} \right), \quad \hat{\mathbf{f}} = \mathbf{Z}^\top \sqrt{\mathbf{W}} \mathbf{S}^\top \mathbf{S} \sqrt{\mathbf{W}} \mathbf{b}. \quad (\text{B.9})$$

Expanding, we see that

$$\phi^{\text{uKS}} = \mathbf{A}^{-1} \hat{\mathbf{f}} - \frac{\mathbf{A}^{-1} \mathbf{1} \mathbf{1}^\top \mathbf{A}^{-1}}{\mathbf{1}^\top \mathbf{A}^{-1} \mathbf{1}} \hat{\mathbf{f}} + \mathbf{A}^{-1} \mathbf{1} \frac{v([d]) + v(\emptyset)}{\mathbf{1}^\top \mathbf{A}^{-1} \mathbf{1}} \quad (\text{B.10})$$

Since  $[\mathbf{Q}, d^{-1/2}\mathbf{1}]$  form an orthonormal basis for  $\mathbb{R}^d$ ,

$$\mathbf{A}^{-1} = \left( \frac{d-1}{d} \mathbf{Q} \mathbf{Q}^\top + (d-1+dc_d) \frac{\mathbf{1} \mathbf{1}^\top}{d} \right)^{-1} = \frac{d}{d-1} \mathbf{Q} \mathbf{Q}^\top + (d-1+dc_d)^{-1} \frac{\mathbf{1} \mathbf{1}^\top}{d}. \quad (\text{B.11})$$

Using this, we see that

$$\mathbf{A}^{-1} \mathbf{1} = (d-1+dc_d)^{-1} \mathbf{1}, \quad \mathbf{1}^\top \mathbf{A}^{-1} \mathbf{1} = d(d-1+dc_d)^{-1}. \quad (\text{B.12})$$

We now compute

$$\mathbf{A}^{-1} \hat{\mathbf{f}} = \frac{d}{d-1} \mathbf{Q} \mathbf{Q}^\top \hat{\mathbf{f}} + (d-1+dc_d)^{-1} \frac{\mathbf{1} \mathbf{1}^\top}{d} \hat{\mathbf{f}}, \quad (\text{B.13})$$

$$\frac{\mathbf{A}^{-1} \mathbf{1} \mathbf{1}^\top \mathbf{A}^{-1}}{\mathbf{1}^\top \mathbf{A}^{-1} \mathbf{1}} = \frac{(d-1+dc_d)^{-2} \mathbf{1} \mathbf{1}^\top}{d(d-1+dc_d)^{-1}} = \frac{(d-1+dc_d)^{-1} \mathbf{1} \mathbf{1}^\top}{d}, \quad (\text{B.14})$$

and

$$\mathbf{A}^{-1} \mathbf{1} \frac{v([d]) + v(\emptyset)}{\mathbf{1}^\top \mathbf{A}^{-1} \mathbf{1}} = \frac{(d-1+dc_d)^{-1} \mathbf{1}}{d(d-1+dc_d)^{-1}} = \frac{\mathbf{1}}{d}. \quad (\text{B.15})$$

Combining these equations we have

$$\phi^{\text{uKS}} = \frac{d}{d-1} \mathbf{Q} \mathbf{Q}^\top \mathbf{Z}^\top \sqrt{\mathbf{W}} \mathbf{S}^\top \mathbf{S} \sqrt{\mathbf{W}} \mathbf{b} + \frac{v([d]) - v(\emptyset)}{d} \mathbf{1}. \quad (\text{B.16})$$

### B.3 LeverageSHAP

In [MW25], the authors show the typical formulation of the Shapley values (1.2) can be rewritten as an unconstrained problem

$$\phi^* = \underset{\phi \in \mathbb{R}^d}{\operatorname{argmin}} \|A\phi - b_\alpha\|^2 + \alpha \mathbf{1}, \quad (\text{B.17})$$

where

$$A = Z'P, \quad P := I - d^{-1}\mathbf{1}\mathbf{1}^\top = QQ^\top. \quad (\text{B.18})$$

They then describe a randomized estimator *LeverageSHAP* of the form

$$\phi^{\text{LS}} = \underset{\phi \in \mathbb{R}^d}{\operatorname{argmin}} \|S(A\phi - b_\alpha)\|^2 + \alpha \mathbf{1}. \quad (\text{B.19})$$

Theoretical guarantees are given for the case where  $S$  is drawn according to the leverage scores of  $A$ .

## C Equivalence between Lagrangian and Change of Variable Framework

We consider,

$$\phi^R = \underset{\substack{\phi \in \mathbb{R}^d \\ \mathbf{1}^\top \phi = \alpha}}{\operatorname{argmin}} \|C\phi - \mathbf{y}\|^2. \quad (\text{C.1})$$

where  $\alpha = (v([d]) - v(\emptyset))/d$ , and  $C = Z'$  and  $\mathbf{y} = \mathbf{b}$  for solving the constrained least squares exactly, while  $C = SZ'$  and  $\mathbf{y} = S\mathbf{b}$  for approximately methods such that  $E[S^\top S] = I$ . Define  $M = C^\top C$  and  $\mathbf{g} = C^\top \mathbf{y}$ . Next, we write the unconstrained solution of the above least squares as,

$$\phi^u = \underset{\phi \in \mathbb{R}^d}{\operatorname{argmin}} \|C\phi - \mathbf{y}\|^2 = M^+ \mathbf{g} \quad (\text{C.2})$$

**Lagrangian method:** In order to solve (C.1), the Lagrangian method writes,

$$\mathcal{L}(\phi, \lambda) = \frac{1}{2} \phi^\top M \phi - \mathbf{g}^\top \phi + \lambda(\mathbf{1}^\top \phi - \alpha) \quad (\text{C.3})$$

with the following KKT conditions,

1.  $M\phi = \mathbf{g} + \lambda \mathbf{1} = 0 \rightarrow \phi = M^+(\mathbf{g} - \lambda \mathbf{1})$
2.  $\mathbf{1}^\top \phi = \alpha \rightarrow \lambda = \frac{\mathbf{1}^\top M^+ \mathbf{g} - \alpha d}{\mathbf{1}^\top M^+ \mathbf{1}}$

This results in the final solution to be,

$$\phi^R = \phi^u - M^+ \mathbf{1} \frac{\mathbf{1}^\top \phi^u - \alpha d}{\mathbf{1}^\top M^+ \mathbf{1}} \quad (\text{C.4})$$

**Change of Variable Method:** As discussed in Appendix A.3, an alternative method to solve the constrained least squares is using the change of variable to explicitly enforce the constraint. Specifically, we re-parameterize  $\phi$  as,

$$\phi = \alpha \mathbf{1} + Q\mathbf{x} \quad (\text{C.5})$$

where  $Q \in \mathbb{R}^{d \times (d-1)}$  is a matrix with columns forming an orthonormal basis for the null space of  $\mathbf{1}^\top$ , i.e.,  $\mathbf{1}^\top Q = 0$  and  $Q^\top Q = I$ .

Plugging  $\phi$  into the objective results in,

$$\underset{\mathbf{x}}{\operatorname{argmin}} \|C(\alpha \mathbf{1} + Q\mathbf{x}) - \mathbf{y}\|^2 = \underset{\mathbf{x}}{\operatorname{argmin}} \|CQ\mathbf{x} - (\mathbf{y} - \alpha C\mathbf{1})\|^2 \quad (\text{C.6})$$

Solving this results in,

$$\mathbf{x}^* = (Q^\top M^\top Q)^+ Q^\top M(\phi^u - \alpha \mathbf{1}) \quad (\text{C.7})$$

This the final solution is,

$$\phi^R = \mathbf{u} + Q(QM^\top Q)^+ Q^\top M(\phi^u - \alpha \mathbf{1}) \quad (\text{C.8})$$

<sup>8</sup>Since  $\mathbf{1}$  is in the null-space of  $A$ , all of  $\{\phi + c\mathbf{1} : c \in \mathbb{R}\}$  produce the same objective value (and hence the argmin is an infinite set), it should be understood as the minimum norm solution; i.e. for which  $\phi + c\mathbf{1}$  is orthogonal to  $\mathbf{1}$ .

**Equivalence of the methods:** The second term in (C.8) can be seen as a projection of the vector  $\phi^u - \alpha \mathbf{1}$  into the span of  $\mathbf{Q}$  (or alternatively on the null space of  $\mathbf{1}^\top$ ) with the projection matrix,

$$\mathbf{P} = \mathbf{Q}(\mathbf{Q}\mathbf{M}^\top\mathbf{Q})^+\mathbf{Q}^\top\mathbf{M} \quad (\text{C.9})$$

Next, we can rewrite (C.8) as,

$$\phi^R = \alpha \mathbf{1} + \mathbf{P}(\phi^u - \alpha \mathbf{1}) = \phi^u - (\mathbf{I} - \mathbf{P})(\phi^u - \alpha \mathbf{1}) \quad (\text{C.10})$$

From the geometric intuition,  $\mathbf{I} - \mathbf{P}$  can be seen as a metric-projection in the  $\mathbf{M}$ -norm<sup>9</sup> into the orthogonal complement  $\mathbf{Q}$ , or alternatively in the span of  $\mathbf{M}^+\mathbf{1}$ . Such a projection in the  $\mathbf{M}$ -norm for any vector  $\mathbf{z}$  is

$$(\mathbf{I} - \mathbf{P})(\mathbf{z}) = \mathbf{M}^+\mathbf{1} \frac{\mathbf{1}^\top \mathbf{z}}{\mathbf{1}^\top \mathbf{M}^+\mathbf{1}}. \quad (\text{C.11})$$

Thus, plugging in this (C.11) results in

$$\phi^R = \phi^u - \mathbf{M}^+\mathbf{1} \frac{\mathbf{1}^\top(\phi^u - \alpha \mathbf{1})}{\mathbf{1}^\top \mathbf{M}^+\mathbf{1}}, \quad (\text{C.12})$$

thus recovering (C.4) by noting that  $\mathbf{1}^\top \mathbf{1} = d$ .

## D Ratio of mean squared errors

In Appendix A.2, we saw that  $\gamma(\mathbf{z})$  and  $\eta$  (see (2.3)) give *upper* bounds on the sample complexity of matrix-vector multiplication and regression estimators for sampling with replacement. In this section, we study the ratio of mean squared errors for different sampling strategies these estimators in the finite-sample/asymptotic regime. We find that this ratio is determined by  $\gamma$  for both these estimators, as summarized below.

**Theorem D.1** (Ratio of mean squared errors). *Given an  $r \times q$  matrix  $\mathbf{U}$  with orthonormal columns, and an  $r$ -dimensional vector  $\mathbf{b}$ , suppose that we want to estimate  $\mathbf{U}^\top \mathbf{b}$  using matrix-vector multiplication estimator (see Theorem A.1) and  $\arg\min_{\mathbf{y}} \|\mathbf{U}\mathbf{y} - \mathbf{b}\|^2$  using a regression estimator (see Theorem A.5). Given a sampling distribution  $\mathcal{P}$  over  $[r]$  and a fixed number of samples  $m$ , denote  $\mathbf{X}_m^M(\mathcal{P})$ ,  $\mathbf{X}_m^R(\mathcal{P})$  to be the matrix-vector multiplication estimator and regression estimator for  $\mathbf{U}^\top \mathbf{b}$ , respectively.*

*Given two sampling distributions  $\mathcal{P}_1$  and  $\mathcal{P}_2$ , denote  $\gamma_1$  and  $\gamma_2$  to be the values of  $\gamma$  as defined in (2.3) with respect to distributions  $\mathcal{P}_1$  and  $\mathcal{P}_2$ , respectively. Fix the number of samples  $m \in \mathbb{N}$ . Then, we have the following results.*

### 1. (Matrix-Vector Multiplication)

$$\frac{\mathbb{E}[\|\mathbf{X}_m^M(\mathcal{P}_1) - \mathbf{U}^\top \mathbf{b}\|^2]}{\mathbb{E}[\|\mathbf{X}_m^M(\mathcal{P}_2) - \mathbf{U}^\top \mathbf{b}\|^2]} = \frac{\gamma_1(\mathbf{b}) - \|\mathbf{U}^\top \mathbf{b}\|^2}{\gamma_2(\mathbf{b}) - \|\mathbf{U}^\top \mathbf{b}\|^2}. \quad (\text{D.1})$$

### 2. (Regression) If for $i = 1, 2$ , $\mathbb{E}[\|\mathbf{X}_m^R(\mathcal{P}_i) - \mathbf{U}^\top \mathbf{b}\|^2] \neq 0$ and

$$\frac{\sqrt{\mathbb{E}[\|\mathbf{X}_m^R(\mathcal{P}_i) - \mathbf{U}^\top \mathbf{b}\|^4]}}{\mathbb{E}[\|\mathbf{X}_m^R(\mathcal{P}_i) - \mathbf{U}^\top \mathbf{b}\|^2]} = O(1), \quad (\text{D.2})$$

we have

$$\frac{\mathbb{E}[\|\mathbf{X}_m^R(\mathcal{P}_1) - \mathbf{U}^\top \mathbf{b}\|^2]}{\mathbb{E}[\|\mathbf{X}_m^R(\mathcal{P}_2) - \mathbf{U}^\top \mathbf{b}\|^2]} = \left(1 \pm O\left(\frac{1}{\sqrt{m}}\right)\right) \frac{\gamma_1(\mathbf{P}_U \mathbf{b})}{\gamma_2(\mathbf{P}_U \mathbf{b})}, \quad (\text{D.3})$$

where  $x = (a \pm b)$  means  $x \in [a - b, a + b]$ .

*Proof.* Let  $\mathbf{S}$  be an  $m \times r$  sketch matrix (for sampling with replacement) as defined in (A.2) with respect to the distribution  $\mathcal{P}$ . Then, the matrix-vector multiplication estimator is  $\mathbf{X}_m^M(\mathcal{P}) = \mathbf{U}^\top \mathbf{S}^\top \mathbf{S} \mathbf{b}$ , while the regression estimator is  $\mathbf{X}_m^R(\mathcal{P}) = \arg\min_{\mathbf{y}} \|\mathbf{S} \mathbf{U} \mathbf{y} - \mathbf{S} \mathbf{b}\|^2$ .

<sup>9</sup>where  $\mathbf{M}$ -norm is defined as  $\|\mathbf{v}\|_{\mathbf{M}} = \mathbf{v}^\top \mathbf{M} \mathbf{v}$  for all  $\mathbf{v} \in \mathbb{R}^d$

1. **Matrix-Vector Multiplication:** Since  $\mathbb{E}[\|\mathbf{X}_m^M(\mathcal{P}) - \mathbf{U}^\top \mathbf{b}\|^2]$  is the variance of  $\mathbf{X}_m^M$  using  $m$  samples, from (A.4), we have

$$\mathbb{E}[\|\mathbf{X}_m^M(\mathcal{P}_i) - \mathbf{U}^\top \mathbf{b}\|^2] = \frac{1}{m}(\gamma_i(\mathbf{b}) - \|\mathbf{U}^\top \mathbf{b}\|^2) \quad (\text{D.4})$$

for  $i = 1, 2$ , from which we obtain (D.1).

2. **Regression:** Observe that  $\arg\min_{\mathbf{y}} \|\mathbf{U}\mathbf{y} - \mathbf{b}\|^2 = \mathbf{U}^\top \mathbf{b}$ . Furthermore, since

$$\|\mathbf{X}_m^R(\mathcal{P}_i) - \mathbf{U}^\top \mathbf{b}\| = \|\mathbf{U}^\top \mathbf{S}^\top \mathbf{S} \mathbf{U}(\mathbf{X}_m^R(\mathcal{P}_i) - \mathbf{U}^\top \mathbf{b}) + (\mathbf{I} - \mathbf{U}^\top \mathbf{S}^\top \mathbf{S} \mathbf{U})(\mathbf{X}_m^R(\mathcal{P}_i) - \mathbf{U}^\top \mathbf{b})\|, \quad (\text{D.5})$$

we have from triangle and reverse-triangle inequalities,

$$\|\mathbf{X}_m^R(\mathcal{P}_i) - \mathbf{U}^\top \mathbf{b}\| - \|\mathbf{U}^\top \mathbf{S}^\top \mathbf{S} \mathbf{U}(\mathbf{X}_m^R(\mathcal{P}_i) - \mathbf{U}^\top \mathbf{b})\| \leq \|(\mathbf{I} - \mathbf{U}^\top \mathbf{S}^\top \mathbf{S} \mathbf{U})(\mathbf{X}_m^R(\mathcal{P}_i) - \mathbf{U}^\top \mathbf{b})\|. \quad (\text{D.6})$$

For simplicity, denote  $A_i = \|\mathbf{X}_m^R(\mathcal{P}_i) - \mathbf{U}^\top \mathbf{b}\|$ ,  $B_i = \|\mathbf{U}^\top \mathbf{S}^\top \mathbf{S} \mathbf{U}(\mathbf{X}_m^R(\mathcal{P}_i) - \mathbf{U}^\top \mathbf{b})\|$ , and  $C_i = \|(\mathbf{I} - \mathbf{U}^\top \mathbf{S}^\top \mathbf{S} \mathbf{U})(\mathbf{X}_m^R(\mathcal{P}_i) - \mathbf{U}^\top \mathbf{b})\|$ . Then, we have  $|A_i^2 - B_i^2| \leq (A_i + B_i)C_i$ , from which it follows that

$$|\mathbb{E}[A_i^2] - \mathbb{E}[B_i^2]| \leq \mathbb{E}[(A_i + B_i)C_i]. \quad (\text{D.7})$$

Now, observe that  $B_i \leq \|\mathbf{U}^\top \mathbf{S}^\top \mathbf{S} \mathbf{U}\| A_i$  and  $C_i \leq \|\mathbf{I} - \mathbf{U}^\top \mathbf{S}^\top \mathbf{S} \mathbf{U}\| A_i$ . Moreover, we have  $\|\mathbf{U}^\top \mathbf{S}^\top \mathbf{S} \mathbf{U}\| \leq \eta_i$ , where  $\eta_i$  is defined in (2.3) (and depends on the distribution  $\mathcal{P}_i$ ). Therefore,

$$|\mathbb{E}[A_i^2] - \mathbb{E}[B_i^2]| \leq (1 + \eta_i) \mathbb{E}[\|\mathbf{I} - \mathbf{U}^\top \mathbf{S}^\top \mathbf{S} \mathbf{U}\| A_i^2] \leq (1 + \eta_i) \sqrt{\mathbb{E}[\|\mathbf{I} - \mathbf{U}^\top \mathbf{S}^\top \mathbf{S} \mathbf{U}\|^2]} \sqrt{\mathbb{E}[A_i^4]}, \quad (\text{D.8})$$

where we used Cauchy-Schwarz inequality in the last step. Now, note that  $\sqrt{\mathbb{E}[A_i^4]} \geq \mathbb{E}[A_i^2]$  by Jensen's inequality, and thus,  $\sqrt{\mathbb{E}[A_i^4]}/\mathbb{E}[A_i^2] = O(1)$  implies  $\sqrt{\mathbb{E}[A_i^4]}/\mathbb{E}[A_i^2] = \Theta(1)$ . It follows from (A.9) and (A.15) that

$$\left| \frac{\mathbb{E}[B_i^2]}{\mathbb{E}[A_i^2]} - 1 \right| \leq (1 + \eta_i) \sqrt{\frac{\eta_i}{m}} \frac{\sqrt{\mathbb{E}[A_i^4]}}{\mathbb{E}[A_i^2]} = \Theta\left(\frac{1}{\sqrt{m}}\right). \quad (\text{D.9})$$

Thus, for large enough  $m$  (using  $(1 - x)^{-1} = 1 + O(x)$  for  $x \ll 1$ ), we have

$$\frac{\mathbb{E}[A_1^2]}{\mathbb{E}[B_1^2]} = 1 \pm O\left(\frac{1}{\sqrt{m}}\right) \quad (\text{D.10})$$

and

$$\frac{\mathbb{E}[B_2^2]}{\mathbb{E}[A_2^2]} = 1 \pm O\left(\frac{1}{\sqrt{m}}\right), \quad (\text{D.11})$$

which implies

$$\frac{\mathbb{E}[A_1^2]}{\mathbb{E}[A_2^2]} = \left(1 \pm O\left(\frac{1}{\sqrt{m}}\right)\right) \frac{\mathbb{E}[B_1^2]}{\mathbb{E}[B_2^2]}. \quad (\text{D.12})$$

Then, denoting  $\mathbf{y}^* = \arg\min_{\mathbf{y}} \|\mathbf{U}\mathbf{y} - \mathbf{b}\|^2$ , from (A.24) and (A.4), we obtain

$$\frac{\mathbb{E}[B_1^2]}{\mathbb{E}[B_2^2]} = \frac{\mathbb{E}[\|\mathbf{U}^\top \mathbf{S}^\top \mathbf{S}(\mathbf{U}\mathbf{y}^* - \mathbf{b})\|^2]}{\mathbb{E}[\|\mathbf{U}^\top \mathbf{S}^\top \mathbf{S}(\mathbf{U}\mathbf{y}^* - \mathbf{b})\|^2]} \quad (\text{D.13})$$

$$= \frac{\gamma_1(\mathbf{U}\mathbf{y}^* - \mathbf{b}) - \|\mathbf{U}^\top(\mathbf{U}\mathbf{y}^* - \mathbf{b})\|^2}{\gamma_2(\mathbf{U}\mathbf{y}^* - \mathbf{b}) - \|\mathbf{U}^\top(\mathbf{U}\mathbf{y}^* - \mathbf{b})\|^2} \quad (\text{D.14})$$

$$= \frac{\gamma_1(\mathbf{P}_U \mathbf{b})}{\gamma_2(\mathbf{P}_U \mathbf{b})}, \quad (\text{D.15})$$

where in the last step, we use the fact that  $\mathbf{U}\mathbf{y}^* - \mathbf{b} = \mathbf{P}_U \mathbf{b}$  and  $\mathbf{U}^\top \mathbf{P}_U \mathbf{b} = 0$ .  $\square$

Informally, (D.2) says that (the square-root of) the fourth "central moment" is comparable to the mean squared error of the estimator. This requirement actually holds for the simple statistical task of



estimating the mean of a scalar random variable. Indeed, if  $X_1, \dots, X_m$  are iid copies of a random variable  $X$  with  $\mathbb{E}[X^4] < \infty$ , then  $\hat{X} = \sum_{i=1}^m X_i/m$  is an unbiased estimator of  $\mathbb{E}[X]$  satisfying

$$\frac{\sqrt{\mathbb{E}[(\hat{X} - \mathbb{E}[X])^4]}}{\mathbb{E}[(\hat{X} - \mathbb{E}[X])^2]} = \Theta(1) \quad (\text{D.16})$$

for all  $m$ . Motivated by this observation, we expect (D.2) to hold in practice, though this may be difficult to verify rigorously. Also note that while (D.3) gives an expression for ratio of mean squared errors for the regression estimator in the finite-sample regime, the number of samples needs to be large enough so that we can ignore the correction term.

Now, we specialize Theorem D.1 to Shapley value estimation.

**Corollary D.2.** *Let  $\phi^*$  denote the true Shapley value vector and  $\alpha$  as in Theorem 2.1. Given  $\lambda \in \mathbb{R}$ , define  $\mathbf{b}_\lambda$  as in Theorem 2.2. For  $i = 1, 2$ , given  $m \in \mathbb{N}$  samples from the sampling distribution  $\mathcal{P}_i$ , denote  $\phi_\lambda^M(\mathcal{P}_i)$  and  $\phi_\lambda^R(\mathcal{P}_i)$  to be the matrix-vector multiplication estimator and regression estimator, respectively. Then, for all  $\lambda \in \mathbb{R}$ , we have the following results.*

1. **(Matrix-Vector Multiplication)**

$$\frac{\mathbb{E}[\|\phi_\lambda^M(\mathcal{P}_1) - \phi^*\|^2]}{\mathbb{E}[\|\phi_\lambda^M(\mathcal{P}_2) - \phi^*\|^2]} = \frac{\gamma_1(\mathbf{b}_\lambda) - \|\phi^* - \alpha \mathbf{1}\|^2}{\gamma_2(\mathbf{b}_\lambda) - \|\phi^* - \alpha \mathbf{1}\|^2}. \quad (\text{D.17})$$

2. **(Regression)** If for  $i = 1, 2$ ,  $\mathbb{E}[\|\phi_\lambda^R(\mathcal{P}_i) - \phi^*\|^2] \neq 0$  and

$$\frac{\sqrt{\mathbb{E}[\|\phi_\lambda^R(\mathcal{P}_i) - \phi^*\|^4]}}{\mathbb{E}[\|\phi_\lambda^R(\mathcal{P}_i) - \phi^*\|^2]} = O(1), \quad (\text{D.18})$$

we have

$$\frac{\mathbb{E}[\|\phi_\lambda^R(\mathcal{P}_1) - \phi^*\|^2]}{\mathbb{E}[\|\phi_\lambda^R(\mathcal{P}_2) - \phi^*\|^2]} = \left(1 \pm O\left(\frac{1}{\sqrt{m}}\right)\right) \frac{\gamma_1(\mathbf{P}_U \mathbf{b}_\lambda)}{\gamma_2(\mathbf{P}_U \mathbf{b}_\lambda)}. \quad (\text{D.19})$$

*Proof.* Denote  $\mathbf{S}$  to be  $m \times 2^d - 2$  sketching matrix obtained by sampling with replacement according to appropriate sampling probability. Let  $\mathbf{U}$  and  $\mathbf{Q}$  be defined as in Theorem 2.1.

1. From (A.47), we know that  $\|\phi_\lambda^M - \phi^*\| = \|\mathbf{U}^\top \mathbf{S}^\top \mathbf{S} \mathbf{b}_\lambda - \mathbf{U}^\top \mathbf{b}_\lambda\|$ . Furthermore, from Theorem 2.1, we have  $\|\mathbf{U}^\top \mathbf{b}_\lambda\| = \|\mathbf{Q} \mathbf{U}^\top \mathbf{b}_\lambda\| = \|\phi^* - \alpha \mathbf{1}\|$ . Then, the result follows from Theorem D.1.

2. From (A.44), we have  $\|\phi_\lambda^R - \phi^*\| = \|(\mathbf{S} \mathbf{U})^\top \mathbf{S} \mathbf{b}_\lambda - \mathbf{U}^\top \mathbf{b}_\lambda\| = \min_{\mathbf{y}} \|\mathbf{S} \mathbf{U} \mathbf{y} - \mathbf{S} \mathbf{b}_\lambda\|$ . Then, the result follows from Theorem D.1.  $\square$

The results of this section shows that while the theoretical guarantees derived in Theorem 2.2 only give upper bounds on the sample complexity, the quantity  $\gamma$  appearing in this theorem in fact determines the finite-sample/asymptotic behavior of the mean squared errors, as shown in Corollary D.2. Therefore, as long as our metric of performance is the mean squared error, we can directly compare the performance of different sampling schemes by comparing the corresponding values of  $\gamma$ .

## E Adversarial example

In this section, we develop an adversarial example that help us separate the performance (in terms of the mean squared error) of  $\ell_2$ -squared sampling, kernel weight sampling, and modified  $\ell_2$  sampling. The main intuition for construction such adversarial examples comes from Corollary A.9 and Corollary D.2, where we compare the value of  $\gamma(z)$  (see (2.3)) for different sampling strategies. The vector  $\mathbf{z}$  is either equal to  $\mathbf{b}_\lambda$  or  $(\mathbf{I} - \mathbf{U} \mathbf{U}^\top) \mathbf{b}_\lambda$  as in Theorem 2.2. For ease of comparison, in our adversarial example, we will construct a model for which  $\mathbf{b}_\lambda = (\mathbf{I} - \mathbf{U} \mathbf{U}^\top) \mathbf{b}_\lambda$ , and the lower bounds in Corollary A.9 are saturated up to constant factors. For simplicity, we fix  $\lambda = (v([d]) - v(\emptyset))/d = \alpha$ , as done in previous studies [LL17; MW25].

We now construct an example for which we can provably show better theoretical guarantees for modified  $\ell_2$  sampling and kernel weight sampling compared to  $\ell_2$ -squared sampling. To that end,

define the function  $f: \mathbb{R}^d \rightarrow \mathbb{R}$ , which is our model acting on  $d$ -dimensional input data, as  $f(x) = g(\sum_{i=1}^d h(x_i))$ , where  $g$  and  $h$  are real-valued functions to be chosen below. While there is a reasonable freedom in defining the functions  $h$  and  $g$ , we choose these judiciously in order to theoretically compute the Shapley values. Given a parameter  $\epsilon_0 \in (0, 1)$ , we define

$$h(x) = \begin{cases} 1 & \text{if } x > \epsilon_0 \\ 0 & \text{otherwise.} \end{cases} \quad (\text{E.1})$$

Furthermore, given parameters  $n \in \mathbb{N}$  (independent of  $d$ ) and  $\xi, \chi \in \mathbb{R}$ , we define  $g: \mathbb{R} \rightarrow \mathbb{R}$  as

$$g(x) = \begin{cases} \xi \left(\frac{x}{d}\right)^2 + \chi x & \text{if } 1 \leq x \leq n \text{ or } d-n \leq x \leq d-1 \\ \chi x & \text{otherwise.} \end{cases} \quad (\text{E.2})$$

Then, we have the following result.

**Proposition E.1.** *For the model  $f(\mathbf{x}) = g(\sum_{i=1}^d h(x_i))$ , where  $h$  is given in (E.1) and  $g$  is given in (E.2), baseline  $\mathbf{y} = \mathbf{0}$ , and explicand  $\mathbf{x} = \mathbf{1}$ , we have  $\phi^* = \chi \mathbf{1}$  and*

$$\begin{aligned} \gamma_{\ell_2^2}((\mathbf{I} - \mathbf{U}\mathbf{U}^\top)\mathbf{b}_\lambda) &= \gamma_{\ell_2^2}(\mathbf{b}_\lambda) = \Theta(d) \\ \gamma_{\ker}((\mathbf{I} - \mathbf{U}\mathbf{U}^\top)\mathbf{b}_\lambda) &= \gamma_{\ker}(\mathbf{b}_\lambda) = \Theta(\log(d)) \\ \gamma_{\text{m-}\ell_2}((\mathbf{I} - \mathbf{U}\mathbf{U}^\top)\mathbf{b}_\lambda) &= \gamma_{\text{m-}\ell_2}(\mathbf{b}_\lambda) = \Theta(\sqrt{d}). \end{aligned} \quad (\text{E.3})$$

*Proof.* First, we compute  $\mathbf{b}_\lambda$  and show that  $(\mathbf{I} - \mathbf{U}\mathbf{U}^\top)\mathbf{b}_\lambda = \mathbf{b}_\lambda$ . For a given subset  $S$  of  $[d]$ , define  $\mathbf{x}^S \in \mathbb{R}^d$  as  $x_i^S = x_i$  if  $i \in S$  and  $x_i^S = y_i$  if  $y \notin S$ . Then, from the definition of  $f$ , it follows that for all  $S \subseteq [d]$ , we have  $v(S) = f(\mathbf{x}^S) = g(|S|)$ . By construction, we have  $v([d]) = \chi d$  and  $v(\emptyset) = 0$ . Since  $v(S)$  depends only on the size of the subset  $S$ , by (1.1), we have that  $\phi^* = \phi_0 \mathbf{1}$  for some constant  $\phi_0^* \in \mathbb{R}$ . Then, the constraint  $\mathbf{1}^\top \phi^* = v([d]) - v(\emptyset)$  gives  $\phi_0^* = (v[d] - v(\emptyset))/d = \chi$ . Thus, for this example, we have  $\lambda = \alpha = \chi$ . Since  $\phi^* = \chi \mathbf{1} = \alpha \mathbf{1}$ , from Theorem 2.1, we have  $\mathbf{Q}\mathbf{U}^\top \mathbf{b}_\lambda = \mathbf{0}$ , and therefore,  $\mathbf{U}\mathbf{U}^\top \mathbf{b}_\lambda = (\mathbf{U}\mathbf{Q}^\top)(\mathbf{Q}\mathbf{U}^\top)\mathbf{b}_\lambda = \mathbf{0}$ . It follows that  $(\mathbf{I} - \mathbf{U}\mathbf{U}^\top)\mathbf{b}_\lambda = \mathbf{b}_\lambda$ .

Next, we compute  $\|\mathbf{b}_\lambda\|^2$ ,  $\|\mathbf{H}\mathbf{b}_\lambda\|^2$ , and  $\|\sqrt{\mathbf{H}}\mathbf{b}_\lambda\|^2$  (see Corollary A.10). Since  $v$  depends only on the size of the subset and  $\lambda = \chi$ , we obtain

$$\|\mathbf{b}_\lambda\|^2 = \frac{d}{d-1} \sum_{h=1}^{d-1} \frac{d-1}{h(d-h)} (g(h) - \lambda h)^2 = \frac{\xi^2}{d^3} \left( \sum_{h=1}^n \frac{h^3}{d-h} + \sum_{h=d-n}^{d-1} \frac{h^3}{d-h} \right) = \Theta(1) \quad (\text{E.4})$$

since  $n$  is a constant independent of  $d$ . Similarly, we have

$$\|\mathbf{H}\mathbf{b}_\lambda\|^2 = \frac{d}{d-1} \sum_{h=1}^{d-1} \frac{d-1}{h(d-h)} \frac{h(d-h)}{d^2} (g(h) - \lambda h)^2 = \frac{\xi^2}{d^5} \left( \sum_{h=1}^n h^4 + \sum_{h=d-n}^{d-1} h^4 \right) = \Theta\left(\frac{1}{d}\right). \quad (\text{E.5})$$

We also have

$$\begin{aligned} \|\sqrt{\mathbf{H}}\mathbf{b}_\lambda\|^2 &= \frac{d}{d-1} \sum_{h=1}^{d-1} \frac{d-1}{h(d-h)} \frac{\sqrt{h(d-h)}}{d} (g(h) - \lambda h)^2 \\ &= \frac{\xi^2}{d^4} \left( \sum_{h=1}^n \frac{h^{3.5}}{\sqrt{d-h}} + \sum_{h=d-n}^{d-1} \frac{h^{3.5}}{\sqrt{d-h}} \right) = \Theta\left(\frac{1}{\sqrt{d}}\right). \end{aligned} \quad (\text{E.6})$$

Therefore, by Corollary A.10, we have

$$\begin{aligned} \gamma_{\ell_2^2}(\mathbf{b}_\lambda) &= \Theta(d\|\mathbf{b}_\lambda\|^2) = \Theta(d), \\ \gamma_{\ker}(\mathbf{b}_\lambda) &= \Theta(d \log(d) \|\mathbf{H}\mathbf{b}_\lambda\|^2) = \Theta(\log(d)), \\ \gamma_{\text{m-}\ell_2}(\mathbf{b}_\lambda) &= \Theta(d\|\sqrt{\mathbf{H}}\mathbf{b}_\lambda\|^2) = \Theta(\sqrt{d}). \end{aligned} \quad (\text{E.7})$$

□

We remark that the adversarial model constructed in this section is a specific toy example meant to illustrate the advantage of modified  $\ell_2$  and kernel sampling. One can construct many such adversarial examples for which modified  $\ell_2$  and kernel gives better performance than both leverage scores. We can now translate these results into statements concerning the mean squared error for the different sampling schemes.

**Corollary E.2.** *Denote  $\mathcal{P}_{\ell_2^2}$ ,  $\mathcal{P}_{\text{ker}}$ , and  $\mathcal{P}_{\text{m-}\ell_2}$  to be the sampling distributions for  $\ell_2^2$ -squared, kernel, and modified  $\ell_2$  weights, respectively. Then, for the model  $f(\mathbf{x}) = g(\sum_{i=1}^d h(x_i))$ , where  $h$  is given in (E.1) and  $g$  is given in (E.2), baseline  $\mathbf{y} = \mathbf{0}$ , and explicand  $\mathbf{x} = \mathbf{1}$ , we have (using  $m$  samples, drawn with replacement)*

$$\begin{aligned}
\frac{\mathbb{E}[\|\phi_\lambda^{\text{M}}(\mathcal{P}_{\ell_2^2}) - \phi^*\|^2]}{\mathbb{E}[\|\phi_\lambda^{\text{M}}(\mathcal{P}_{\text{ker}}) - \phi^*\|^2]} &= \frac{\gamma_{\ell_2^2}(\mathbf{b}_\lambda)}{\gamma_{\text{ker}}(\mathbf{b}_\lambda)} = \Theta\left(\frac{d}{\log(d)}\right), \\
\frac{\mathbb{E}[\|\phi_\lambda^{\text{M}}(\mathcal{P}_{\text{m-}\ell_2}) - \phi^*\|^2]}{\mathbb{E}[\|\phi_\lambda^{\text{M}}(\mathcal{P}_{\text{ker}}) - \phi^*\|^2]} &= \frac{\gamma_{\text{m-}\ell_2}(\mathbf{b}_\lambda)}{\gamma_{\text{ker}}(\mathbf{b}_\lambda)} = \Theta\left(\frac{\sqrt{d}}{\log(d)}\right), \\
\frac{\mathbb{E}[\|\phi_\lambda^{\text{M}}(\mathcal{P}_{\ell_2^2}) - \phi^*\|^2]}{\mathbb{E}[\|\phi_\lambda^{\text{M}}(\mathcal{P}_{\text{m-}\ell_2}) - \phi^*\|^2]} &= \frac{\gamma_{\text{m-}\ell_2}(\mathbf{b}_\lambda)}{\gamma_{\text{ker}}(\mathbf{b}_\lambda)} = \Theta(\sqrt{d}), \\
\frac{\mathbb{E}[\|\phi_\lambda^{\text{R}}(\mathcal{P}_{\ell_2^2}) - \phi^*\|^2]}{\mathbb{E}[\|\phi_\lambda^{\text{R}}(\mathcal{P}_{\text{ker}}) - \phi^*\|^2]} &\approx \frac{\gamma_{\ell_2^2}(\mathbf{b}_\lambda)}{\gamma_{\text{ker}}(\mathbf{b}_\lambda)} = \Theta\left(\frac{d}{\log(d)}\right) \quad \text{for large enough } m, \\
\frac{\mathbb{E}[\|\phi_\lambda^{\text{R}}(\mathcal{P}_{\text{m-}\ell_2}) - \phi^*\|^2]}{\mathbb{E}[\|\phi_\lambda^{\text{R}}(\mathcal{P}_{\text{ker}}) - \phi^*\|^2]} &\approx \frac{\gamma_{\text{m-}\ell_2}(\mathbf{b}_\lambda)}{\gamma_{\text{ker}}(\mathbf{b}_\lambda)} = \Theta\left(\frac{\sqrt{d}}{\log(d)}\right) \quad \text{for large enough } m, \\
\frac{\mathbb{E}[\|\phi_\lambda^{\text{R}}(\mathcal{P}_{\ell_2^2}) - \phi^*\|^2]}{\mathbb{E}[\|\phi_\lambda^{\text{R}}(\mathcal{P}_{\text{m-}\ell_2}) - \phi^*\|^2]} &\approx \frac{\gamma_{\ell_2^2}(\mathbf{b}_\lambda)}{\gamma_{\text{ker}}(\mathbf{b}_\lambda)} = \Theta(\sqrt{d}) \quad \text{for large enough } m.
\end{aligned} \tag{E.8}$$

The expressions for the ratio of mean squared errors for the regression estimator hold under the technical assumption (D.18) stated in Corollary D.2.

*Proof.* This follows by directly substituting the results of Proposition E.1 in Corollary D.2.  $\square$

This example shows that modified  $\ell_2$  gives an advantage over leverage scores by a factor of  $\sqrt{d}$ . On the other hand, kernel weights give a factor of  $d/\log(d)$  advantage over leverage scores, while a factor of  $\sqrt{d}/\log(d)$  advantage over modified  $\ell_2$ . These saturate the lower bounds in Corollary A.9. Since we have the analytical expressions for  $\gamma$  for the adversarial example studied in this section, in Fig. 4, we plot the ratio of  $\gamma$  for different the sampling distributions using these expressions.

## F Methodology

In this section, we describe our estimators algorithmically. The unified theoretical framework can directly be implemented into an algorithmic framework, which we depict in Fig. 5. The general procedure to generate the Shapley values in our framework requires three choices: (1) a sampling distributions on the index-sizes, (2) a strategy for sampling (with replacement, without replacement) and (3) an approximation method (least squares or matrix-vector). Least squares and matrix-vector estimation are reported in Section 2. The missing detail is *how the sampling procedure is implemented* (this is the middle column in Fig. 5). We report this in Algorithm 1 for with replacement sampling and in Algorithm 2.

### F.1 With Replacement Estimators

Sampling with replacement to generate the sketch is a computationally efficient procedure that performs well in practice. However, if the number of samples  $m > 2^d$ , the estimator will fail to compute exact Shapley values in general. We report the sampling procedure as implemented in our experimental evaluations in Algorithm 1.

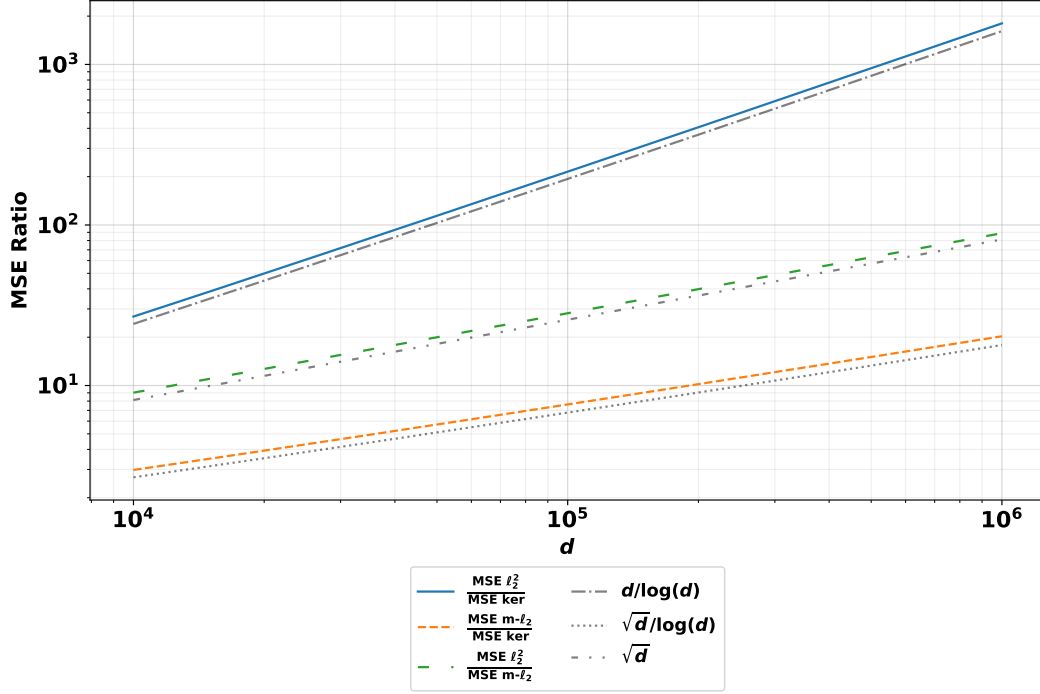

**Figure 4:** Ratio of mean-squared errors (MSE) as a function of the dimension for different sampling strategies for the adversarial model in [Appendix E](#) (computed analytically from expressions for  $\gamma$ ). The matrix-vector multiplication estimator and regression estimator have (almost) the same MSE ratio for this model (see [Corollary E.2](#)). For  $\ell_2$ -squared v/s kernel (solid) and modified  $\ell_2$  v/s kernel (dashed), kernel weights give an advantage by a factor of  $\tilde{O}(d)$  and  $\tilde{O}(\sqrt{d})$  respectively. On the other hand, for modified  $\ell_2$  v/s  $\ell_2$ -squared (long dashed), modified  $\ell_2$  outperforms  $\ell_2$ -squared by a factor of  $O(\sqrt{d})$ .

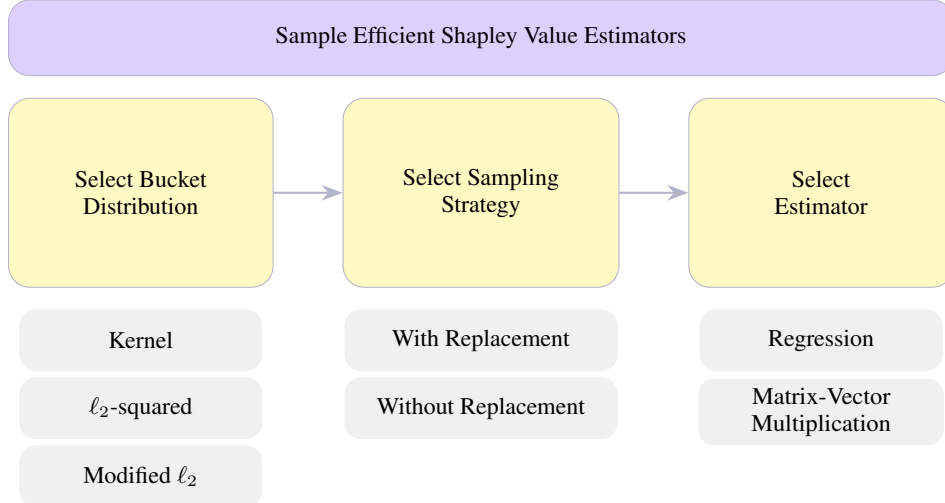

**Figure 5:** The unified framework for estimating Shapley values with the proposed class of estimators. First, we define a distribution to apply to each *bucket* (i.e., to the selection of the bit vector to select  $p_i$  is the probability of sampling an item from bucket/coalition of size (or bit vector with Hamming weight)  $i \in [d]$ ). Then we select a sampling strategy (with or without replacement). Finally, we select the estimation strategy. If we limit ourselves to  $\ell_2$ -squared and modified, and kernel distribution, this provides a total of  $3 \times 2 \times 2 = 12$  estimators.

---

**Algorithm 1** Sampling with Replacement (paired sampling)

---

**Require:**  $d$ : number of features  $m$ : number of samples expected by user,  $p$  choice of distribution on  $d - 1$  buckets, `maxval` maximum value before Poisson approximation is applied (our algorithm uses  $10^{10}$ ).

**Ensure:**  $SZ \in \mathbb{R}^{m \times d}$ ,  $\tilde{W} \in \mathbb{R}^{m \times m}$ : sub-sampled  $Z$  matrix and weights

- 1: Redefine  $p_i \leftarrow 2p_i$  for  $i = 1, \dots, \lfloor \frac{d-1}{2} \rfloor$ .
- 2: First sample with replacement  $\lfloor \frac{m}{2} \rfloor$  from indices  $i = 1, \dots, \lceil \frac{d-1}{2} \rceil$ ,  $j \in [m]$  each with probability  $p_1, \dots, p_{\lceil \frac{d-1}{2} \rceil}$ . Denote  $m_i$  to be the number of times we observe the index (bucket)  $i$  during sampling.
- 3: For each  $i = 1, \dots, \lceil \frac{d-1}{2} \rceil$ , construct  $\mathbf{b}_j \in \{0, 1\}^d$  by sampling with replacement  $m_i$  bitstrings of size  $i$ , which is equivalent to sampling without replacement  $i$  indices from  $[d]$ , uniformly; and generate, the complement  $\bar{\mathbf{b}}_{i,j} = 1 - \mathbf{b}_{i,j}$ .
- 4: Construct  $\mathbf{w}_j = ((d-1)p_j)^{-1}$  and return:

$$SZ = \text{stack}([\mathbf{b}_j, \bar{\mathbf{b}}_j]_{j \in \tilde{m}}), \tilde{W} = \frac{1}{m} \text{diag}([\mathbf{w}_j, \mathbf{w}_j]_{j \in \tilde{m}}).$$

---

## F.2 Without Replacement Estimators

At first glance, sampling based on the without replacement sampling scheme described in [Section 2.3](#) (see also [Appendix A.5](#)) requires flipping  $2^{[d]} - 2$  coins. However, for the sampling distributions described in [Section 2.2](#), given the size of a subset, the probability of picking any given subset of that size is constant. This observation is used in [\[MW25\]](#) to avoid flipping exponentially many coins. In particular, one can determine which coins are heads by first determining how many heads there will be of a given subset size, and then picking the resulting subsets of this size uniformly at random. We describe a variant of [\[MW25, Algorithm 2\]](#) in [Algorithm 2](#).

## G Experimental Details

We use publicly available datasets for reproducibility; choosing particularly those available through the shap for their popularity, ease of use and for a direct comparison with [\[MW25\]](#).

### G.1 Training Details

In this subsection, we detail the experimental design choices and hyperparameter for low [Section 3.1](#) and [Section 3.2](#), including implementation details, to promote reproducibility.

#### G.1.1 Low Dimensional Experiments

We refer to low dimensional experiments to the content of [Section 3.1](#). For each dataset we train a decision tree from the `xgboost`. Specifically, we use the `XGBRegressor` class with 100 estimators and maximum depth of 10 for each task. We replacing missing values with the mean for that feature in the dataset. Note that the goal is not to achieve competitive performance but to rapidly train a model where the Shapley values can be computed exactly and efficiently. The train test splits are ordered 80/20 splits for all datasets; we pick as query and baseline points the first data points of the test and train datasets respectively.

#### G.1.2 High Dimensional Experiments

We refer to high dimensional experiments to the content of [Section 3.2](#). For the two classification tasks, we train a `RandomForestClassifier` from the `sci-kit learn` library. The random forest has maximum depth 15 and random state 42 for both tasks (MNIST and CIFAR-10). For both datasets, we pick as query and baseline points the first data points of the test and train datasets respectively.

For MNIST we use train test splits (80/20) with random state 42 using the `train_test_split` method on `sci-kit learn`. We achieve a test accuracy of 96.3%.

---

**Algorithm 2** Sampling without Replacement (paired sampling, modified from [MW25])

---

**Require:**  $d$ : number of features  $m$ : number of samples expected by user,  $p$  choice of distribution on  $d$  buckets,  $\text{maxval}$  maximum value before Poisson approximation is applied (our algorithm uses  $10^{10}$ ).

**Ensure:**  $SZ \in \mathbb{R}^{m \times d}$ ,  $\tilde{W} \in \mathbb{R}^{m \times m}$ : sub-sampled  $Z$  matrix and weights

1: Redefine  $p_i \leftarrow 2p_i$  for  $i = 1, \dots, \lfloor \frac{d-1}{2} \rfloor$ .

2: Choose  $\alpha$  such that

$$\lfloor \frac{m}{2} \rfloor = \sum_{i=1}^{\lfloor \frac{d-1}{2} \rfloor} \min\left(\binom{d}{i}, \alpha p_i\right)$$

using binary search algorithm.

3: **if**  $\binom{d}{i} < \text{maxval}$  **then** let

$$m_i \leftarrow \text{Binomial}\left(\binom{d}{i}, \min(1, \alpha p_i)\right)$$

4: **else** let

$$m_i \leftarrow \text{Poisson}(\alpha p_i),$$

and let  $\tilde{m} = \sum_{i=1}^{\lfloor \frac{d-1}{2} \rfloor} m_i$ .

5: **end if**

6: Construct  $j \in [m_i]$  bitstring arrays of  $\mathbf{b}_j \in \{0, 1\}^d$  of size  $i \in [\lfloor \frac{d-1}{2} \rfloor]$  without replacement (e.g. using Fisher Yates shuffling or Algorithms 2,3 in [MW25]). If there is a middle bucket (i.e.,  $d$  is odd), fix  $\mathbf{b}_{\lfloor \frac{d-1}{2} \rfloor, j} = 1$  and sample without replacement from the remaining bitstrings. Then, generate the complement  $\bar{\mathbf{b}}_{i,j} = 1 - \mathbf{b}_{i,j}$ .

7: Construct  $\mathbf{w}_j = \left((d-1) \min(\binom{d}{j}, \alpha p_j)\right)^{-1}$  and return:

$$SZ = \text{stack}([\mathbf{b}_j, \bar{\mathbf{b}}_j]_{j \in \tilde{m}}), \tilde{W} = \text{diag}([\mathbf{w}_j, \mathbf{w}_j]_{j \in \tilde{m}}).$$

---

For the CIFAR-10 dataset, we use standard train test split from the `torchvision` library. We preprocess the input data by normalising. We achieve low accuracy 44.98%, as should be expected using basic tree-based models for CIFAR-10; however, using said models enables the exact computation of Shapley values, which we consider a more important aspect for the paper. We used paired, with replacement estimators with modified  $\ell_2$  and  $\mathbf{b}_\alpha$

## G.2 Datasets

In this subsection, we briefly describe the datasets used for the experiments, for completeness.

### G.2.1 shap Datasets

**Adult.** Demographic information about individuals collected from the 1994 U.S. Census database. It is used to predict whether a person earns more than \$50,000 dollars per year based on individual attributes: age, work, class, education, etc.,.

**California.** The California Housing dataset is a linear regression tasks containing information collected from the 1990 U.S. Census. This includes data on housing prices as targets, and median income, housing age, and average number of rooms as the input features.

**Communities.** Communities and crime dataset studies the relationship between community characteristics and crime rates, including socio-economic, law enforcement and demographic factors - in the United States. This is a regression task.

**Diabetes.** The Diabetes dataset is used to predict onset of diabetes as diagnostic measurements. It includes factors like age, blood pressure, and body mass index.

**Independent and Correlated** Datasets that are used to study the behavior of the algorithm under the assumption of feature independence and correlation respectively. The target is a linear regressor of the features.

**IRIS.** This classic dataset in the field consists of 150 samples of iris flowers, with three different species: Iris setosa, iris versicolor and Iris virginica. Each has four features, describing anatomical sizes of the plant. This is a classification task.

**NHANES** The National Health and Nutrition Examination Survey (NHANES) is a program designed to assess health and nutritional status of citizens of the United States. Based on interview and physical examination data, it predicts survival times based on medical features (regression).

### G.2.2 Image Datasets

**MNIST** The MNIST dataset is a collection of handwritten digits (0-9); the classic task is to classify into their respective value. The dataset has  $28 \times 28 (= 784)$  dimensions. This is an incredibly popular dataset used for training and testing image classification algorithms.

**CIFAR-10** CIFAR-10 dataset is a classification task dataset where a collection of 60,000 images, with  $32 \times 32 \times 3 (= 3072)$  dimensions, are mapped to target class: cars, airplanes, birds, cats, deer, dogs, frogs, horses, ships and trucks. The standard split for this dataset is 10,000 test images and 50,000 training images, which we use in our experiments. This is considered a relatively challenging dataset for boosted trees and feedforward neural networks; good performance is achieved, however, for convolutional neural networks.

## G.3 Adjustments for Classification Tasks

In the computation of Shapley values for classification tasks, a slight adjustment is needed. While the output of the classifier is ultimately a single value  $f(x) \in [c]$ , for  $c \in \mathbb{N}$  classes, computing Shapley on a value function that predicts classes would be incorrect: in general, the classes should not be considered an ordered set. Therefore, we compute Shapley values on the probabilities for each class.

Successively, the mean squared error (normalized) is computed on the vectorized output of the Shapley computation. For example, for a classification task with  $c$  classes and a  $d$ -dimensional input space, the Shapley values will be in  $\hat{\phi} \in \mathbb{R}^{c \times d}$ . Therefore, to compute the mean squared error (normalized), we vectorize the matrices of Shapley values and compute as usual.

In high dimensional experiments, the average is taken across test points. We also provide evaluation details with the purpose of increasing transparency and promoting reproducibility of experiments.

## H Extended Experimental Results

The goal of this section is to report the numerical results from our experiments. We first report the extended experiments from [Section 3.1](#), followed by experiments in [Section 3.2](#). Importantly, we share tables and plots containing our results.

### H.1 Low Dimensional Experiments

In low dimensional experiments, as described in [Appendix G](#) and [Section 3.1](#), we compute the mean squared error (normalized by norm of exact Shapley values) as the median of 100 random seeds (0-99). We also report the average and interquartile ranges for each of the experiments. These results are summarized in [Table 2](#) (median), [Table 3](#) (lower quantile), [Table 4](#) (upper quantile), and [Table 5](#) ( $b_0$  values). In each of those tables we report the values for selected number of samples: for IRIS we report  $m = 10$ ; Adult, California and Diabetes we show results for  $m = 64$ ; for Communities, Correlated, Independent, and NHANES we report  $m = 50000$ .

### H.2 High Dimensional Experiments

For high dimensional experiments, as described in [Appendix G](#) and [Section 3.2](#), we compute the mean squared error (normalized by norm of exact Shapley values) as the average of 10 test points from the respective datasets. We also report quantiles and median in [Table 6](#).



### H.3 Faithfulness Experiments

For each experiment in the high dimensional setting, we compute the insertion and deletion curves as reported in Table 7 (insertion and deletion AUC), Fig. 6 (insertion and deletion curves for MNIST), and Fig. 7 (insertion and deletion curves for CIFAR-10).

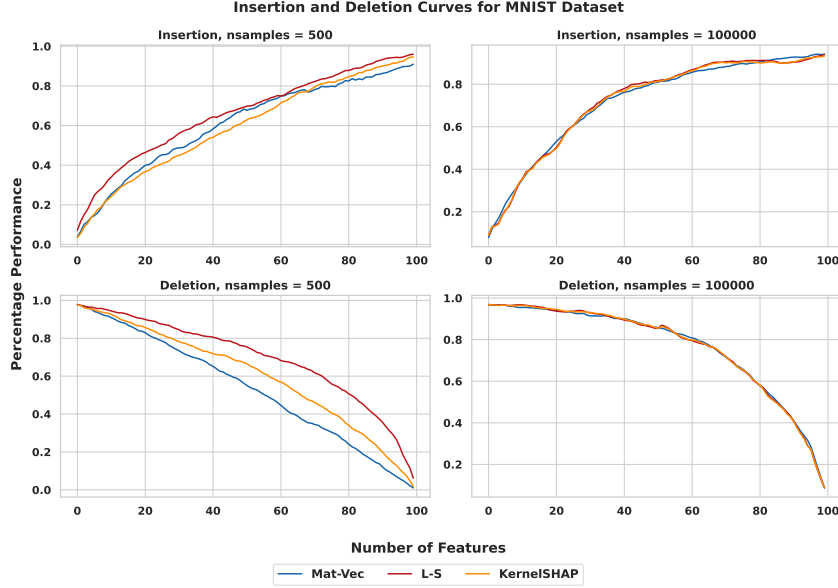

**Figure 6:** Insertion and Deletion Plots for MNIST Dataset, for varying number of Samples. As expected, the three methods converge to towards the same curve as the plots increase.

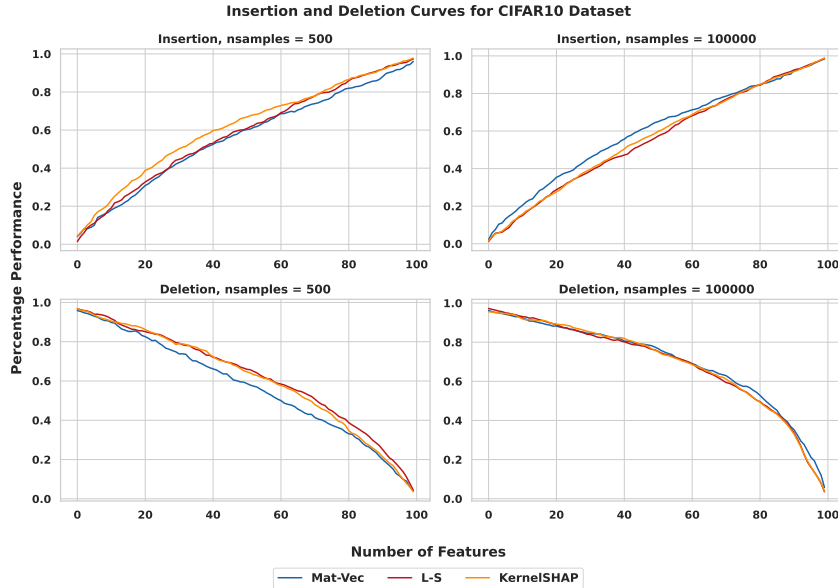

**Figure 7:** Insertion and Deletion Plots for MNIST Dataset, for varying number of Samples. As expected, the three methods converge to towards the same curve as the plots increase.

For any Shapley value, the insertion curve is computed by adding features, in order of importance, to an empty vector and computing the prediction. The expectation is that the most important features (the first features to be added) contribute most to reconstructing the original prediction. Hence, a good feature attribution method will maximise the area under this curve.

Conversely, the deletion curve is computed by removing features (replacing them by 0), in order of importance, to the original test point, and computing the prediction. The expectation is that the most important features (the first features to be removed) will deteriorate the performance rapidly. Hence, a good feature attribution method will minimize the area under the curve.

We compute this curve for each test point and average across the curves (as reported in [Fig. 6](#) and [Fig. 7](#)). We limit the computation to the top 100 features for both datasets and report the values in percentages. Note that for MNIST, this is a complete ordering of all features (64), whereas for CIFAR-10, this is only a fraction of the 3072 dimensions. These are commonly used faithfulness measures from the literature: the higher the insertion AUC / the lower the deletion AUC, the higher the faithfulness of the model.

Moreover, for each test point, we compute the Spearman correlation rank from the `scipy stats` library, on the Shapley values, summed (in absolute value) across classes. We report the results in [Table 7](#). This is a measure of agreement between the true Shapley values and the estimated Shapley values. The higher the Spearman rank correlation, the better the faithfulness of the approximation. Note, however, that due to the presence of many small values (near zero Shapley values) in image classification tasks, this measure may overemphasize incongruence between features.

| Dataset     | Approximation | Sampling                               | With Replacement         | Without Replacement         |
|-------------|---------------|----------------------------------------|--------------------------|-----------------------------|
| Adult       | Kernel        | kernel                                 |                          | 0.0221                      |
|             |               | kernel                                 | 0.577                    | 0.0904                      |
|             | Matrix-Vec    | $\ell_2$ -squared                      | 0.208                    | 0.0793                      |
|             |               | modified $\ell_2$                      | 0.2                      | 0.0888                      |
|             | Least Squares | kernel                                 | 0.00652                  | 0.0016                      |
|             |               | $\ell_2$ -squared<br>modified $\ell_2$ | 0.00509<br>0.00572       | 0.00146<br><b>0.00136</b>   |
| California  | Kernel        | kernel                                 |                          | 0.0165                      |
|             |               | kernel                                 | 1.03                     | 0.151                       |
|             | Matrix-Vec    | $\ell_2$ -squared                      | 0.218                    | 0.148                       |
|             |               | modified $\ell_2$                      | 0.254                    | 0.136                       |
|             | Least Squares | kernel                                 | 0.00419                  | 0.00234                     |
|             |               | $\ell_2$ -squared<br>modified $\ell_2$ | 0.0039<br>0.00427        | 0.00222<br><b>0.00193</b>   |
| Communities | Kernel        | kernel                                 |                          | 0.000810                    |
|             |               | kernel                                 | 0.009871                 | 0.007950                    |
|             | Matrix-Vec    | $\ell_2$ -squared                      | 0.009174                 | 0.026858                    |
|             |               | modified $\ell_2$                      | 0.007645                 | 0.018672                    |
|             | Least Squares | kernel                                 | 0.000887                 | 0.000719                    |
|             |               | $\ell_2$ -squared<br>modified $\ell_2$ | 0.000479<br>0.000554     | <b>0.000301</b><br>0.000315 |
| Correlated  | Kernel        | kernel                                 |                          | 0.000620                    |
|             |               | kernel                                 | 0.007933                 | 0.005208                    |
|             | Matrix-Vec    | $\ell_2$ -squared                      | 0.009155                 | 0.002495                    |
|             |               | modified $\ell_2$                      | 0.006804                 | 0.002772                    |
|             | Least Squares | kernel                                 | 0.000252                 | 0.000169                    |
|             |               | $\ell_2$ -squared<br>modified $\ell_2$ | 0.000146<br>0.000172     | <b>0.000064</b><br>0.000072 |
| Diabetes    | Kernel        | kernel                                 |                          | 0.0163                      |
|             |               | kernel                                 | 1.47                     | 0.218                       |
|             | Matrix-Vec    | $\ell_2$ -squared                      | 0.235                    | 0.179                       |
|             |               | modified $\ell_2$                      | 0.274                    | 0.2                         |
|             | Least Squares | kernel                                 | 0.00183                  | 0.0106                      |
|             |               | $\ell_2$ -squared<br>modified $\ell_2$ | <b>0.00155</b><br>0.0016 | 0.00889<br>0.00983          |
| Independent | Kernel        | kernel                                 |                          | 0.000480                    |
|             |               | kernel                                 | 0.006640                 | 0.004847                    |
|             | Matrix-Vec    | $\ell_2$ -squared                      | 0.005631                 | 0.004184                    |
|             |               | modified $\ell_2$                      | 0.005024                 | 0.003773                    |
|             | Least Squares | kernel                                 | 0.000673                 | 0.000502                    |
|             |               | $\ell_2$ -squared<br>modified $\ell_2$ | 0.000401<br>0.000487     | <b>0.000370</b><br>0.000377 |
| IRIS        | Kernel        | kernel                                 |                          | 0.0222                      |
|             |               | kernel                                 | 0.471                    | 0.218                       |
|             | Matrix-Vec    | $\ell_2$ -squared                      | 0.359                    | 0.229                       |
|             |               | modified $\ell_2$                      | 0.366                    | 0.254                       |
|             | Least Squares | kernel                                 | 3.28e-05                 | 1.64e-05                    |
|             |               | $\ell_2$ -squared<br>modified $\ell_2$ | 3.28e-05<br>3.28e-05     | <b>1.45e-05</b><br>1.54e-05 |
| NHANES      | Kernel        | kernel                                 |                          | 0.000597                    |
|             |               | kernel                                 | 0.011273                 | 0.008429                    |
|             | Matrix-Vec    | $\ell_2$ -squared                      | 0.013369                 | 0.009053                    |
|             |               | $\ell_2$ -modified                     | 0.009980                 | 0.007377                    |
|             | Least Squares | kernel                                 | 0.002637                 | 0.002153                    |
|             |               | $\ell_2$ -squared<br>modified $\ell_2$ | 0.001505<br>0.001674     | 0.00221<br><b>0.000428</b>  |

**Table 2:** Mean Squared Error for Different Sampling and Approximation Methods Across Various Datasets (best relative MSE performance marked in bold).

| Dataset     | Approximation     | Sampling          | With Replacement | Without Replacement |
|-------------|-------------------|-------------------|------------------|---------------------|
| Adult       | Kernel            | kernel            |                  | 0.0128              |
|             |                   | kernel            | 0.322            | 0.0635              |
|             | Matrix-Vec        | $\ell_2$ -squared | 0.124            | 0.0526              |
|             |                   | modified $\ell_2$ | 0.101            | 0.0584              |
|             | Least Squares     | kernel            | 0.00414          | 0.000931            |
|             |                   | $\ell_2$ -squared | 0.00316          | 0.000895            |
| California  | Kernel            | kernel            |                  | 0.0118              |
|             |                   | kernel            | 0.595            | 0.0904              |
|             | Matrix-Vec        | $\ell_2$ -squared | 0.15             | 0.0939              |
|             |                   | modified $\ell_2$ | 0.156            | 0.0905              |
|             | Least Squares     | kernel            | 0.00271          | 0.0017              |
|             |                   | $\ell_2$ -squared | 0.00281          | 0.0015              |
| Communities | Kernel            | kernel            |                  | 0.000735            |
|             |                   | kernel            | 0.009144         | 0.007282            |
|             | Matrix-Vec        | $\ell_2$ -squared | 0.008249         | 0.025044            |
|             |                   | modified $\ell_2$ | 0.006825         | 0.016340            |
|             | Least Squares     | kernel            | 0.000785         | 0.000659            |
|             |                   | $\ell_2$ -squared | 0.000436         | 0.000276            |
| Correlated  | Kernel            | kernel            |                  | 0.000547            |
|             |                   | kernel            | 0.006926         | 0.004395            |
|             | Matrix-Vec        | $\ell_2$ -squared | 0.008373         | 0.002188            |
|             |                   | modified $\ell_2$ | 0.006078         | 0.002340            |
|             | Least Squares     | kernel            | 0.000219         | 0.000149            |
|             |                   | $\ell_2$ -squared | 0.000129         | 0.000058            |
| Diabetes    | Kernel            | kernel            |                  | 0.012               |
|             |                   | kernel            | 0.983            | 0.153               |
|             | Matrix-Vec        | $\ell_2$ -squared | 0.148            | 0.124               |
|             |                   | modified $\ell_2$ | 0.169            | 0.134               |
|             | Least Squares     | kernel            | 0.00127          | 0.00742             |
|             |                   | $\ell_2$ -squared | 0.000874         | 0.00667             |
| Independent | Kernel            | kernel            |                  | 0.000435            |
|             |                   | kernel            | 0.005925         | 0.004309            |
|             | Matrix-Vec        | $\ell_2$ -squared | 0.004942         | 0.003723            |
|             |                   | modified $\ell_2$ | 0.004517         | 0.003284            |
|             | Least Squares     | kernel            | 0.000581         | 0.000431            |
|             |                   | $\ell_2$ -squared | 0.000353         | 0.000322            |
| IRIS        | Kernel            | kernel            |                  | 0.0108              |
|             |                   | kernel            | 0.241            | 0.123               |
|             | Matrix-Vec        | $\ell_2$ -squared | 0.187            | 0.127               |
|             |                   | modified $\ell_2$ | 0.192            | 0.101               |
|             | Least Squares     | kernel            | 8.21e-06         | 1.64e-05            |
|             |                   | $\ell_2$ -squared | 1.15e-05         | 1.25e-05            |
| NHANES      | Kernel            | kernel            |                  | 0.000505            |
|             |                   | kernel            | 0.010318         | 0.007504            |
|             | Matrix-Vec        | $\ell_2$ -squared | 0.011346         | 0.008037            |
|             |                   | modified $\ell_2$ | 0.008947         | 0.006688            |
|             | Least Squares     | kernel            | 0.002385         | 0.001926            |
|             |                   | $\ell_2$ -squared | 0.001368         | 0.00221             |
|             | modified $\ell_2$ | 0.001540          | 0.000375         |                     |

**Table 3:** (Lower Quantile) Mean Squared Error for Different Sampling and Approximation Methods Across Various Datasets

| Dataset           | Approximation | Sampling          | With Replacement | Without Replacement |
|-------------------|---------------|-------------------|------------------|---------------------|
| Adult             | Kernel        | kernel            |                  | 0.0291              |
|                   |               | kernel            | 0.968            | 0.144               |
|                   | Matrix-Vec    | $\ell_2$ -squared | 0.276            | 0.115               |
|                   |               | modified $\ell_2$ | 0.298            | 0.128               |
|                   | Least Squares | kernel            | 0.0111           | 0.00225             |
|                   |               | $\ell_2$ -squared | 0.00936          | 0.00238             |
| modified $\ell_2$ |               | 0.0091            | 0.00211          |                     |
| California        | Kernel        | kernel            |                  | 0.0269              |
|                   | Matrix-Vec    | kernel            | 1.64             | 0.274               |
|                   |               | $\ell_2$ -squared | 0.293            | 0.242               |
|                   |               | modified $\ell_2$ | 0.376            | 0.236               |
|                   | Least Squares | kernel            | 0.00597          | 0.00313             |
|                   |               | $\ell_2$ -squared | 0.00542          | 0.00317             |
| modified $\ell_2$ |               | 0.00586           | 0.00331          |                     |
| Communities       | Kernel        | kernel            |                  | 0.000877            |
|                   | Matrix-Vec    | kernel            | 0.010869         | 0.008674            |
|                   |               | $\ell_2$ -squared | 0.009949         | 0.029046            |
|                   |               | modified $\ell_2$ | 0.008383         | 0.019998            |
|                   | Least Squares | kernel            | 0.000968         | 0.000787            |
|                   |               | $\ell_2$ -squared | 0.000522         | 0.000335            |
| modified $\ell_2$ |               | 0.000597          | 0.000346         |                     |
| Correlated        | Kernel        | kernel            |                  | 0.000721            |
|                   | Matrix-Vec    | kernel            | 0.009207         | 0.005980            |
|                   |               | $\ell_2$ -squared | 0.010407         | 0.002896            |
|                   |               | modified $\ell_2$ | 0.007889         | 0.003279            |
|                   | Least Squares | kernel            | 0.000294         | 0.000195            |
|                   |               | $\ell_2$ -squared | 0.000159         | 0.000073            |
| modified $\ell_2$ |               | 0.000184          | 0.000081         |                     |
| Diabetes          | Kernel        | kernel            |                  | 0.023               |
|                   | Matrix-Vec    | kernel            | 2.08             | 0.358               |
|                   |               | $\ell_2$ -squared | 0.318            | 0.296               |
|                   |               | modified $\ell_2$ | 0.382            | 0.315               |
|                   | Least Squares | kernel            | 0.00249          | 0.0146              |
|                   |               | $\ell_2$ -squared | 0.00237          | 0.0144              |
| modified $\ell_2$ |               | 0.0024            | 0.0141           |                     |
| Independent       | Kernel        | kernel            |                  | 0.000551            |
|                   | Matrix-Vec    | kernel            | 0.007710         | 0.005508            |
|                   |               | $\ell_2$ -squared | 0.006441         | 0.004724            |
|                   |               | modified $\ell_2$ | 0.005656         | 0.004196            |
|                   | Least Squares | kernel            | 0.000745         | 0.000558            |
|                   |               | $\ell_2$ -squared | 0.000463         | 0.000413            |
| modified $\ell_2$ |               | 0.000529          | 0.000444         |                     |
| IRIS              | Kernel        | kernel            |                  | 0.0453              |
|                   | Matrix-Vec    | kernel            | 0.851            | 0.593               |
|                   |               | $\ell_2$ -squared | 0.531            | 0.411               |
|                   |               | modified $\ell_2$ | 0.538            | 0.504               |
|                   | Least Squares | kernel            | 3.28e-05         | 2.76e-05            |
|                   |               | $\ell_2$ -squared | 3.28e-05         | 0.000131            |
| modified $\ell_2$ |               | 3.28e-05          | 3.3e-05          |                     |
| NHANES            | Kernel        | kernel            |                  | 0.000704            |
|                   | Matrix-Vec    | kernel            | 0.012395         | 0.009490            |
|                   |               | $\ell_2$ -squared | 0.014504         | 0.009863            |
|                   |               | modified $\ell_2$ | 0.010979         | 0.008374            |
|                   | Least Squares | kernel            | 0.002917         | 0.002366            |
|                   |               | $\ell_2$ -squared | 0.001668         | 0.00221             |
| modified $\ell_2$ |               | 0.001888          | 0.000471         |                     |

**Table 4:** (Upper Quantile) Mean Squared Error for Different Sampling and Approximation Methods Across Various Datasets

| Dataset     | Samples | Distribution      | $Q_1$    | Median MSE | $Q_3$    |
|-------------|---------|-------------------|----------|------------|----------|
| Adult       | 64      | kernel            | 0.0574   | 0.0839     | 0.144    |
|             |         | $\ell_2$ -squared | 0.0633   | 0.0977     | 0.143    |
|             |         | modified $\ell_2$ | 0.0568   | 0.0907     | 0.127    |
| California  | 64      | kernel            | 0.102    | 0.165      | 0.288    |
|             |         | $\ell_2$ -squared | 0.095    | 0.129      | 0.241    |
|             |         | modified $\ell_2$ | 0.098    | 0.15       | 0.233    |
| Communities | 50000   | kernel            | 0.000765 | 0.000851   | 0.000920 |
|             |         | $\ell_2$ -squared | 0.000555 | 0.000600   | 0.000672 |
|             |         | modified $\ell_2$ | 0.000595 | 0.000637   | 0.000695 |
| Correlated  | 50000   | kernel            | 0.000495 | 0.000566   | 0.000644 |
|             |         | $\ell_2$ -squared | 0.000402 | 0.000448   | 0.000528 |
|             |         | modified $\ell_2$ | 0.000431 | 0.000493   | 0.000562 |
| Diabetes    | 64      | kernel            | 0.216    | 0.36       | 0.509    |
|             |         | $\ell_2$ -squared | 0.328    | 0.432      | 0.562    |
|             |         | modified $\ell_2$ | 0.29     | 0.393      | 0.577    |
| Independent | 50000   | kernel            | 0.000435 | 0.000510   | 0.000541 |
|             |         | $\ell_2$ -squared | 0.000368 | 0.000426   | 0.000487 |
|             |         | modified $\ell_2$ | 0.000407 | 0.000446   | 0.000494 |
| IRIS        | 10      | kernel            | 0.122    | 0.443      | 0.593    |
|             |         | $\ell_2$ -squared | 0.0883   | 0.361      | 0.473    |
|             |         | modified $\ell_2$ | 0.101    | 0.414      | 0.54     |
| NHANES      | 50000   | kernel            | 0.002350 | 0.002696   | 0.002915 |
|             |         | $\ell_2$ -squared | 0.001704 | 0.001868   | 0.002084 |
|             |         | modified $\ell_2$ | 0.001845 | 0.002055   | 0.002203 |

**Table 5:** Values for  $b_0$  in Fig. 2 (3) Comparison: Quantile Values for Different Datasets and Sampling Methods (least squares estimator without replacement, paired).

| Dataset | Samples | Approximation | Time                   | $Q_1$                  | Median MSE             | $Q_3$                  |
|---------|---------|---------------|------------------------|------------------------|------------------------|------------------------|
| MNIST   | 500     | Matrix-Vector | $7.140 \times 10^{-1}$ | $2.625 \times 10^4$    | $2.668 \times 10^4$    | $2.681 \times 10^4$    |
|         |         | Least Squares | $1.850 \times 10^0$    | $6.087 \times 10^{-2}$ | $6.144 \times 10^{-2}$ | $6.188 \times 10^{-2}$ |
|         |         | KernelSHAP    | $7.390 \times 10^{-1}$ | $9.235 \times 10^1$    | $1.309 \times 10^2$    | $2.147 \times 10^2$    |
|         | 1000    | Matrix-Vector | $9.270 \times 10^{-1}$ | $8.394 \times 10^3$    | $8.491 \times 10^3$    | $8.566 \times 10^3$    |
|         |         | Least Squares | $1.960 \times 10^0$    | $5.879 \times 10^{-2}$ | $5.914 \times 10^{-2}$ | $5.949 \times 10^{-2}$ |
|         |         | KernelSHAP    | $8.920 \times 10^{-1}$ | $1.745 \times 10^0$    | $1.784 \times 10^0$    | $1.816 \times 10^0$    |
|         | 10000   | Matrix-Vector | $5.540 \times 10^0$    | $2.385 \times 10^2$    | $2.393 \times 10^2$    | $2.414 \times 10^2$    |
|         |         | Least Squares | $7.710 \times 10^0$    | $4.889 \times 10^{-2}$ | $4.939 \times 10^{-2}$ | $4.964 \times 10^{-2}$ |
|         |         | KernelSHAP    | $2.940 \times 10^0$    | $7.866 \times 10^{-2}$ | $7.979 \times 10^{-2}$ | $8.058 \times 10^{-2}$ |
|         | 100000  | Matrix-Vector | $5.240 \times 10^1$    | $1.048 \times 10^1$    | $1.058 \times 10^1$    | $1.063 \times 10^1$    |
|         |         | Least Squares | $6.790 \times 10^1$    | $3.071 \times 10^{-2}$ | $3.117 \times 10^{-2}$ | $3.150 \times 10^{-2}$ |
|         |         | KernelSHAP    | $2.840 \times 10^1$    | $7.374 \times 10^{-3}$ | $7.472 \times 10^{-3}$ | $7.593 \times 10^{-3}$ |
| CIFAR10 | 500     | Matrix-Vector | $1.990 \times 10^1$    | $1.411 \times 10^3$    | $1.476 \times 10^3$    | $3.191 \times 10^3$    |
|         |         | Least Squares | $9.810 \times 10^2$    | $1.440 \times 10^0$    | $1.478 \times 10^0$    | $1.494 \times 10^0$    |
|         |         | KernelSHAP    | $1.390 \times 10^2$    | $3.112 \times 10^4$    | $1.114 \times 10^5$    | $6.247 \times 10^5$    |
|         | 1000    | Matrix-Vector | $2.180 \times 10^1$    | $5.755 \times 10^2$    | $9.362 \times 10^2$    | $1.314 \times 10^3$    |
|         |         | Least Squares | $1.270 \times 10^3$    | $2.025 \times 10^0$    | $2.047 \times 10^0$    | $2.094 \times 10^0$    |
|         |         | KernelSHAP    | $1.350 \times 10^2$    | $2.411 \times 10^4$    | $1.153 \times 10^5$    | $1.033 \times 10^6$    |
|         | 10000   | Matrix-Vector | $5.690 \times 10^1$    | $9.168 \times 10^1$    | $1.031 \times 10^2$    | $1.172 \times 10^2$    |
|         |         | Least Squares | $1.210 \times 10^3$    | $1.000 \times 10^1$    | $1.035 \times 10^1$    | $1.059 \times 10^1$    |
|         |         | KernelSHAP    | $2.820 \times 10^2$    | $2.846 \times 10^1$    | $2.870 \times 10^1$    | $2.897 \times 10^1$    |
|         | 100000  | Matrix-Vector | $3.190 \times 10^2$    | $1.014 \times 10^1$    | $1.068 \times 10^1$    | $1.104 \times 10^1$    |
|         |         | Least Squares | $3.030 \times 10^3$    | $4.168 \times 10^{-1}$ | $4.252 \times 10^{-1}$ | $4.295 \times 10^{-1}$ |
|         |         | KernelSHAP    | $1.860 \times 10^3$    | $1.050 \times 10^0$    | $1.053 \times 10^0$    | $1.053 \times 10^0$    |

**Table 6:** Performance Metrics for MNIST and CIFAR-10 Datasets Using Different Methods ( $\ell_2$ -squared estimator, without replacement, paired sampling with  $b_0$ ).

| Dataset | Samples | Approximation | Deletion AUC | Insertion AUC | Rank. Corr. |
|---------|---------|---------------|--------------|---------------|-------------|
| MNIST   | 500     | Matrix-Vector | 0.758        | 0.721         | 0.632       |
|         |         | Least Squares | 0.758        | 0.718         | 0.737       |
|         |         | KernelSHAP    | 0.601        | 0.589         | 0.959       |
|         | 1000    | Matrix-Vector | 0.758        | 0.719         | 0.639       |
|         |         | Least Squares | 0.761        | 0.718         | 0.742       |
|         |         | KernelSHAP    | 0.707        | 0.649         | 0.975       |
|         | 10000   | Matrix-Vector | 0.762        | 0.723         | 0.655       |
|         |         | Least Squares | 0.762        | 0.717         | 0.753       |
|         |         | KernelSHAP    | 0.762        | 0.710         | 0.992       |
|         | 100000  | Matrix-Vector | 0.756        | 0.715         | 0.674       |
|         |         | Least Squares | 0.758        | 0.719         | 0.767       |
|         |         | KernelSHAP    | 0.762        | 0.714         | 0.996       |
| CIFAR10 | 500     | Matrix-Vector | 0.581        | 0.548         | 0.008       |
|         |         | Least Squares | 0.604        | 0.535         | 0.033       |
|         |         | KernelSHAP    | 0.607        | 0.610         | 0.026       |
|         | 1000    | Matrix-Vector | 0.560        | 0.523         | 0.020       |
|         |         | Least Squares | 0.584        | 0.541         | 0.061       |
|         |         | KernelSHAP    | 0.613        | 0.612         | 0.028       |
|         | 10000   | Matrix-Vector | 0.544        | 0.510         | 0.069       |
|         |         | Least Squares | 0.661        | 0.571         | 0.185       |
|         |         | KernelSHAP    | 0.629        | 0.555         | 0.184       |
|         | 100000  | Matrix-Vector | 0.521        | 0.485         | 0.239       |
|         |         | Least Squares | 0.679        | 0.558         | 0.662       |
|         |         | KernelSHAP    | 0.685        | 0.557         | 0.540       |

**Table 7:** AUC and Rank Correlation for MNIST and CIFAR10 Datasets Using Different Methods ( $\ell_2$ -squared estimator, without replacement, paired sampling with  $\mathbf{b}_0$ ).
